# Supplementary material for: Function of the CRISPR-Cas System of the Human Pathogen Clostridium difficile
Source: PubMed Central journal article supplement — mBio. 2015 Sep 1;6(5):e01112-15. doi: 10.1128/mBio.01112-15 (PMC4556805; doi:10.1128/mbio.01112-15), 2015-09-01
Supplement: mbo004152441sf3.pdf [file mbo004152441sf3.pdf]

**Clostridium difficile 200785S**

NC 017179 40  
 PR 10.1 PR 10.2 PR 10.3 PR 10.4 PR 10.5 PR 10.6 PR 10.7 PR 10.8 PR 10.9 PR 10.10 PR 10.11 PR 10.12 PR 10.13 PR 10.14  
 NC 017179 41  
 PR 11.1 PR 11.2 PR 11.3 PR 11.4 PR 11.5 PR 11.6 PR 11.7 PR 11.8 PR 11.9 PR 11.10 PR 11.11  
 NC 017179 42  
 PR 12.1 PR 12.2 PR 12.3 PR 12.4  
 NC 017179 43  
 PR 13.1 PR 13.2 PR 13.3 PR 13.4 PR 13.5  
 NC 017179 44  
 PR 14.1 PR 14.2 PR 14.3 PR 14.4  
 NC 017179 45  
 PR 15.1 PR 15.2 PR 15.3 PR 15.4 PR 15.5 PR 15.6 PR 15.7 PR 15.8 PR 15.9 PR 15.10 PR 15.11 PR 15.12 PR 15.13 PR 15.14 PR 15.15 PR 15.16 PR 15.17 PR 15.18  
 NC 017179 46  
 PR 16.1 PR 16.2 PR 16.3 PR 16.4 PR 16.5 PR 16.6 PR 16.7 PR 16.8 PR 16.9  
 NC 017179 47  
 PR 17.1 PR 17.2 PR 17.3 PR 17.4 PR 17.5 PR 17.6 PR 17.7 PR 17.8 PR 17.9 PR 17.10 PR 17.11 PR 17.12 PR 17.13 PR 17.14 PR 17.15 PR 17.16 PR 17.17 PR 17.18 PR 17.19 PR 17.20 PR 17.21 PR 17.22 PR 17.23 PR 17.24  
 NC 017179 48  
 PR 20.1 PR 20.2 PR 20.3 PR 20.4 PR 20.5 PR 20.6 PR 20.7 PR 20.8 PR 20.9

**Clostridium difficile B11**

NC 017179 49  
 PR 10.1 PR 10.2 PR 10.3 PR 10.4 PR 10.5 PR 10.6 PR 10.7 PR 10.8 PR 10.9 PR 10.10 PR 10.11 PR 10.12 PR 10.13 PR 10.14  
 NC 017179 41  
 PR 11.1 PR 11.2 PR 11.3 PR 11.4 PR 11.5 PR 11.6 PR 11.7 PR 11.8 PR 11.9 PR 11.10 PR 11.11  
 NC 017179 42  
 PR 12.1 PR 12.2 PR 12.3 PR 12.4  
 NC 017179 43  
 PR 13.1 PR 13.2 PR 13.3 PR 13.4 PR 13.5  
 NC 017179 44  
 PR 14.1 PR 14.2 PR 14.3 PR 14.4  
 NC 017179 45  
 PR 15.1 PR 15.2 PR 15.3 PR 15.4 PR 15.5 PR 15.6 PR 15.7 PR 15.8 PR 15.9 PR 15.10 PR 15.11 PR 15.12 PR 15.13 PR 15.14 PR 15.15 PR 15.16 PR 15.17 PR 15.18  
 NC 017179 46  
 PR 16.1 PR 16.2 PR 16.3 PR 16.4 PR 16.5 PR 16.6 PR 16.7 PR 16.8 PR 16.9  
 NC 017179 47  
 PR 17.1 PR 17.2 PR 17.3 PR 17.4 PR 17.5 PR 17.6 PR 17.7 PR 17.8 PR 17.9 PR 17.10 PR 17.11 PR 17.12 PR 17.13 PR 17.14 PR 17.15 PR 17.16 PR 17.17 PR 17.18 PR 17.19 PR 17.20 PR 17.21 PR 17.22 PR 17.23 PR 17.24  
 NC 017179 48  
 PR 20.1 PR 20.2 PR 20.3 PR 20.4 PR 20.5 PR 20.6 PR 20.7 PR 20.8 PR 20.9

**Clostridium difficile CD196**

NC 013315 40  
 PR 10.1 PR 10.2 PR 10.3 PR 10.4 PR 10.5 PR 10.6 PR 10.7 PR 10.8 PR 10.9 PR 10.10 PR 10.11 PR 10.12 PR 10.13 PR 10.14  
 NC 013315 41  
 PR 11.1 PR 11.2 PR 11.3 PR 11.4 PR 11.5 PR 11.6 PR 11.7 PR 11.8 PR 11.9 PR 11.10 PR 11.11  
 NC 013315 42  
 PR 12.1 PR 12.2 PR 12.3 PR 12.4  
 NC 013315 43  
 PR 13.1 PR 13.2 PR 13.3 PR 13.4 PR 13.5  
 NC 013315 44  
 PR 14.1 PR 14.2 PR 14.3 PR 14.4  
 NC 013315 45  
 PR 15.1 PR 15.2 PR 15.3 PR 15.4 PR 15.5 PR 15.6 PR 15.7 PR 15.8 PR 15.9 PR 15.10 PR 15.11 PR 15.12 PR 15.13 PR 15.14 PR 15.15 PR 15.16 PR 15.17 PR 15.18  
 NC 013315 46  
 PR 16.1 PR 16.2 PR 16.3 PR 16.4 PR 16.5 PR 16.6 PR 16.7 PR 16.8 PR 16.9  
 NC 013315 47  
 PR 17.1 PR 17.2 PR 17.3 PR 17.4 PR 17.5 PR 17.6 PR 17.7 PR 17.8 PR 17.9 PR 17.10 PR 17.11 PR 17.12 PR 17.13 PR 17.14 PR 17.15 PR 17.16 PR 17.17 PR 17.18 PR 17.19 PR 17.20 PR 17.21 PR 17.22 PR 17.23 PR 17.24  
 NC 013315 48  
 PR 20.1 PR 20.2 PR 20.3 PR 20.4 PR 20.5 PR 20.6 PR 20.7 PR 20.8 PR 20.9

**Clostridium difficile R2021**

NC 013316 40  
 PR 10.1 PR 10.2 PR 10.3 PR 10.4 PR 10.5 PR 10.6 PR 10.7 PR 10.8 PR 10.9 PR 10.10 PR 10.11 PR 10.12 PR 10.13 PR 10.14  
 NC 013316 41  
 PR 11.1 PR 11.2 PR 11.3 PR 11.4 PR 11.5 PR 11.6 PR 11.7 PR 11.8 PR 11.9 PR 11.10 PR 11.11  
 NC 013316 42  
 PR 12.1 PR 12.2 PR 12.3 PR 12.4  
 NC 013316 43  
 PR 13.1 PR 13.2 PR 13.3 PR 13.4 PR 13.5  
 NC 013316 44  
 PR 14.1 PR 14.2 PR 14.3 PR 14.4  
 NC 013316 45  
 PR 15.1 PR 15.2 PR 15.3 PR 15.4 PR 15.5 PR 15.6 PR 15.7 PR 15.8 PR 15.9 PR 15.10 PR 15.11 PR 15.12 PR 15.13 PR 15.14 PR 15.15 PR 15.16 PR 15.17 PR 15.18  
 NC 013316 46  
 PR 16.1 PR 16.2 PR 16.3 PR 16.4 PR 16.5 PR 16.6 PR 16.7 PR 16.8 PR 16.9  
 NC 013316 47  
 PR 17.1 PR 17.2 PR 17.3 PR 17.4 PR 17.5 PR 17.6 PR 17.7 PR 17.8 PR 17.9 PR 17.10 PR 17.11 PR 17.12 PR 17.13 PR 17.14 PR 17.15 PR 17.16 PR 17.17 PR 17.18 PR 17.19 PR 17.20 PR 17.21 PR 17.22 PR 17.23 PR 17.24  
 NC 013316 48  
 PR 20.1 PR 20.2 PR 20.3 PR 20.4 PR 20.5 PR 20.6 PR 20.7 PR 20.8 PR 20.9

**Clostridium difficile 630**

NC 009089 3  
 PR 3.1 PR 3.2 PR 3.3 PR 3.4 PR 3.5 PR 3.6  
 NC 009089 4  
 PR 4.1 PR 4.2 PR 4.3 PR 4.4 PR 4.5  
 NC 009089 5  

|   |   |   |   |   |   |   |   |   |    |    |    |    |
|---|---|---|---|---|---|---|---|---|----|----|----|----|
| 1 | 2 | 3 | 4 | 5 | 6 | 7 | 8 | 9 | 10 | 11 | 12 | 13 |
|---|---|---|---|---|---|---|---|---|----|----|----|----|

 NC 009089 7  

|   |   |   |   |   |   |   |   |   |    |    |    |    |    |
|---|---|---|---|---|---|---|---|---|----|----|----|----|----|
| 1 | 2 | 3 | 4 | 5 | 6 | 7 | 8 | 9 | 10 | 11 | 12 | 13 | 14 |
|---|---|---|---|---|---|---|---|---|----|----|----|----|----|

 NC 009089 8  

|   |   |   |   |   |   |   |   |
|---|---|---|---|---|---|---|---|
| 1 | 2 | 3 | 4 | 5 | 6 | 7 | 8 |
|---|---|---|---|---|---|---|---|

 NC 009089 9  

|   |   |   |   |   |   |   |   |   |    |    |    |    |    |    |
|---|---|---|---|---|---|---|---|---|----|----|----|----|----|----|
| 1 | 2 | 3 | 4 | 5 | 6 | 7 | 8 | 9 | 10 | 11 | 12 | 13 | 14 | 15 |
|---|---|---|---|---|---|---|---|---|----|----|----|----|----|----|

 NC 009089 10  

|   |   |
|---|---|
| 1 | 2 |
|---|---|

 NC 009089 11  

|   |   |   |   |   |   |   |   |   |    |    |    |    |    |    |    |    |    |    |    |    |    |    |    |
|---|---|---|---|---|---|---|---|---|----|----|----|----|----|----|----|----|----|----|----|----|----|----|----|
| 1 | 2 | 3 | 4 | 5 | 6 | 7 | 8 | 9 | 10 | 11 | 12 | 13 | 14 | 15 | 16 | 17 | 18 | 19 | 20 | 21 | 22 | 23 | 24 |
|---|---|---|---|---|---|---|---|---|----|----|----|----|----|----|----|----|----|----|----|----|----|----|----|

 NC 009089 12  

|   |   |   |   |   |   |   |   |   |    |    |    |    |    |    |    |    |    |    |    |    |    |    |    |    |    |    |    |    |    |    |    |    |    |    |    |    |    |    |    |    |    |    |    |    |    |    |    |    |    |
|---|---|---|---|---|---|---|---|---|----|----|----|----|----|----|----|----|----|----|----|----|----|----|----|----|----|----|----|----|----|----|----|----|----|----|----|----|----|----|----|----|----|----|----|----|----|----|----|----|----|
| 1 | 2 | 3 | 4 | 5 | 6 | 7 | 8 | 9 | 10 | 11 | 12 | 13 | 14 | 15 | 16 | 17 | 18 | 19 | 20 | 21 | 22 | 23 | 24 | 25 | 26 | 27 | 28 | 29 | 30 | 31 | 32 | 33 | 34 | 35 | 36 | 37 | 38 | 39 | 40 | 41 | 42 | 43 | 44 | 45 | 46 | 47 | 48 | 49 | 50 |
|---|---|---|---|---|---|---|---|---|----|----|----|----|----|----|----|----|----|----|----|----|----|----|----|----|----|----|----|----|----|----|----|----|----|----|----|----|----|----|----|----|----|----|----|----|----|----|----|----|----|

 NC 009089 15  
 PR 4.8 PR 4.9 PR 4.10  
 NC 009089 16  
 PR 3.1 PR 3.2 PR 3.3 PR 3.4 PR 3.5 PR 3.6  
 NC 009089 17  

|   |   |   |   |   |   |   |   |   |    |    |    |    |    |    |    |    |    |    |    |    |    |    |    |    |    |    |    |    |    |    |    |    |    |    |    |    |    |    |    |    |    |    |    |    |    |    |    |    |    |
|---|---|---|---|---|---|---|---|---|----|----|----|----|----|----|----|----|----|----|----|----|----|----|----|----|----|----|----|----|----|----|----|----|----|----|----|----|----|----|----|----|----|----|----|----|----|----|----|----|----|
| 1 | 2 | 3 | 4 | 5 | 6 | 7 | 8 | 9 | 10 | 11 | 12 | 13 | 14 | 15 | 16 | 17 | 18 | 19 | 20 | 21 | 22 | 23 | 24 | 25 | 26 | 27 | 28 | 29 | 30 | 31 | 32 | 33 | 34 | 35 | 36 | 37 | 38 | 39 | 40 | 41 | 42 | 43 | 44 | 45 | 46 | 47 | 48 | 49 | 50 |
|---|---|---|---|---|---|---|---|---|----|----|----|----|----|----|----|----|----|----|----|----|----|----|----|----|----|----|----|----|----|----|----|----|----|----|----|----|----|----|----|----|----|----|----|----|----|----|----|----|----|

**Clostridium difficile CF5**

NC 017175 5  
 PR 11.1 PR 11.2  
 NC 017175 6  
 PR 6.1 PR 6.2 PR 6.3 PR 6.4 PR 6.5 PR 6.6 PR 6.7 PR 6.8 PR 6.9 PR 6.10  
 NC 017175 7  

|   |   |   |   |   |   |   |
|---|---|---|---|---|---|---|
| 1 | 2 | 3 | 4 | 5 | 6 | 7 |
|---|---|---|---|---|---|---|

 NC 017175 8  

|   |   |   |   |   |   |   |   |   |    |    |    |    |    |    |    |    |    |    |    |    |    |    |    |    |    |    |    |    |    |    |    |    |    |    |    |    |    |    |    |    |    |    |    |    |    |    |    |    |    |
|---|---|---|---|---|---|---|---|---|----|----|----|----|----|----|----|----|----|----|----|----|----|----|----|----|----|----|----|----|----|----|----|----|----|----|----|----|----|----|----|----|----|----|----|----|----|----|----|----|----|
| 1 | 2 | 3 | 4 | 5 | 6 | 7 | 8 | 9 | 10 | 11 | 12 | 13 | 14 | 15 | 16 | 17 | 18 | 19 | 20 | 21 | 22 | 23 | 24 | 25 | 26 | 27 | 28 | 29 | 30 | 31 | 32 | 33 | 34 | 35 | 36 | 37 | 38 | 39 | 40 | 41 | 42 | 43 | 44 | 45 | 46 | 47 | 48 | 49 | 50 |
|---|---|---|---|---|---|---|---|---|----|----|----|----|----|----|----|----|----|----|----|----|----|----|----|----|----|----|----|----|----|----|----|----|----|----|----|----|----|----|----|----|----|----|----|----|----|----|----|----|----|

 NC 017175 9  

|   |   |   |
|---|---|---|
| 1 | 2 | 3 |
|---|---|---|

 NC 017175 10  

|   |   |   |   |   |   |   |   |   |    |    |    |    |    |    |    |    |    |    |    |    |    |    |    |    |    |    |    |    |    |    |    |    |    |    |    |    |    |    |    |    |    |    |    |    |    |    |    |    |    |
|---|---|---|---|---|---|---|---|---|----|----|----|----|----|----|----|----|----|----|----|----|----|----|----|----|----|----|----|----|----|----|----|----|----|----|----|----|----|----|----|----|----|----|----|----|----|----|----|----|----|
| 1 | 2 | 3 | 4 | 5 | 6 | 7 | 8 | 9 | 10 | 11 | 12 | 13 | 14 | 15 | 16 | 17 | 18 | 19 | 20 | 21 | 22 | 23 | 24 | 25 | 26 | 27 | 28 | 29 | 30 | 31 | 32 | 33 | 34 | 35 | 36 | 37 | 38 | 39 | 40 | 41 | 42 | 43 | 44 | 45 | 46 | 47 | 48 | 49 | 50 |
|---|---|---|---|---|---|---|---|---|----|----|----|----|----|----|----|----|----|----|----|----|----|----|----|----|----|----|----|----|----|----|----|----|----|----|----|----|----|----|----|----|----|----|----|----|----|----|----|----|----|

 NC 017175 11  
 PR 12.1 PR 12.2 PR 12.3 PR 12.4 PR 12.5

**Clostridium difficile M68**

NC 017175 5  
 PR 11.1 PR 11.2  
 NC 017175 6  
 PR 6.1 PR 6.2 PR 6.3 PR 6.4 PR 6.5 PR 6.6 PR 6.7 PR 6.8 PR 6.9 PR 6.10  
 NC 017175 7  

|   |   |   |   |
|---|---|---|---|
| 1 | 2 | 3 | 4 |
|---|---|---|---|

 NC 017175 8  

|   |   |   |
|---|---|---|
| 1 | 2 | 3 |
|---|---|---|

 NC 017175 9  

|   |   |   |   |   |   |
|---|---|---|---|---|---|
| 1 | 2 | 3 | 4 | 5 | 6 |
|---|---|---|---|---|---|

 NC 017175 10  

|   |   |   |   |   |   |   |   |   |
|---|---|---|---|---|---|---|---|---|
| 1 | 2 | 3 | 4 | 5 | 6 | 7 | 8 | 9 |
|---|---|---|---|---|---|---|---|---|

 NC 017175 11  
 PR 12.1 PR 12.2 PR 12.3 PR 12.4 PR 12.5

**Clostridium difficile B10**

NC 013974 6  

|   |   |   |
|---|---|---|
| 1 | 2 | 3 |
|---|---|---|

 NC 013974 7  

|   |   |   |   |   |
|---|---|---|---|---|
| 1 | 2 | 3 | 4 | 5 |
|---|---|---|---|---|

 NC 013974 8  

|   |   |   |   |   |
|---|---|---|---|---|
| 1 | 2 | 3 | 4 | 5 |
|---|---|---|---|---|

 NC 013974 10  

|   |   |   |   |   |   |   |   |   |    |    |    |    |
|---|---|---|---|---|---|---|---|---|----|----|----|----|
| 1 | 2 | 3 | 4 | 5 | 6 | 7 | 8 | 9 | 10 | 11 | 12 | 13 |
|---|---|---|---|---|---|---|---|---|----|----|----|----|

 NC 013974 11  

|   |   |   |   |   |   |   |
|---|---|---|---|---|---|---|
| 1 | 2 | 3 | 4 | 5 | 6 | 7 |
|---|---|---|---|---|---|---|

 NC 013974 12  

|   |   |   |   |   |   |   |   |   |    |    |    |    |    |    |    |    |    |    |    |    |    |    |    |    |    |    |    |    |    |    |    |    |    |    |    |    |    |    |    |    |    |    |    |    |    |    |    |    |    |
|---|---|---|---|---|---|---|---|---|----|----|----|----|----|----|----|----|----|----|----|----|----|----|----|----|----|----|----|----|----|----|----|----|----|----|----|----|----|----|----|----|----|----|----|----|----|----|----|----|----|
| 1 | 2 | 3 | 4 | 5 | 6 | 7 | 8 | 9 | 10 | 11 | 12 | 13 | 14 | 15 | 16 | 17 | 18 | 19 | 20 | 21 | 22 | 23 | 24 | 25 | 26 | 27 | 28 | 29 | 30 | 31 | 32 | 33 | 34 | 35 | 36 | 37 | 38 | 39 | 40 | 41 | 42 | 43 | 44 | 45 | 46 | 47 | 48 | 49 | 50 |
|---|---|---|---|---|---|---|---|---|----|----|----|----|----|----|----|----|----|----|----|----|----|----|----|----|----|----|----|----|----|----|----|----|----|----|----|----|----|----|----|----|----|----|----|----|----|----|----|----|----|

 NC 013974 13  

|   |   |   |   |   |   |   |
|---|---|---|---|---|---|---|
| 1 | 2 | 3 | 4 | 5 | 6 | 7 |
|---|---|---|---|---|---|---|

 NC 013974 14  

|   |   |   |   |   |   |   |   |   |    |    |    |    |    |    |    |    |    |    |    |    |    |    |    |    |    |    |    |    |    |    |    |    |    |    |    |    |    |    |    |    |    |    |    |    |    |    |    |    |    |
|---|---|---|---|---|---|---|---|---|----|----|----|----|----|----|----|----|----|----|----|----|----|----|----|----|----|----|----|----|----|----|----|----|----|----|----|----|----|----|----|----|----|----|----|----|----|----|----|----|----|
| 1 | 2 | 3 | 4 | 5 | 6 | 7 | 8 | 9 | 10 | 11 | 12 | 13 | 14 | 15 | 16 | 17 | 18 | 19 | 20 | 21 | 22 | 23 | 24 | 25 | 26 | 27 | 28 | 29 | 30 | 31 | 32 | 33 | 34 | 35 | 36 | 37 | 38 | 39 | 40 | 41 | 42 | 43 | 44 | 45 | 46 | 47 | 48 | 49 | 50 |
|---|---|---|---|---|---|---|---|---|----|----|----|----|----|----|----|----|----|----|----|----|----|----|----|----|----|----|----|----|----|----|----|----|----|----|----|----|----|----|----|----|----|----|----|----|----|----|----|----|----|

 NC 013974 17  
 PR 17.1 PR 17.2  
 NC 013974 18  

|   |   |   |   |   |   |   |   |   |    |
|---|---|---|---|---|---|---|---|---|----|
| 1 | 2 | 3 | 4 | 5 | 6 | 7 | 8 | 9 | 10 |
|---|---|---|---|---|---|---|---|---|----|

**Clostridium difficile M120**

NC 017124 3  

|   |   |   |   |   |   |   |   |   |
|---|---|---|---|---|---|---|---|---|
| 1 | 2 | 3 | 4 | 5 | 6 | 7 | 8 | 9 |
|---|---|---|---|---|---|---|---|---|

 NC 017124 5  

|   |   |   |   |   |   |   |   |   |    |    |    |    |    |    |    |    |
|---|---|---|---|---|---|---|---|---|----|----|----|----|----|----|----|----|
| 1 | 2 | 3 | 4 | 5 | 6 | 7 | 8 | 9 | 10 | 11 | 12 | 13 | 14 | 15 | 16 | 17 |
|---|---|---|---|---|---|---|---|---|----|----|----|----|----|----|----|----|

 NC 017124 6  

|   |   |   |   |   |   |   |   |   |    |    |    |    |    |    |    |    |    |    |    |    |    |    |    |    |    |    |    |    |    |    |    |    |    |    |    |    |    |    |    |    |    |    |    |    |    |    |    |    |    |
|---|---|---|---|---|---|---|---|---|----|----|----|----|----|----|----|----|----|----|----|----|----|----|----|----|----|----|----|----|----|----|----|----|----|----|----|----|----|----|----|----|----|----|----|----|----|----|----|----|----|
| 1 | 2 | 3 | 4 | 5 | 6 | 7 | 8 | 9 | 10 | 11 | 12 | 13 | 14 | 15 | 16 | 17 | 18 | 19 | 20 | 21 | 22 | 23 | 24 | 25 | 26 | 27 | 28 | 29 | 30 | 31 | 32 | 33 | 34 | 35 | 36 | 37 | 38 | 39 | 40 | 41 | 42 | 43 | 44 | 45 | 46 | 47 | 48 | 49 | 50 |
|---|---|---|---|---|---|---|---|---|----|----|----|----|----|----|----|----|----|----|----|----|----|----|----|----|----|----|----|----|----|----|----|----|----|----|----|----|----|----|----|----|----|----|----|----|----|----|----|----|----|

 NC 017124 7  

|   |   |   |   |   |   |   |   |   |    |    |    |
|---|---|---|---|---|---|---|---|---|----|----|----|
| 1 | 2 | 3 | 4 | 5 | 6 | 7 | 8 | 9 | 10 | 11 | 12 |
|---|---|---|---|---|---|---|---|---|----|----|----|

 NC 017124 8  

|   |   |   |   |   |   |   |   |   |    |    |    |    |    |    |    |    |    |    |    |    |    |    |    |    |    |    |    |    |    |    |    |    |    |    |    |    |    |    |    |    |    |    |    |    |    |    |    |    |    |
|---|---|---|---|---|---|---|---|---|----|----|----|----|----|----|----|----|----|----|----|----|----|----|----|----|----|----|----|----|----|----|----|----|----|----|----|----|----|----|----|----|----|----|----|----|----|----|----|----|----|
| 1 | 2 | 3 | 4 | 5 | 6 | 7 | 8 | 9 | 10 | 11 | 12 | 13 | 14 | 15 | 16 | 17 | 18 | 19 | 20 | 21 | 22 | 23 | 24 | 25 | 26 | 27 | 28 | 29 | 30 | 31 | 32 | 33 | 34 | 35 | 36 | 37 | 38 | 39 | 40 | 41 | 42 | 43 | 44 | 45 | 46 | 47 | 48 | 49 | 50 |
|---|---|---|---|---|---|---|---|---|----|----|----|----|----|----|----|----|----|----|----|----|----|----|----|----|----|----|----|----|----|----|----|----|----|----|----|----|----|----|----|----|----|----|----|----|----|----|----|----|----|

 NC 017124 10  

|   |   |   |   |   |   |   |   |   |    |    |    |    |    |    |    |    |    |    |    |    |    |    |    |    |    |    |    |    |    |    |    |    |    |    |    |    |    |    |    |    |    |    |    |    |    |    |    |    |    |
|---|---|---|---|---|---|---|---|---|----|----|----|----|----|----|----|----|----|----|----|----|----|----|----|----|----|----|----|----|----|----|----|----|----|----|----|----|----|----|----|----|----|----|----|----|----|----|----|----|----|
| 1 | 2 | 3 | 4 | 5 | 6 | 7 | 8 | 9 | 10 | 11 | 12 | 13 | 14 | 15 | 16 | 17 | 18 | 19 | 20 | 21 | 22 | 23 | 24 | 25 | 26 | 27 | 28 | 29 | 30 | 31 | 32 | 33 | 34 | 35 | 36 | 37 | 38 | 39 | 40 | 41 | 42 | 43 | 44 | 45 | 46 | 47 | 48 | 49 | 50 |
|---|---|---|---|---|---|---|---|---|----|----|----|----|----|----|----|----|----|----|----|----|----|----|----|----|----|----|----|----|----|----|----|----|----|----|----|----|----|----|----|----|----|----|----|----|----|----|----|----|----|

■ spacer deletion

Fig. S3. Spacer content of CRISPR arrays for nine *C. difficile* strains.
