# Supplementary material for: Function of the CRISPR-Cas System of the Human Pathogen Clostridium difficile
Source: PubMed Central journal article supplement — mBio. 2015 Sep 1;6(5):e01112-15. doi: 10.1128/mBio.01112-15 (PMC4556805; doi:10.1128/mbio.01112-15), 2015-09-01
Supplement: mbo004152441st1.pdf [file mbo004152441st1.pdf]

**Table S1. Expressed CRISPR arrays in *C. difficile* 630 and R20291 strains**

| Name*                                  | Spacer number | <i>cas</i> genes          | Strand | Array position                      | 5' end (TSS mapping or RNA-seq)** | Associated prophage               |
|----------------------------------------|---------------|---------------------------|--------|-------------------------------------|-----------------------------------|-----------------------------------|
| <i>C. difficile</i> 630 (NC_009089)    |               |                           |        |                                     |                                   |                                   |
| CRISPR 3/4                             | 6+3           |                           | +      | 1125024-1125450/<br>1125594-1125820 | 1124818                           | phiCD630-1<br>(1088001-1143874)   |
| CRISPR 6                               | 13            |                           | +      | 1434756-1435639                     | 1434587                           | skin element<br>(1429719-1443535) |
| CRISPR 7                               | 12            |                           | +      | 1645194-1646018                     | 1645024                           |                                   |
| CRISPR 8                               | 8             |                           | +      | 1756278-1756833                     | 1756109                           |                                   |
| CRISPR 9                               | 15            |                           | +      | 1935482-1936495                     | 1935311                           |                                   |
| CRISPR 10                              | 2             |                           | -      | 2298609-2298769                     | 2298940                           |                                   |
| CRISPR 11                              | 14            |                           | -      | 2662916-2663867                     | 2664038                           |                                   |
| CRISPR 12                              | 6             | <i>CD2451-<br/>CD2455</i> | -      | 2907464-2907889                     | 2908058                           |                                   |
| CRISPR 15/16                           | 3+6           |                           | -      | 3396821-3397048/<br>3397192-3397617 | 3397912                           | phiCD630-2<br>(3377033-3434358)   |
| CRISPR 17                              | 19            | <i>CD2975-<br/>CD2982</i> | -      | 3455483-3456758                     | 3456904                           |                                   |
| <i>C. difficile</i> R20291 (NC_013316) |               |                           |        |                                     |                                   |                                   |
| CRISPR 10                              | 14            |                           | +      | 1292344-1293301                     | ~1292120                          | skin element<br>(1285481-1301458) |
| CRISPR 11                              | 11            |                           | +      | 1501690-1502442                     | ~1501515                          |                                   |
| CRISPR 12                              | 4             |                           | +      | 1613062-1613355                     | ~1612847                          |                                   |
| CRISPR 13                              | 5             |                           | +      | 1705739-1706095                     | ~1705562                          | phi027<br>(1670843-1726818)       |
| CRISPR 14                              | 4             |                           | +      | 1707960-1708250                     | ~1707743                          | phi027<br>(1670843-1726818)       |
| CRISPR 15                              | 14            |                           | +      | 1845528-1846482                     | ~1845378                          |                                   |
| CRISPR 16                              | 9             |                           | -      | 2280799-2281424                     | ~2281585                          |                                   |
|                                        |               | <i>CDR20291_2348-2344</i> | -      | 2741672-2748179                     |                                   |                                   |
| CRISPR 19                              | 26            | <i>CDR20291_2817-2810</i> | -      | 3325026-3326772                     | ~3326972                          |                                   |
| CRISPR 20                              | 9             | <i>CDR20291_2998-2994</i> | -      | 3572161-3572783                     | ~3573037                          |                                   |

\*The numbering for CRISPR RNA is from CRISPRdb database (<http://crispr.u-psud.fr/crispr/>). \*\*The position of 5' end was identified by 5-end RNA-seq analysis for 630 strain (Soutourina *et al*, 2013) or estimated from RNA-seq data for R20291 strain.
