# Supplementary material for: Function of the CRISPR-Cas System of the Human Pathogen Clostridium difficile
Source: PubMed Central journal article supplement — mBio. 2015 Sep 1;6(5):e01112-15. doi: 10.1128/mBio.01112-15 (PMC4556805; doi:10.1128/mbio.01112-15), 2015-09-01
Supplement: mbo004152441st2.pdf [file mbo004152441st2.pdf]

Table S2. General analysis of CRISPR spacer matches for nine *C. difficile* strains.

(A) CRISPR spacer hits to chromosome, phage and plasmid sequences

|                                      | PCR Ribotype | MLST | N of spacers | hits to phages | hits to plasmids | hits to chromosomes | from them to prophages | % of prophage hits in chromosome hits |
|--------------------------------------|--------------|------|--------------|----------------|------------------|---------------------|------------------------|---------------------------------------|
| <i>Clostridium difficile</i> 2007855 | 027          | 3    | 98           | 32             | 1                | 11                  | 2                      | 18.18                                 |
| <i>Clostridium difficile</i> B11     | 027          | 3    | 98           | 32             | 1                | 14                  | 6                      | 42.86                                 |
| <i>Clostridium difficile</i> CD196   | 027          | 3    | 97           | 32             | 1                | 15                  | 6                      | 40.00                                 |
| <i>Clostridium difficile</i> R20291  | 027          | 3    | 96           | 31             | 3                | 9                   | 4                      | 44.44                                 |
| <i>Clostridium difficile</i> 630     | 012          | 27   | 107          | 32             | 2                | 10                  | 4                      | 40.00                                 |
| <i>Clostridium difficile</i> CF5     | 017          | 57   | 66           | 23             | 1                | 29                  | 17                     | 58.62                                 |
| <i>Clostridium difficile</i> M68     | 017          | 45   | 27           | 14             | 0                | 2                   | 2                      | 100.00                                |
| <i>Clostridium difficile</i> B19     | 001          | 36   | 77           | 19             | 3                | 14                  | 6                      | 42.86                                 |
| <i>Clostridium difficile</i> M120    | 078          | 49   | 153          | 85             | 14               | 14                  | 7                      | 50.00                                 |
| total in all strains                 |              |      | 819          | 300            | 26               | 118                 | 54                     | 45.76                                 |
| total in strains (%)                 |              |      |              | 36.63          | 3.17             | 14.41               | 6.59                   |                                       |

**Table S2. (B) CRISPR spacer matching of phage sequences.**

| hit_name              | hit_start           | hit_end | description                  | gene                                               |                                                  |
|-----------------------|---------------------|---------|------------------------------|----------------------------------------------------|--------------------------------------------------|
| NC_009089_10_spacer2  | emb LN881538.1 CTA  | 37 35   | 2, 5, 30                     | 4521 Clostridium phage phiCD146, complete genome   | Minor capsid protein                             |
| NC_009089_11_spacer1  | emb LN881539.1 CTA  | 37 37   | 0                            | 5459 Clostridium phage phiCD505, complete genome   | Conserved protein of unknown function            |
| NC_009089_11_spacer10 | emb LN881538.1 CCA  | 37 34   | 3, 9, 18                     | 11762 Clostridium phage phiCD146, complete genome  | Tail tube measure                                |
| NC_009089_11_spacer11 | emb LN881538.1 CCA  | 37 36   | 0                            | 15780 Clostridium phage phiCD211, complete genome  | Tail tube measure                                |
| NC_009089_12_spacer6  | emb LN881539.1 CTA  | 39 34   | 5, 2, 18, 27, 30             | 11782 Clostridium phage phiCD146, complete genome  | Terminase large subunit                          |
| NC_009089_15_spacer1  | emb NC_015262.1 CTA | 37 32   | 5, 8, 9, 12, 30              | 9757 Clostridium phage phiCD119, complete genome   | Xkfd protein                                     |
| NC_009089_15_spacer2  | emb LN881538.1 CTA  | 37 32   | 5, 18, 21, 30, 33            | 10861 Clostridium phage phiCD505, complete genome  | Conserved protein of unknown function            |
| NC_009089_15_spacer3  | emb LN881541.1 CCA  | 37 36   | 1                            | 14357 Clostridium phage phiCD505, complete genome  | Tail tube measure                                |
| NC_009089_16_spacer6  | emb LN881537.1 CTA  | 38 38   | 0                            | 118543 Clostridium phage phiCD211, complete genome | Conserved protein of unknown function            |
| NC_009089_16_spacer7  | emb LN881535.1 CTA  | 37 32   | 4, 12, 15, 17                | 8019 Clostridium phage phiCD119, complete genome   | Xkfd protein                                     |
| NC_009089_17_spacer1  | emb LN881539.1 CTA  | 37 37   | 0                            | 5442 Clostridium phage phiCD505, complete genome   | Conserved protein of unknown function            |
| NC_009089_17_spacer11 | emb LN881537.1 CTA  | 36 36   | 0                            | 119018 Clostridium phage phiCD211, complete genome | Conserved protein of unknown function            |
| NC_009089_17_spacer12 | emb LN881539.1 CTA  | 37 37   | 0                            | 121006 Clostridium phage phiCD211, complete genome | Intergenic region                                |
| NC_009089_17_spacer15 | emb LN881539.1 CTA  | 37 35   | 18                           | 39317 Clostridium phage phiMM001, complete genome  | Conserved protein of unknown function            |
| NC_009089_17_spacer2  | ref NC_015262.1 CTA | 37 37   | 0                            | 13484 Clostridium phage phiCD3636, complete genome | Phage protein XkAs                               |
| NC_009089_17_spacer4  | emb LN881539.1 CTA  | 37 31   | 6, 3, 6, 8, 19, 23, 24       | 25548 Clostridium phage phiCD505, complete genome  | Conserved protein of unknown function            |
| NC_009089_3_spacer2   | emb LN881537.1 CTA  | 38 38   | 0                            | 118543 Clostridium phage phiCD211, complete genome | Conserved protein of unknown function            |
| NC_009089_3_spacer3   | emb LN881535.1 CTA  | 37 33   | 4, 3, 12, 15, 17             | 8019 Clostridium phage phiCD119, complete genome   | Tail tube measure                                |
| NC_009089_4_spacer10  | ref NC_009171.CCA   | 37 32   | 5, 1, 8, 9, 12, 30           | 14357 Clostridium phage phiMM001, complete genome  | Tail tube measure                                |
| NC_009089_4_spacer9   | emb LN881539.1 CTA  | 37 32   | 5, 5, 19, 22, 31, 34         | 10861 Clostridium phage phiCD505, complete genome  | Conserved protein of unknown function            |
| NC_009089_6_spacer3   | ref NC_009171.CCA   | 36 32   | 4, 1, 2, 3, 26               | 9637 Clostridium phage phiCD119, complete genome   | putative integrase                               |
| NC_009089_6_spacer8   | emb LN881538.1 CCA  | 38 37   | 0                            | 119018 Clostridium phage phiCD211, complete genome | Intergenic region                                |
| NC_009089_7_spacer2   | emb LN881538.1 TCC  | 38 35   | 3, 12, 33, 35                | 9211 Clostridium phage phiCD481-1, complete genome | Site-specific recombinase phage integrase family |
| NC_009089_8_spacer2   | emb LN881542.1 CCA  | 36 36   | 0                            | 4801 Clostridium phage phiMM003, complete genome   | hypothetical protein                             |
| NC_009089_8_spacer4   | emb LN881538.1 CCA  | 37 35   | 2, 36, 37                    | 8836 Clostridium phage phiCD146, complete genome   | Conserved protein of unknown function            |
| NC_009089_8_spacer8   | emb LN881539.1 CCA  | 38 37   | 2, 38, 39                    | 12856 Clostridium phage phiCD505, complete genome  | putative phage tail tube measure protein         |
| NC_009089_9_spacer1   | emb LN881539.1 CCA  | 38 38   | 0                            | 3276 Clostridium phage phiCD505, complete genome   | putative portal protein                          |
| NC_009089_9_spacer11  | emb LN881536.1 CCA  | 35 33   | 2, 11, 21                    | 3840 Clostridium phage phiCD146, complete genome   | Conserved protein of unknown function            |
| NC_009089_9_spacer2   | emb NC_015262.1 CTA | 37 37   | 0                            | 61065 Clostridium phage phiCD3636, complete genome | putative DNase/helicase protein                  |
| NC_009089_9_spacer3   | emb LN881535.1 CTA  | 37 33   | 4, 5, 6, 15, 33              | 3309 Clostridium phage phiCD119, complete genome   | putative DNase/helicase protein                  |
| NC_009089_9_spacer4   | emb LN881536.1 TCC  | 36 36   | 0                            | 30715 Clostridium phage phiCD146, complete genome  | putative phage terminase, large subunit          |
| NC_013315_10_spacer10 | emb LN881537.1 CTA  | 37 32   | 5, 2, 3, 4, 7                | 14320 Clostridium phage phiCD211, complete genome  | Conserved protein of unknown function            |
| NC_013315_10_spacer11 | emb LN881537.1 TCC  | 37 32   | 5, 6, 9, 11, 12, 27          | 11782 Clostridium phage phiCD211, complete genome  | putative antirepressor                           |
| NC_013315_10_spacer14 | emb LN881539.1 CTA  | 37 37   | 0                            | 47022 Clostridium phage phiCD505, complete genome  | hypothetical protein                             |
| NC_013315_10_spacer15 | ref NC_013986.1 CCA | 35 33   | 2, 3, 9                      | 47316 Clostridium phage phiCD27, complete genome   | putative antirepressor                           |
| NC_013315_10_spacer16 | emb LN881539.1 CCA  | 38 35   | 4, 4, 7, 11, 28              | 24523 Clostridium phage phiCD146, complete genome  | Endonuclease                                     |
| NC_013315_10_spacer17 | emb LN881536.1 CCA  | 37 36   | 0                            | 33 Clostridium phage phiCD146, complete genome     | Conserved protein of unknown function            |
| NC_013315_10_spacer18 | ref NC_015262.1 CTA | 37 37   | 0                            | 61065 Clostridium phage phiCD3636, complete genome | putative para                                    |
| NC_013315_11_spacer3  | emb LN881539.1 CCA  | 38 37   | 2, 12                        | 32906 Clostridium phage phiCD505, complete genome  | putative DNase/helicase protein                  |
| NC_013315_11_spacer5  | ref NC_015568.1 CTA | 38 37   | 1                            | 8 Clostridium phage phiCD38-2, complete genome     | hypothetical protein                             |
| NC_013315_11_spacer7  | emb LN881535.1 TCC  | 37 36   | 1                            | 6 Clostridium phage phiCD119, complete genome      | Minor capsid protein                             |
| NC_013315_13_spacer1  | emb LN881539.1 CCA  | 38 37   | 7, 1, 4, 8, 11, 15, 31, 32   | 0015 Clostridium phage phiCD505, complete genome   | capsid protein                                   |
| NC_013315_13_spacer2  | emb NC_009171.CCA   | 36 30   | 6, 1, 2, 6, 15, 30, 36       | 2007 Clostridium phage phiCD119, complete genome   | Xkfd protein                                     |
| NC_013315_15_spacer10 | emb LN881538.1 CTA  | 37 37   | 0                            | 3004 Clostridium phage phiCD481-1, complete genome | Intergenic region                                |
| NC_013315_15_spacer11 | ENA CDH010000.CCA   | 37 36   | 1                            | 20 Clostridium phage phiCD505, complete genome     | no data                                          |
| NC_013315_15_spacer12 | emb LN881535.1 CTA  | 37 34   | 3, 17, 31, 31                | 9189 Clostridium phage phiCD119, complete genome   | Minor capsid protein                             |
| NC_013315_15_spacer13 | emb NC_015262.1 CTA | 38 38   | 0                            | 4418 Clostridium phage phiCD3636, complete genome  | Phage capsid family protein                      |
| NC_013315_15_spacer14 | ref NC_013986.1 CCA | 37 32   | 5, 5, 11, 25, 31, 33         | 7007 Clostridium phage phiCD27, complete genome    | putative site-specific recombinase               |
| NC_013315_15_spacer15 | emb LN881539.1 CCA  | 38 36   | 4, 8, 26, 29, 34             | 5009 Clostridium phage phiMM004, complete genome   | phage portal protein                             |
| NC_013315_16_spacer1  | emb LN881539.1 CCA  | 37 36   | 1                            | 23 Clostridium phage phiCD505, complete genome     | Conserved protein of unknown function            |
| NC_013315_16_spacer2  | emb LN881538.1 CCA  | 38 38   | 0                            | 5009 Clostridium phage phiCD505, complete genome   | Terminase small subunit                          |
| NC_013315_19_spacer13 | emb LN881537.1 CTA  | 37 37   | 1                            | 1 Clostridium phage phiCD211, complete genome      | Intergenic region                                |
| NC_013315_19_spacer14 | emb LN881537.1 CTA  | 37 37   | 0                            | 3004 Clostridium phage phiCD211, complete genome   | Conserved protein of unknown function            |
| NC_013315_19_spacer15 | emb LN881535.1 CCA  | 37 32   | 5, 3, 9, 23, 24, 25          | 4007 Clostridium phage phiCD119, complete genome   | Minor capsid protein                             |
| NC_013315_19_spacer16 | emb LN881539.1 CCA  | 38 37   | 0                            | 12962 Clostridium phage phiCD505, complete genome  | NtpC/P0 family protein                           |
| NC_013315_19_spacer17 | emb NC_015262.1 CTA | 38 34   | 4, 8, 11, 17, 26             | 5009 Clostridium phage phiCD3636, complete genome  | Xkfd protein                                     |
| NC_013315_19_spacer18 | ref NC_014921.1 CCA | 37 37   | 0                            | 10 Clostridium phage phiMM002, complete genome     | Intergenic region                                |
| NC_013315_20_spacer1  | emb LN881542.1 CCA  | 38 35   | 7, 6, 18, 19, 21, 29, 31, 33 | 7007 Clostridium phage phiMM003, complete genome   | Conserved protein of unknown function            |
| NC_013315_20_spacer2  | emb NC_015262.1 CTA | 36 29   | 4, 218, 33                   | 1000 Clostridium phage phiCD3636, complete genome  | Conserved protein of unknown function            |
| NC_013315_20_spacer3  | emb LN881537.1 CTA  | 37 32   | 4, 2, 2, 6, 22, 33, 37       | 8849 Clostridium phage phiCD211, complete genome   | Conserved protein of unknown function            |
| NC_013315_20_spacer4  | emb LN881537.1 CTA  | 36 35   | 1                            | 18 Clostridium phage phiCD211, complete genome     | Conserved protein of unknown function            |
| NC_013315_20_spacer5  | ref NC_015262.1 CTA | 37 32   | 5, 5, 2, 2, 4, 7             | 4007 Clostridium phage phiCD3636, complete genome  | putative phage terminase, large subunit          |
| NC_013316_10_spacer1  | emb LN881537.1 CTA  | 37 32   | 5, 6, 9, 11, 12, 27          | 4007 Clostridium phage phiCD211, complete genome   | Conserved protein of unknown function            |
| NC_013316_10_spacer14 | emb LN881539.1 CCA  | 37 32   | 5, 6, 9, 11, 12, 27          | 4007 Clostridium phage phiCD211, complete genome   | Conserved protein of unknown function            |
| NC_013316_10_spacer15 | emb LN881536.1 CCA  | 35 33   | 2, 3, 9                      | 4007 Clostridium phage phiCD27, complete genome    | hypothetical protein                             |
| NC_013316_10_spacer16 | emb LN881539.1 CCA  | 39 35   | 4, 4, 7, 11, 28              | 800 Clostridium phage phiCD119, complete genome    | Endonuclease                                     |
| NC_013316_10_spacer17 | emb LN881536.1 CCA  | 37 36   | 0                            | 33 Clostridium phage phiCD146, complete genome     | Conserved protein of unknown function            |
| NC_013316_10_spacer18 | ref NC_015262.1 CTA | 37 37   | 0                            | 61065 Clostridium phage phiCD3636, complete genome | putative para                                    |
| NC_013316_11_spacer1  | emb LN881540.1 CCA  | 36 34   | 2, 12                        | 29906 Clostridium phage phiCD505, complete genome  | putative DNase/helicase protein                  |
| NC_013316_11_spacer2  | emb LN881539.1 CCA  | 38 37   | 1                            | 8 Clostridium phage phiCD119, complete genome      | hypothetical protein                             |
| NC_013316_11_spacer3  | emb LN881535.1 TCC  | 37 36   | 1                            | 6 Clostridium phage phiCD119, complete genome      | Minor capsid protein                             |
| NC_013316_13_spacer1  | ref NC_017978.1 TCC | 36 29   | 7, 1, 4, 8, 11, 15, 31, 32   | 0015 Clostridium phage phiCD505, complete genome   | capsid protein                                   |
| NC_013316_13_spacer2  | ref NC_009171.CCA   | 36 30   | 6, 1, 2, 6, 15, 30, 36       | 2007 Clostridium phage phiCD119, complete genome   | Intergenic region                                |
| NC_013316_15_spacer10 | emb LN881538.1 CTA  | 37 37   | 0                            | 3004 Clostridium phage phiCD481-1, complete genome | Intergenic region                                |
| NC_013316_15_spacer11 | emb LN881539.1 CCA  | 37 34   | 3, 17, 31, 31                | 9189 Clostridium phage phiCD119, complete genome   | Minor capsid protein                             |
| NC_013316_15_spacer12 | emb NC_015262.1 CTA | 38 38   | 0                            | 4418 Clostridium phage phiCD3636, complete genome  | Phage capsid family protein                      |
| NC_013316_15_spacer13 | ref NC_013986.1 CCA | 37 32   | 5, 5, 11, 25, 31, 33         | 7007 Clostridium phage phiCD27, complete genome    | putative site-specific recombinase               |
| NC_013316_15_spacer14 | ref NC_015262.1 CTA | 36 35   | 1                            | 9 Clostridium phage phiCD3636, complete genome     | hypothetical protein                             |
| NC_013316_16_spacer1  | ref NC_014921.1 CCA | 38 36   | 4, 8, 26, 29, 34             | 5009 Clostridium phage phiMM004, complete genome   | phage portal protein                             |
| NC_013316_16_spacer2  | emb LN881539.1 CCA  | 37 36   | 1                            | 1 Clostridium phage phiCD505, complete genome      | Conserved protein of unknown function            |
| NC_013316_16_spacer3  | emb LN881537.1 CTA  | 38 33   | 5, 1, 2, 3, 4, 5             | 5002 Clostridium phage phiCD119, complete genome   | Terminase small subunit                          |
| NC_013316_19_spacer10 | ref NC_014921.1 CCA | 37 37   | 0                            | 10 Clostridium phage phiMM002, complete genome     | hypothetical protein                             |
| NC_013316_19_spacer12 | emb LN881539.1 CCA  | 38 35   | 9, 22, 12, 36                | 4007 Clostridium phage phiCD505, complete genome   | Conserved protein of unknown function            |
| NC_013316_19_spacer16 | emb LN881537.1 CTA  | 37 37   | 1                            | 1 Clostridium phage phiCD211, complete genome      | Intergenic region                                |
| NC_013316_19_spacer17 | emb LN881537.1 CTA  | 37 37   | 0                            | 3004 Clostridium phage phiCD211, complete genome   | Conserved protein of unknown function            |
| NC_013316_19_spacer21 | emb LN881535.1 CCA  | 37 32   | 5, 3, 9, 23, 24, 25          | 4007 Clostridium phage phiCD119, complete genome   | Minor capsid protein                             |
| NC_013316_19_spacer23 | emb LN881539.1 CCA  | 38 37   | 0                            | 12962 Clostridium phage phiCD505, complete genome  | NtpC/P0 family protein                           |
| NC_013316_19_spacer24 | emb NC_015262.1 CTA | 38 34   | 4, 8, 11, 17, 26             | 5009 Clostridium phage phiCD3636, complete genome  | Xkfd protein                                     |
| NC_013316_20_spacer1  | emb LN881542.1 CCA  | 36 29   | 7, 6, 18, 19, 21, 29, 31, 33 | 7007 Clostridium phage phiMM003, complete genome   | Conserved protein of unknown function            |
| NC_013316_20_spacer2  | emb NC_015262.1 CTA | 36 24   | 2, 17, 33                    | 8006 Clostridium phage phiCD3636, complete genome  | Conserved protein of unknown function            |
| NC_013316_20_spacer3  | emb LN881537.1 CTA  | 39 32   | 7                            | 4008 Clostridium phage phiCD481-1, complete genome | Intergenic region                                |
| NC_013316_20_spacer4  | emb LN881537.1 CTA  | 36 35   | 1                            | 18 Clostridium phage phiCD211, complete genome     | Conserved protein of unknown function            |
| NC_013316_20_spacer5  | emb NC_015262.1 CTA | 37 32   | 2, 18, 38                    | 9722 Clostridium phage phiCD211, complete genome   | Intergenic region                                |
| NC_013316_20_spacer6  | ref NC_015262.1 CTA | 37 34   | 2, 10, 11, 16                | 1009 Clostridium phage phiCD3636, complete genome  | Conserved protein of unknown function            |
| NC_013316_20_spacer7  | emb LN881537.1 CTA  | 36 33   | 3, 27, 29, 32                | 3009 Clostridium phage phiCD211, complete genome   | putative HTM-type transcriptional regulator ImmR |
| NC_013316_20_spacer8  | emb LN881539.1 CCA  | 36 32   | 4, 16, 31, 35, 36            | 7007 Clostridium phage phiCD119, complete genome   | Conserved protein of unknown function            |
| NC_013316_20_spacer9  | emb LN881536.1 CCA  | 37 37   | 0                            | 3004 Clostridium phage phiCD146, complete genome   | Tail tube measure                                |
| NC_013316_21_spacer13 | emb LN881539.1 CCA  | 37 37   | 0                            | 1467 Clostridium phage phiCD146, complete genome   | Tail tube measure                                |
| NC_013316_21_spacer16 | ref NC_014921.1 CCA | 36 31   | 5, 10, 12, 13, 15, 18        | 2006 Clostridium phage phiMM004, complete genome   | Tail tube measure                                |
| NC_013316_21_spacer18 | emb LN881539.1 CCA  | 37 36   | 1                            | 2 Clostridium phage phiMM004, complete genome      | cell wall hydrolase                              |
| NC_013316_21_spacer19 | ENA CDH010000.CCA   | 38 36   | 2, 4, 18                     | 3624 Clostridium phage phiCD119, complete genome   | Minor capsid protein                             |
| NC_013316_21_spacer21 | ENA CDH010000.CCT   | 37 36   | 1                            | 35 Clostridium phage phiCD52, contig2              | no data                                          |
| NC_013316_21_spacer22 | emb LN881538.1 CCA  | 37 34   | 3, 12, 30, 30                | 8002 Clostridium phage phiCD52, contig1            | no data                                          |
| NC_013316_21_spacer23 | ref NC_015262.1 CTA | 37 30   | 5, 1, 2, 16, 27, 30          | 9189 Clostridium phage phiCD146, complete genome   | Phage capsid family protein                      |
| NC_013316_21_spacer24 | emb LN881535.1 CTA  | 35 29   | 6, 1, 2, 3, 4, 5, 15         | 8009 Clostridium phage phiCD119, complete genome   | Conserved protein of unknown function            |
| NC_013316_21_spacer25 | emb LN881536.1 CCA  | 36 36   | 0                            | 1003 Clostridium phage phiCD146, complete genome   | Minor capsid protein                             |
| NC_013316_21_spacer26 | emb LN881535.1 CTA  | 34 32   | 2, 3, 9                      | 6002 Clostridium phage phiCD119, complete genome   | Tail tube measure                                |
| NC_013316_21_spacer27 | emb NC_009171.CCA   | 37 36   | 1                            | 20 Clostridium phage phiCD505, complete genome     | putative site-specific recombinase               |
| NC_013316_21_spacer28 | emb LN881535.1 CTA  | 38 36   | 1                            | 1003 Clostridium phage phiCD119, complete genome   | Conserved protein of unknown function            |
| NC_013316_21_spacer29 | emb LN881535.1 CTA  | 37 33   | 4, 1, 6, 7, 10               | 3009 Clostridium phage phiMM001, complete genome   | Tail tube measure                                |
| NC_013316_21_spacer30 | emb LN881541.1 CCA  | 36 31   | 5, 18, 20, 21, 30, 33        | 8649 Clostridium phage phiMM001, complete genome   | conserved chain tail protein                     |
| NC_013316_21_spacer31 | emb LN881539.1 CCA  | 36 31   | 5, 1, 2, 3, 4, 5             | 1003 Clostridium phage phiCD211, complete genome   | Conserved protein of unknown function            |
| NC_013316_21_spacer32 | ref NC_014921.1 CTA | 37 31   | 6, 4, 8, 14, 16, 21, 24      | 0011 Clostridium phage phiMM004, complete genome   | hypothetical protein                             |
| NC_013316_21_spacer33 | emb LN881537.1 CTA  | 36 36   | 0                            | 1517 Clostridium phage phiCD3636, complete genome  | Conserved protein of unknown function            |
| NC_013316_21_spacer34 | ref NC_0            |         |                              |                                                    |                                                  |

|                       |                     |    |    |   |                              |          |        |        |                                               |                                                            |                                                                                       |
|-----------------------|---------------------|----|----|---|------------------------------|----------|--------|--------|-----------------------------------------------|------------------------------------------------------------|---------------------------------------------------------------------------------------|
| NC_017174_5_spacer1   | ENA CDHE010000 CAA  | 37 | 36 | 0 | 1.00E-13                     | 100      | 6507   | 6542   | Clostridium phage phiCD52, contig1            | no data                                                    |                                                                                       |
| NC_017174_5_spacer10  | ref NC_015262.1 CTC | 36 | 36 | 3 | 1.9                          | 100      | 20562  | 20617  | Clostridium phage phiCD636, complete genome   | conserved protein of unknown function                      |                                                                                       |
| NC_017174_5_spacer13  | ref NC_015262.1 CAA | 37 | 32 | 6 | 1.2, 3, 10, 30, 36           | 2.00E-08 | 91.43  | 4262   | 4296                                          | Clostridium phage phiCD636, complete genome                | Phage capsid family protein                                                           |
| NC_017174_5_spacer17  | emb LN681538.1 CAA  | 36 | 32 | 4 | 3, 6, 15, 22                 | 3.00E-08 | 88.89  | 592    | 627                                           | Clostridium phage phiCD481-1, complete genome              | putative phage terminase, large subunit                                               |
| NC_017174_5_spacer2   | emb LN681539.1 CTC  | 37 | 35 | 2 | 2.0E-11                      | 94.59    | 32018  | 32054  | Clostridium phage phiCD505, complete genome   | Transcriptional regulator, BlnA/MecI/CoxP family           |                                                                                       |
| NC_017174_5_spacer3   | emb LN681541.1 CAA  | 37 | 37 | 0 | 1.0E-13                      | 100      | 32536  | 32536  | Clostridium phage phiCD481-1, complete genome | putative SPB-2 prophage-derived antirepressor protein yodP |                                                                                       |
| NC_017174_5_spacer4   | ref NC_019422.1 CTC | 36 | 34 | 2 | 8, 11                        | 1.00E-10 | 94.44  | 27308  | 27343                                         | Clostridium phage phiMMP04, complete genome                | hypothetical protein                                                                  |
| NC_017174_5_spacer7   | ref NC_015262.1 CAA | 36 | 36 | 0 | 2.0E-13                      | 100      | 2657   | 2692   | Clostridium phage phiCD636, complete genome   | Phage portal protein                                       |                                                                                       |
| NC_017174_5_spacer8   | emb LN681538.1 CTC  | 37 | 37 | 0 | 2.3, 17                      | 94.59    | 32018  | 32054  | Clostridium phage phiCD481-1, complete genome | conserved protein of unknown function                      |                                                                                       |
| NC_017174_5_spacer9   | ref NC_015262.1 CAA | 37 | 37 | 0 | 7.1, 2, 3, 4, 5, 6, 21       | 3.00E-09 | 96.77  | 694    | 724                                           | Clostridium phage phiCD481-1, complete genome              | putative phage terminase, large subunit                                               |
| NC_017174_6_spacer1   | ENA CDHE010000 CAA  | 38 | 37 | 1 | 26                           | 4.00E-13 | 97.37  | 11521  | 11528                                         | Clostridium phage phiCD52, contig1                         | no data                                                                               |
| NC_017174_6_spacer10  | ref NC_009917.1 CTC | 36 | 35 | 1 | 2.0E-13                      | 100      | 2395   | 2404   | Clostridium phage phiCD119, complete genome   | hypothetical protein                                       |                                                                                       |
| NC_017174_6_spacer11  | ENA CDHE010000 CTC  | 37 | 34 | 3 | 3, 36, 37                    | 2.00E-11 | 97.14  | 7372   | 7406                                          | Clostridium phage phiCD52, contig1                         | no data                                                                               |
| NC_017174_6_spacer12  | ref NC_009917.1 CAA | 37 | 30 | 7 | 4, 6, 25, 26, 27, 28, 37     | 3.00E-05 | 83.33  | 7291   | 7326                                          | Clostridium phage phiCD119, complete genome                | putative capsid protein                                                               |
| NC_017174_6_spacer13  | emb LN681534.1 CTC  | 37 | 31 | 6 | 23, 24, 25, 30, 36, 37       | 1.00E-07 | 88.57  | 30714  | 30748                                         | Clostridium phage phiCD24-1, complete genome               | N-acetyltransferase-L-alanine amidase                                                 |
| NC_017174_6_spacer14  | emb LN681535.1 CAA  | 37 | 36 | 1 | 1.0E-12                      | 100      | 28459  | 28459  | Clostridium phage phiCD505, complete genome   | no data                                                    |                                                                                       |
| NC_017174_6_spacer15  | ENA CDHE010000 CTC  | 39 | 36 | 3 | 3, 17, 23, 37                | 7.00E-11 | 92.31  | 12770  | 12770                                         | Clostridium phage phiCD52, contig1                         | no data                                                                               |
| NC_017174_6_spacer16  | ref NC_013988.1 CTC | 37 | 37 | 0 | 6.00E-14                     | 100      | 48599  | 48635  | Clostridium phage phiCD27, complete genome    | putative DNA-binding protein                               |                                                                                       |
| NC_017174_6_spacer17  | ENA CDHE010000 CTC  | 37 | 37 | 0 | 3.00E-14                     | 100      | 6069   | 6069   | Clostridium phage phiCD52, contig1            | no data                                                    |                                                                                       |
| NC_017174_6_spacer18  | emb LN681537.1 CTC  | 38 | 33 | 5 | 1, 2, 8, 20, 26              | 3.00E-09 | 91.67  | 41979  | 42014                                         | Clostridium phage phiCD211, complete genome                | conserved protein of unknown function                                                 |
| NC_017174_6_spacer19  | ref NC_009917.1 CTC | 35 | 31 | 4 | 1, 2, 17, 35                 | 1.0E-09  | 96.88  | 12605  | 12636                                         | Clostridium phage phiCD119, complete genome                | putative tape measure protein                                                         |
| NC_017174_6_spacer2   | emb LN681541.1 CAA  | 37 | 33 | 4 | 2, 34, 25                    | 5.00E-12 | 100    | 14004  | 14036                                         | Clostridium phage phiMMP01, complete genome                | Tail tape measure                                                                     |
| NC_017174_6_spacer22  | emb LN681539.1 CTC  | 37 | 36 | 1 | 4, 22, 25, 29, 35            | 9.00E-09 | 89.19  | 32660  | 32696                                         | Clostridium phage phiCD505, complete genome                | intergenic region                                                                     |
| NC_017174_6_spacer23  | emb LN681538.1 CAA  | 37 | 36 | 1 | 21                           | 1.00E-12 | 97.30  | 25906  | 25942                                         | Clostridium phage phiCD505, complete genome                | conserved protein of unknown function                                                 |
| NC_017174_6_spacer24  | emb LN681538.1 CTC  | 36 | 29 | 7 | 1, 2, 3, 4, 9, 18, 24        | 4.00E-07 | 90.63  | 9269   | 9300                                          | Clostridium phage phiCD481-1, complete genome              | conserved protein of unknown function                                                 |
| NC_017174_6_spacer25  | emb LN681535.1 CAA  | 37 | 30 | 7 | 7, 1, 7, 10, 15, 22, 23, 25  | 2.00E-04 | 81.08  | 28377  | 28413                                         | Clostridium phage phiCD211, complete genome                | Phage protein HK97 gp10 family                                                        |
| NC_017174_6_spacer27  | emb LN681538.1 CTC  | 37 | 37 | 0 | 3.00E-14                     | 100      | 6249   | 6285   | Clostridium phage phiCD481-1, complete genome | Tail fiber                                                 |                                                                                       |
| NC_017174_6_spacer28  | ref NC_019422.1 CTC | 38 | 38 | 0 | 2.00E-14                     | 100      | 15368  | 15405  | Clostridium phage phiMMP04, complete genome   | tail fiber                                                 |                                                                                       |
| NC_017174_6_spacer29  | emb LN681537.1 CTC  | 36 | 36 | 0 | 1.0E-12                      | 100      | 6262   | 6298   | Clostridium phage phiCD505, complete genome   | Clostridium protein, HK97 gp10 family                      |                                                                                       |
| NC_017174_6_spacer3   | ref NC_024144.1 CAA | 37 | 30 | 7 | 7, 8, 21, 31, 34, 35, 36, 37 | 2.00E-08 | 93.75  | 20854  | 20885                                         | Clostridium phage CDMH1, complete genome                   | putative baseplate-J protein                                                          |
| NC_017174_6_spacer31  | ENA CDHE010000 CTC  | 36 | 29 | 7 | 7, 8, 10, 32, 33, 34, 35, 36 | 3.00E-08 | 93.55  | 6313   | 6343                                          | Clostridium phage phiCD52, contig2                         | no data                                                                               |
| NC_017174_6_spacer32  | emb LN681538.1 CTC  | 37 | 37 | 0 | 3.0E-13                      | 100      | 30     | 30     | 30                                            | Clostridium phage phiCD2, complete genome                  | putative tail tape measure protein                                                    |
| NC_017174_6_spacer33  | ref NC_019422.1 CAA | 36 | 31 | 5 | 1, 2, 18, 20, 23             | 2.00E-07 | 88.57  | 13495  | 13529                                         | Clostridium phage phiMMP04, complete genome                | baseplate J-like assembly protein                                                     |
| NC_017174_6_spacer34  | emb LN681539.1 CAA  | 36 | 35 | 1 | 34                           | 5.00E-12 | 97.22  | 36578  | 36613                                         | Clostridium phage phiCD505, complete genome                | putative antirepressor                                                                |
| NC_017174_6_spacer35  | ENA CDHE010000 TAG  | 37 | 37 | 0 | 3.00E-14                     | 100      | 2081   | 2117   | Clostridium phage phiCD52, contig1            | no data                                                    |                                                                                       |
| NC_017174_6_spacer36  | emb LN681538.1 CTC  | 38 | 37 | 1 | 4.0E-13                      | 100      | 15825  | 15862  | Clostridium phage phiMMP04, complete genome   | putative LYM                                               |                                                                                       |
| NC_017174_6_spacer37  | ref NC_019422.1 CAA | 36 | 37 | 1 | 3.0E-14                      | 100      | 46819  | 46855  | Clostridium phage phiCD505, complete genome   | putative antirepressor                                     |                                                                                       |
| NC_017174_6_spacer38  | ref NC_019422.1 CTC | 37 | 32 | 5 | 1, 8, 10, 11, 35             | 6.00E-08 | 88.89  | 44713  | 44748                                         | Clostridium phage phiMMP02, complete genome                | hypothetical protein                                                                  |
| NC_017174_6_spacer39  | ENA CDHE010000 CTC  | 37 | 34 | 3 | 3, 17, 20, 23                | 5.00E-09 | 85.27  | 6527   | 6563                                          | Clostridium phage phiCD52, contig1                         | tail fiber                                                                            |
| NC_017174_7_spacer1   | ref NC_019422.1 CTC | 38 | 34 | 4 | 4, 6, 14, 23                 | 5.00E-09 | 89.47  | 18213  | 18250                                         | Clostridium phage phiMMP04, complete genome                | holin                                                                                 |
| NC_017174_7_spacer2   | ENA CDHE010000 CAA  | 36 | 30 | 6 | 1, 15, 21, 27, 30, 33        | 5.00E-06 | 85.71  | 7629   | 7663                                          | Clostridium phage phiCD52, contig1                         | no data                                                                               |
| NC_017174_7_spacer3   | emb LN681539.1 CAA  | 36 | 35 | 1 | 33                           | 5.00E-12 | 97.22  | 36588  | 36624                                         | Clostridium phage phiMMP03, complete genome                | conserved protein of unknown function                                                 |
| NC_017174_7_spacer4   | ref NC_009917.1 CAA | 36 | 31 | 5 | 5, 11, 17, 30, 32            | 2.00E-06 | 86.11  | 16695  | 16730                                         | Clostridium phage phiCD119, complete genome                | hypothetical protein                                                                  |
| NC_017174_7_spacer5   | emb LN681538.1 CTC  | 37 | 34 | 3 | 3, 9, 19, 25                 | 8.00E-10 | 91.43  | 13762  | 13798                                         | Clostridium phage phiCD481-1, complete genome              | Phage protein Xk45                                                                    |
| NC_017174_7_spacer6   | ref NC_019422.1 CAA | 36 | 35 | 1 | 18                           | 5.00E-02 | 97.22  | 68837  | 68873                                         | Conserved protein of unknown function                      | conserved protein of unknown function                                                 |
| NC_017174_8_spacer1   | emb LN681537.1 CAA  | 36 | 35 | 1 | 1.0E-13                      | 100      | 22882  | 22917  | Clostridium phage phiCD211, complete genome   | Tail tape measure                                          |                                                                                       |
| NC_017174_8_spacer14  | ref NC_017980.1 CTC | 34 | 27 | 7 | 1, 2, 19, 20, 21, 33, 34     | 3.00E-04 | 87.10  | 17610  | 17640                                         | Clostridium phage phiCD79, complete genome                 | hypothetical protein                                                                  |
| NC_017174_8_spacer15  | emb LN681538.1 CAA  | 36 | 35 | 1 | 30                           | 2.0E-12  | 92.32  | 22581  | 22615                                         | Clostridium phage phiCD211, complete genome                | Tail tape measure                                                                     |
| NC_017174_8_spacer16  | emb LN681537.1 CAA  | 36 | 36 | 0 | 1.0E-13                      | 100      | 20285  | 20320  | Clostridium phage phiCD211, complete genome   | protein of unknown function                                |                                                                                       |
| NC_017174_8_spacer17  | emb LN681537.1 CAA  | 36 | 36 | 0 | 1.0E-13                      | 100      | 19303  | 19338  | Clostridium phage phiCD211, complete genome   | protein of unknown function                                |                                                                                       |
| NC_017174_8_spacer18  | emb LN681537.1 CAA  | 36 | 35 | 1 | 5                            | 5.00E-12 | 97.22  | 36582  | 36618                                         | Clostridium phage phiCD211, complete genome                | protein of unknown function                                                           |
| NC_017174_8_spacer19  | emb LN681537.1 CAA  | 36 | 34 | 2 | 23, 14                       | 6.00E-11 | 94.44  | 33910  | 33945                                         | Clostridium phage phiCD211, complete genome                | protein of unknown function                                                           |
| NC_017174_8_spacer20  | emb LN681540.1 CAA  | 36 | 33 | 3 | 3, 31, 35, 36                | 6.00E-11 | 97.06  | 31845  | 31878                                         | Clostridium phage phiCD505, complete genome                | intergenic region                                                                     |
| NC_017174_8_spacer21  | emb LN681537.1 CAA  | 36 | 36 | 0 | 1.0E-13                      | 100      | 19303  | 19338  | Clostridium phage phiCD211, complete genome   | protein of unknown function                                |                                                                                       |
| NC_017174_8_spacer22  | emb LN681538.1 CTC  | 36 | 35 | 1 | 15                           | 5.00E-12 | 97.22  | 36578  | 36613                                         | Clostridium phage phiCD505, complete genome                | putative Crossover junction endodeoxyribonuclease                                     |
| NC_017174_8_spacer23  | emb LN681535.1 CTC  | 36 | 35 | 1 | 1.0E-13                      | 100      | 21182  | 21182  | Clostridium phage phiCD11, complete genome    | Tail fiber protein                                         |                                                                                       |
| NC_017174_8_spacer24  | emb LN681538.1 CAA  | 36 | 35 | 1 | 30                           | 5.00E-12 | 97.22  | 41179  | 41214                                         | Clostridium phage phiCD505, complete genome                | putative phage protein                                                                |
| NC_017174_8_spacer25  | ref NC_019506.1 CTC | 36 | 31 | 5 | 3, 8, 34, 35, 36             | 0.001    | 86.11  | 5735   | 5769                                          | Clostridium phage phiCD130, complete genome                | 3'-phosphoadenosine 5'-phosphosulfate sulfoltransferase/FAD synthetase-related enzyme |
| NC_017174_8_spacer26  | emb LN681537.1 CAA  | 36 | 36 | 0 | 1.0E-13                      | 100      | 52978  | 53021  | Clostridium phage phiMMP03, complete genome   | Phage integrase family prophage lambdaC801                 |                                                                                       |
| NC_017174_8_spacer27  | emb LN681537.1 CAA  | 36 | 34 | 2 | 218, 23                      | 6.00E-11 | 94.44  | 24355  | 24389                                         | Clostridium phage phiCD211, complete genome                | Tail tape measure                                                                     |
| NC_017175_10_spacer1  | emb LN681537.1 CAA  | 36 | 34 | 2 | 26, 20                       | 6.00E-11 | 94.44  | 117873 | 117908                                        | Clostridium phage phiCD211, complete genome                | protein of unknown function                                                           |
| NC_017175_10_spacer2  | emb LN681537.1 CAA  | 36 | 36 | 0 | 1.0E-13                      | 100      | 138981 | 139016 | Clostridium phage phiCD211, complete genome   | conserved protein of unknown function                      |                                                                                       |
| NC_017175_10_spacer3  | emb LN681535.1 CTC  | 35 | 31 | 4 | 3, 6, 25, 26                 | 1.00E-07 | 88.57  | 32949  | 32983                                         | Clostridium phage phiCD111, complete genome                | putative DNase/Helicase protein                                                       |
| NC_017175_10_spacer4  | emb LN681537.1 CAA  | 36 | 34 | 2 | 23, 36                       | 1.00E-12 | 100    | 45785  | 45818                                         | Clostridium phage phiCD211, complete genome                | putative cell wall hydrolase/autolysin                                                |
| NC_017175_10_spacer5  | emb LN681537.1 CAA  | 36 | 36 | 0 | 1.0E-13                      | 100      | 19303  | 19338  | Clostridium phage phiCD211, complete genome   | putative peptidoglycan-binding LYM                         |                                                                                       |
| NC_017175_6_spacer2   | ref NC_015262.1 CTC | 37 | 35 | 2 | 216, 22                      | 2.00E-11 | 94.59  | 1916   | 1952                                          | Clostridium phage phiCD111, complete genome                | Terminase large subunit                                                               |
| NC_017175_6_spacer3   | emb LN681536.1 CAA  | 38 | 38 | 0 | 7.00E-11                     | 95       | 29963  | 30002  | Clostridium phage phiCD146, complete genome   | intergenic region                                          |                                                                                       |
| NC_017175_6_spacer4   | ref NC_013988.1 CTC | 36 | 36 | 0 | 2.0E-13                      | 100      | 22207  | 22242  | Clostridium phage phiCD27, complete genome    | hypothetical protein                                       |                                                                                       |
| NC_017175_6_spacer5   | ref NC_019414.1 CAA | 37 | 37 | 0 | 1.0E-13                      | 100      | 45157  | 45192  | Clostridium phage CDMH1, complete genome      | hypothetical protein                                       |                                                                                       |
| NC_017175_6_spacer6   | ref NC_015262.1 CAA | 37 | 35 | 2 | 3, 24                        | 3.00E-11 | 94.59  | 27126  | 27162                                         | Clostridium phage phiCD636, complete genome                | putative DNase/Helicase protein                                                       |
| NC_017175_6_spacer7   | emb LN681538.1 CAA  | 36 | 35 | 1 | 18                           | 5.00E-12 | 97.22  | 3762   | 3797                                          | Clostridium phage phiCD481-1, complete genome              | Phage protein Xk45                                                                    |
| NC_017175_6_spacer8   | ref NC_019422.1 CTC | 36 | 36 | 0 | 2, 10                        | 1.0E-05  | 92.32  | 16005  | 16040                                         | Clostridium phage phiMMP01, complete genome                | putative LYM                                                                          |
| NC_017175_9_spacer1   | ref NC_017980.1 CTC | 37 | 36 | 1 | 1.0E-13                      | 100      | 14215  | 14250  | Clostridium phage phiMMP01, complete genome   | Tail tape measure                                          |                                                                                       |
| NC_017175_9_spacer2   | ref NC_024144.1 CAA | 37 | 37 | 0 | 10                           | 1.0E-10  | 100    | 13828  | 13864                                         | Clostridium phage CDMH1, complete genome                   | hypothetical protein                                                                  |
| NC_017178_10_spacer10 | ref NC_015262.1 CTC | 37 | 32 | 5 | 1, 2, 3, 4, 7                | 4.00E-07 | 86.49  | 14320  | 14356                                         | Clostridium phage phiCD636, complete genome                | putative phage terminase, large subunit                                               |
| NC_017178_10_spacer11 | emb LN681537.1 CTC  | 37 | 32 | 5 | 5, 9, 11, 12, 27             | 4.00E-07 | 86.49  | 117822 | 117858                                        | Clostridium phage phiCD211, complete genome                | protein of unknown function                                                           |
| NC_017178_10_spacer14 | emb LN681539.1 CTC  | 37 | 37 | 0 | 3.0E-14                      | 100      | 47022  | 47058  | Clostridium phage phiCD505, complete genome   | putative antirepressor                                     |                                                                                       |
| NC_017178_10_spacer15 | ref NC_013988.1 CAA | 35 | 33 | 2 | 3, 9                         | 4.00E-10 | 94.29  | 47316  | 47350                                         | Clostridium phage phiCD27, complete genome                 | hypothetical protein                                                                  |
| NC_017178_10_spacer16 | emb LN681538.1 CAA  | 37 | 37 | 0 | 1.0E-13                      | 100      | 80074  | 80110  | Clostridium phage phiCD111, complete genome   | Endolysine                                                 |                                                                                       |
| NC_017178_10_spacer17 | emb LN681           |    |    |   |                              |          |        |        |                                               |                                                            |                                                                                       |



Hits to plasmids

| query_name            | hit_name       | PAM | query_length | num_identical | N of mismatches   | mismatches   significance | percent_identity | hit_start | hit_end | description                                                                    |
|-----------------------|----------------|-----|--------------|---------------|-------------------|---------------------------|------------------|-----------|---------|--------------------------------------------------------------------------------|
| NC_009089_7_spacer3   | emb FN668943.1 | CCA | 37           | 37            | 0                 | 6.00E-11                  | 100              | 118718    | 118754  | Clostridium difficile B1 putative phage or plasmid sequence, complete sequence |
| NC_009089_9_spacer6   | emb FN668942.1 | CCA | 36           | 36            | 0                 | 2.00E-10                  | 100              | 3429      | 3464    | Clostridium difficile B1 plasmid pCDB1, complete sequence                      |
| NC_013316_15_spacer10 | emb AM180356.1 | CCG | 37           | 35            | 2 27, 37          | 6.00E-08                  | 97.22            | 164       | 199     | Clostridium difficile 630 plasmid pCD630, complete replicon                    |
| NC_013316_15_spacer10 | emb AM180356.1 | CCG | 37           | 35            | 2 27, 37          | 6.00E-08                  | 97.22            | 164       | 199     | Clostridium difficile 630 plasmid pCD630, complete replicon                    |
| NC_013316_19_spacer1  | emb FN668942.1 | CCA | 39           | 39            | 0                 | 4.00E-12                  | 100              | 35011     | 35049   | Clostridium difficile B1 plasmid pCDB1, complete sequence                      |
| NC_013316_19_spacer2  | emb FN668942.1 | CCT | 36           | 36            | 0                 | 2.00E-10                  | 100              | 38136     | 38171   | Clostridium difficile B1 plasmid pCDB1, complete sequence                      |
| NC_013974_12_spacer7  | emb FN668942.1 | GCA | 37           | 33            | 4 1, 2, 3, 4      | 1.00E-08                  | 100              | 28536     | 28568   | Clostridium difficile B1 plasmid pCDB1, complete sequence                      |
| NC_013974_7_spacer4   | emb FN668943.1 | CAA | 36           | 36            | 0                 | 2.00E-10                  | 100              | 208600    | 208635  | Clostridium difficile B1 putative phage or plasmid sequence, complete sequence |
| NC_013974_8_spacer1   | emb FN668943.1 | CCA | 38           | 34            | 4 13, 16, 17, 21  | 0.056                     | 89.47            | 253455    | 253492  | Clostridium difficile B1 putative phage or plasmid sequence, complete sequence |
| NC_017173_10_spacer2  | emb FN668943.1 | CCT | 36           | 31            | 5 1, 2, 11, 22, 1 | 0.05                      | 91.18            | 106661    | 106694  | Clostridium difficile B1 putative phage or plasmid sequence, complete sequence |
| NC_017173_10_spacer11 | emb AM180356.1 | GCT | 37           | 36            | 1 18              | 1.00E-08                  | 97.30            | 621       | 657     | Clostridium difficile 630 plasmid pCD630, complete replicon                    |
| NC_017174_12_spacer6  | emb FN668942.1 | TCT | 34           | 31            | 3 4, 5, 30        | 0.043                     | 91.18            | 16616     | 16649   | Clostridium difficile B1 plasmid pCDB1, complete sequence                      |
| NC_017174_3_spacer2   | emb AM180356.1 | CCA | 38           | 34            | 4 1, 2, 3, 15     | 2.00E-07                  | 97.14            | 2068      | 2102    | Clostridium difficile 630 plasmid pCD630, complete replicon                    |
| NC_017174_3_spacer3   | emb AM180356.1 | CCA | 38           | 38            | 0                 | 2.00E-11                  | 100              | 1237      | 1274    | Clostridium difficile 630 plasmid pCD630, complete replicon                    |
| NC_017174_3_spacer5   | emb FN668942.1 | CCT | 37           | 34            | 3 13, 36, 37      | 2.00E-07                  | 97.14            | 24874     | 24908   | Clostridium difficile B1 plasmid pCDB1, complete sequence                      |
| NC_017174_3_spacer6   | gb AF350745.1  | CCA | 37           | 33            | 4 1, 2, 36, 37    | 1.00E-08                  | 100              | 6390      | 6422    | Clostridium difficile plasmid pCD6, complete sequence                          |
| NC_017174_3_spacer9   | emb FN668943.1 | CCA | 37           | 34            | 3 18, 21, 37      | 4.00E-06                  | 94.44            | 134856    | 134891  | Clostridium difficile B1 putative phage or plasmid sequence, complete sequence |
| NC_017174_6_spacer14  | emb FN668942.1 | CCA | 37           | 37            | 0                 | 6.00E-11                  | 100              | 19253     | 19289   | Clostridium difficile B1 plasmid pCDB1, complete sequence                      |
| NC_017174_6_spacer20  | emb AM180356.1 | CCT | 36           | 36            | 0                 | 2.00E-10                  | 100              | 1579      | 1614    | Clostridium difficile 630 plasmid pCD630, complete replicon                    |
| NC_017174_6_spacer21  | emb AM180356.1 | TCT | 37           | 31            | 6 22, 25, 29, 35  | 0.053                     | 91.18            | 816       | 849     | Clostridium difficile 630 plasmid pCD630, complete replicon                    |
| NC_017174_6_spacer28  | emb FN668942.1 | CCC | 38           | 37            | 1 27              | 4.00E-09                  | 97.37            | 15348     | 15385   | Clostridium difficile B1 plasmid pCDB1, complete sequence                      |
| NC_017174_6_spacer37  | emb FN668942.1 | CCA | 36           | 31            | 5 1, 2, 3, 21, 24 | 8.00E-04                  | 93.94            | 13478     | 13510   | Clostridium difficile B1 plasmid pCDB1, complete sequence                      |
| NC_017174_7_spacer10  | emb FN668942.1 | CCT | 38           | 34            | 4 6, 9, 14, 21    | 0.056                     | 89.47            | 18536     | 18573   | Clostridium difficile B1 plasmid pCDB1, complete sequence                      |
| NC_017174_7_spacer7   | emb FN668942.1 | CCT | 36           | 36            | 0                 | 2.00E-10                  | 100              | 400       | 455     | Clostridium difficile B1 plasmid pCDB1, complete sequence                      |
| NC_017178_15_spacer10 | emb AM180356.1 | CCG | 37           | 35            | 2 26, 37          | 6.00E-08                  | 97.22            | 164       | 199     | Clostridium difficile 630 plasmid pCD630, complete replicon                    |
| NC_017179_15_spacer10 | emb AM180356.1 | CCG | 37           | 35            | 2 26, 37          | 6.00E-08                  | 97.22            | 164       | 199     | Clostridium difficile 630 plasmid pCD630, complete replicon                    |

**Table S2. (C) Phage targeting by several CRISPR spacers.**

Several spacers within CRISPR array targeting the same phage are indicated by the same colour. The first column includes the name of the strain\_array number\_spacer number.

| query_name              | hit_name         | query_length | num_identical | PAM | N of mismatches | mismatches positions      | description                                      |
|-------------------------|------------------|--------------|---------------|-----|-----------------|---------------------------|--------------------------------------------------|
| <b>C.difficile M120</b> |                  |              |               |     |                 |                           |                                                  |
| NC_017174_12_spacer4    | ref NC_024144.1  | 36           | 35            | CCA | 1               |                           | 6 Clostridium phage CDMH1 complete genome        |
| NC_017174_12_spacer6    | ref NC_024144.1  | 34           | 30            | CCT | 4               | 1, 8, 9, 25               | Clostridium phage CDMH1 complete genome          |
| NC_017174_12_spacer7    | ref NC_024144.1  | 36           | 35            | CCT | 1               |                           | 24 Clostridium phage CDMH1 complete genome       |
| NC_017174_12_spacer27   | ref NC_024144.1  | 37           | 35            | TCT | 2               | 1, 22                     | Clostridium phage CDMH1 complete genome          |
| NC_017174_12_spacer6    | ref NC_007917.1  | 34           | 30            | CCT | 4               | 1, 8, 9, 25               | Clostridium phage phi CD119, complete genome     |
| NC_017174_12_spacer7    | ref NC_007917.1  | 36           | 35            | CCT | 1               |                           | 24 Clostridium phage phi CD119, complete genome  |
| NC_017174_12_spacer8    | ref NC_007917.1  | 37           | 34            | CCT | 3               | 1, 2, 21                  | Clostridium phage phi CD119, complete genome     |
| NC_017174_12_spacer9    | ref NC_007917.1  | 38           | 31            | CCT | 7               | 5, 6, 24, 27, 36, 37, 38  | Clostridium phage phi CD119, complete genome     |
| NC_017174_12_spacer13   | ref NC_007917.1  | 36           | 32            | CTA | 4               | 13, 117, 23, 29           | Clostridium phage phi CD119, complete genome     |
| NC_017174_12_spacer26   | ref NC_007917.1  | 37           | 34            | TCT | 3               | 25, 28, 34                | Clostridium phage phi CD119, complete genome     |
| NC_017174_12_spacer27   | ref NC_007917.1  | 37           | 35            | TCT | 2               | 1, 22                     | Clostridium phage phi CD119, complete genome     |
| NC_017174_12_spacer4    | ref NC_009231.1  | 36           | 35            | CCA | 1               |                           | 6 Clostridium phage phiC2, complete genome       |
| NC_017174_12_spacer6    | ref NC_009231.1  | 34           | 31            | TTC | 3               | 1, 8, 9                   | Clostridium phage phiC2, complete genome         |
| NC_017174_12_spacer7    | ref NC_009231.1  | 36           | 35            | CCT | 1               |                           | 24 Clostridium phage phiC2, complete genome      |
| NC_017174_12_spacer9    | ref NC_009231.1  | 38           | 31            | CCT | 7               | 5, 6, 24, 27, 36, 37, 38  | Clostridium phage phiC2, complete genome         |
| NC_017174_12_spacer19   | ref NC_009231.1  | 35           | 28            | CCA | 7               | 1, 2, 6, 13, 14, 16, 35   | Clostridium phage phiC2, complete genome         |
| NC_017174_12_spacer24   | emb LN681535.1   | 36           | 32            | CCA | 4               | 5, 9, 14, 22              | Clostridium phage phiCD111, complete genome      |
| NC_017174_12_spacer29   | emb LN681535.1   | 36           | 36            | CCT | 0               |                           | Clostridium phage phiCD111, complete genome      |
| NC_017174_12_spacer18   | emb LN681537.1   | 36           | 29            | CAA | 7               | 1, 2, 3, 4, 5, 6, 31      | Clostridium phage phiCD211, complete genome      |
| NC_017174_12_spacer19   | emb LN681537.1   | 35           | 32            | CCA | 3               | 1, 21, 30                 | Clostridium phage phiCD211, complete genome      |
| NC_017174_12_spacer28   | emb LN681537.1   | 36           | 33            | CCA | 3               | 3, 21, 33                 | Clostridium phage phiCD211, complete genome      |
| NC_017174_12_spacer30   | emb LN681537.1   | 37           | 37            | CCT | 0               |                           | Clostridium phage phiCD211, complete genome      |
| NC_017174_12_spacer6    | ref NC_011398.1  | 34           | 30            | TTC | 4               | 1, 8, 9, 25               | Clostridium phage phiCD27, complete genome       |
| NC_017174_12_spacer19   | ref NC_011398.1  | 35           | 28            | CCA | 7               | 1, 2, 6, 13, 14, 16, 35   | Clostridium phage phiCD27, complete genome       |
| NC_017174_12_spacer6    | emb LN681538.1   | 34           | 32            | CCT | 2               | 16, 17                    | Clostridium phage phiCD481-1, complete genome    |
| NC_017174_12_spacer8    | emb LN681538.1   | 37           | 34            | CCT | 3               | 1, 2, 21                  | Clostridium phage phiCD481-1, complete genome    |
| NC_017174_12_spacer11   | emb LN681538.1   | 37           | 36            | GCT | 1               |                           | 18 Clostridium phage phiCD481-1, complete genome |
| NC_017174_12_spacer12   | emb LN681538.1   | 36           | 36            | CCT | 0               |                           | Clostridium phage phiCD481-1, complete genome    |
| NC_017174_12_spacer13   | emb LN681538.1   | 36           | 33            | CTA | 3               | 13, 17, 23                | Clostridium phage phiCD481-1, complete genome    |
| NC_017174_12_spacer14   | emb LN681538.1   | 36           | 36            | CCA | 0               |                           | Clostridium phage phiCD481-1, complete genome    |
| NC_017174_12_spacer24   | emb LN681538.1   | 36           | 33            | CCA | 3               | 5, 9, 22                  | Clostridium phage phiCD481-1, complete genome    |
| NC_017174_12_spacer26   | emb LN681538.1   | 37           | 33            | TCT | 4               | 19, 22, 34, 37            | Clostridium phage phiCD481-1, complete genome    |
| NC_017174_12_spacer3    | emb LN681539.1   | 36           | 34            | CCT | 2               | 24, 27                    | Clostridium phage phiCD505, complete genome      |
| NC_017174_12_spacer6    | emb LN681539.1   | 34           | 30            | TTC | 4               | 3, 8, 15, 17              | Clostridium phage phiCD505, complete genome      |
| NC_017174_12_spacer7    | emb LN681539.1   | 36           | 35            | CCT | 1               |                           | 24 Clostridium phage phiCD505, complete genome   |
| NC_017174_12_spacer8    | emb LN681540.1   | 37           | 33            | CCT | 4               | 1, 2, 6, 21               | Clostridium phage phiCD506, complete genome      |
| NC_017174_12_spacer11   | emb LN681540.1   | 37           | 36            | GCT | 1               |                           | 18 Clostridium phage phiCD506, complete genome   |
| NC_017174_12_spacer12   | emb LN681540.1   | 36           | 36            | CCT | 0               |                           | Clostridium phage phiCD506, complete genome      |
| NC_017174_12_spacer13   | emb LN681540.1   | 36           | 33            | CTA | 3               | 13, 17, 23                | Clostridium phage phiCD506, complete genome      |
| NC_017174_12_spacer5    | ENA CDIE01000001 | 37           | 37            | ?   | 0               |                           | Clostridium phage phiCD52_contig1                |
| NC_017174_12_spacer7    | ENA CDIE01000001 | 36           | 36            | ?   | 0               |                           | Clostridium phage phiCD52_contig1                |
| NC_017174_12_spacer9    | ENA CDIE01000001 | 38           | 32            | ?   | 6               | 5, 6, 24, 36, 37, 38      | Clostridium phage phiCD52_contig1                |
| NC_017174_12_spacer21   | ref NC_015262.1  | 35           | 31            | GCA | 4               | 4, 11, 23, 25             | Clostridium phage phiCD6356, complete genome     |
| NC_017174_12_spacer25   | ref NC_015262.1  | 36           | 34            | CCG | 2               | 8, 9                      | Clostridium phage phiCD6356, complete genome     |
| NC_017174_12_spacer4    | emb LN681541.1   | 36           | 35            | CCA | 1               |                           | 6 Clostridium phage phiMMP0, complete genome     |
| NC_017174_12_spacer7    | emb LN681541.1   | 36           | 36            | CCT | 0               |                           | Clostridium phage phiMMP0, complete genome       |
| NC_017174_12_spacer3    | ref NC_019421.1  | 36           | 34            | CCT | 2               | 24, 27                    | Clostridium phage phiMMP02, complete genome      |
| NC_017174_12_spacer6    | ref NC_019421.1  | 34           | 31            | TTC | 3               | 1, 8, 9                   | Clostridium phage phiMMP02, complete genome      |
| NC_017174_12_spacer7    | ref NC_019421.1  | 36           | 34            | CCT | 2               | 5, 25                     | Clostridium phage phiMMP02, complete genome      |
| NC_017174_12_spacer9    | ref NC_019421.1  | 38           | 31            | CCT | 7               | 5, 6, 24, 27, 36, 37, 38  | Clostridium phage phiMMP02, complete genome      |
| NC_017174_12_spacer4    | emb LN681542.1   | 36           | 35            | CCA | 1               |                           | 6 Clostridium phage phiMMP03, complete genome    |
| NC_017174_12_spacer6    | emb LN681542.1   | 34           | 30            | TTC | 4               | 3, 8, 15, 17              | Clostridium phage phiMMP03, complete genome      |
| NC_017174_12_spacer7    | emb LN681542.1   | 36           | 35            | CCT | 1               |                           | 24 Clostridium phage phiMMP03, complete genome   |
| NC_017174_12_spacer9    | emb LN681542.1   | 38           | 31            | CCT | 7               | 5, 6, 24, 27, 36, 37, 38  | Clostridium phage phiMMP03, complete genome      |
| NC_017174_12_spacer8    | ref NC_019422.1  | 37           | 33            | CCT | 4               | 1, 2, 6, 21               | Clostridium phage phiMMP04, complete genome      |
| NC_017174_12_spacer12   | ref NC_019422.1  | 36           | 36            | CCT | 0               |                           | Clostridium phage phiMMP04, complete genome      |
| NC_017174_12_spacer14   | ref NC_019422.1  | 36           | 36            | CCA | 0               |                           | Clostridium phage phiMMP04, complete genome      |
| NC_017174_12_spacer17   | ref NC_019422.1  | 37           | 37            | CCT | 0               |                           | Clostridium phage phiMMP04, complete genome      |
| NC_017174_12_spacer22   | ref NC_019422.1  | 36           | 35            | CCT | 1               |                           | 15 Clostridium phage phiMMP04, complete genome   |
| NC_017174_12_spacer24   | ref NC_019422.1  | 36           | 33            | CCA | 3               | 5, 9, 23                  | Clostridium phage phiMMP04, complete genome      |
| NC_017174_5_spacer3     | ref NC_009231.1  | 37           | 37            | CCA | 0               |                           | Clostridium phage phiC2, complete genome         |
| NC_017174_5_spacer10    | ref NC_009231.1  | 37           | 31            | CCT | 6               | 1, 2, 3, 4, 9, 30         | Clostridium phage phiC2, complete genome         |
| NC_017174_5_spacer8     | emb LN681538.1   | 37           | 35            | CCG | 2               | 3, 17                     | Clostridium phage phiCD481-1, complete genome    |
| NC_017174_5_spacer9     | emb LN681538.1   | 37           | 30            | CCT | 7               | 1, 2, 3, 4, 5, 6, 21      | Clostridium phage phiCD481-1, complete genome    |
| NC_017174_5_spacer17    | emb LN681538.1   | 36           | 32            | CCA | 4               | 3, 6, 15, 22              | Clostridium phage phiCD481-1, complete genome    |
| NC_017174_5_spacer8     | emb LN681540.1   | 37           | 35            | CCG | 2               | 3, 17                     | Clostridium phage phiCD506, complete genome      |
| NC_017174_5_spacer9     | emb LN681540.1   | 37           | 30            | CCT | 7               | 1, 2, 3, 4, 5, 6, 21      | Clostridium phage phiCD506, complete genome      |
| NC_017174_5_spacer17    | emb LN681540.1   | 36           | 32            | CCA | 4               | 3, 6, 15, 22              | Clostridium phage phiCD506, complete genome      |
| NC_017174_5_spacer7     | ref NC_015262.1  | 36           | 36            | CCA | 0               |                           | Clostridium phage phiCD6356, complete genome     |
| NC_017174_5_spacer10    | ref NC_015262.1  | 37           | 34            | CCT | 3               | 4, 9, 30                  | Clostridium phage phiCD6356, complete genome     |
| NC_017174_5_spacer13    | ref NC_015262.1  | 38           | 32            | CCC | 6               | 1, 2, 3, 10, 30, 36       | Clostridium phage phiCD6356, complete genome     |
| NC_017174_5_spacer4     | ref NC_019422.1  | 36           | 34            | TCT | 2               | 8, 11                     | Clostridium phage phiMMP04, complete genome      |
| NC_017174_5_spacer8     | ref NC_019422.1  | 37           | 35            | CCG | 2               | 3, 17                     | Clostridium phage phiMMP04, complete genome      |
| NC_017174_5_spacer9     | ref NC_019422.1  | 37           | 35            | CCT | 2               | 6, 27                     | Clostridium phage phiMMP04, complete genome      |
| NC_017174_6_spacer4     | emb LN681539.1   | 36           | 35            | CCA | 1               |                           | 34 Clostridium phage phiCD505, complete genome   |
| NC_017174_6_spacer6     | emb LN681539.1   | 37           | 37            | CCA | 0               |                           | Clostridium phage phiCD505, complete genome      |
| NC_017174_6_spacer14    | emb LN681539.1   | 37           | 36            | CCA | 1               |                           | 15 Clostridium phage phiCD505, complete genome   |
| NC_017174_6_spacer22    | emb LN681539.1   | 37           | 36            | CCA | 1               |                           | 21 Clostridium phage phiCD505, complete genome   |
| NC_017174_6_spacer14    | emb LN681540.1   | 37           | 36            | CCA | 1               |                           | 15 Clostridium phage phiCD506, complete genome   |
| NC_017174_6_spacer21    | emb LN681540.1   | 37           | 33            | TCT | 4               | 22, 25, 29, 35            | Clostridium phage phiCD506, complete genome      |
| NC_017174_6_spacer24    | emb LN681540.1   | 36           | 29            | CCT | 7               | 1, 2, 3, 4, 9, 18, 24     | Clostridium phage phiCD506, complete genome      |
| NC_017174_6_spacer27    | emb LN681540.1   | 37           | 37            | CCA | 0               |                           | Clostridium phage phiCD506, complete genome      |
| NC_017174_6_spacer29    | emb LN681540.1   | 36           | 36            | CCT | 0               |                           | Clostridium phage phiCD506, complete genome      |
| NC_017174_6_spacer14    | ENA CDIE01000002 | 37           | 36            | ?   | 1               |                           | 15 Clostridium phage phiCD52_contig2             |
| NC_017174_6_spacer17    | ENA CDIE01000002 | 37           | 37            | ?   | 0               |                           | Clostridium phage phiCD52_contig2                |
| NC_017174_6_spacer31    | ENA CDIE01000002 | 36           | 29            | ?   | 7               | 8, 10, 32, 33, 34, 35, 36 | Clostridium phage phiCD52_contig2                |
| NC_017174_6_spacer1     | ENA CDIE01000001 | 38           | 37            | ?   | 1               |                           | 26 Clostridium phage phiCD52_contig1             |

|                        |                  |    |        |                              |                                                  |
|------------------------|------------------|----|--------|------------------------------|--------------------------------------------------|
| NC_017174_6_spacer6    | ENA CDIE01000001 | 37 | 37 ?   | 0                            | Clostridium phage phiCD52_contig1                |
| NC_017174_6_spacer9    | ENA CDIE01000001 | 37 | 34 ?   | 3 17, 20, 23                 | Clostridium phage phiCD52_contig1                |
| NC_017174_6_spacer11   | ENA CDIE01000001 | 37 | 34 ?   | 3 3, 36, 37                  | Clostridium phage phiCD52_contig1                |
| NC_017174_6_spacer15   | ENA CDIE01000001 | 39 | 36 ?   | 3 17, 23, 37                 | Clostridium phage phiCD52_contig1                |
| NC_017174_6_spacer41   | ENA CDIE01000001 | 37 | 37 ?   | 0                            | Clostridium phage phiCD52_contig1                |
| NC_017174_6_spacer2    | emb LN681541.1   | 35 | 33 CCA | 2 34, 35                     | Clostridium phage phiMMP01, complete genome      |
| NC_017174_6_spacer5    | emb LN681541.1   | 38 | 37 CTG | 1                            | 29 Clostridium phage phiMMP01, complete genome   |
| NC_017174_6_spacer14   | emb LN681541.1   | 37 | 36 CCA | 1                            | 15 Clostridium phage phiMMP01, complete genome   |
| NC_017174_6_spacer17   | emb LN681541.1   | 37 | 37 CCT | 0                            | Clostridium phage phiMMP01, complete genome      |
| NC_017174_6_spacer31   | emb LN681541.1   | 36 | 29 CTT | 7 8, 10, 32, 33, 34, 35, 36  | Clostridium phage phiMMP01, complete genome      |
| NC_017174_6_spacer7    | ref NC_019421.1  | 37 | 32 CTA | 5 1, 8, 10, 11, 35           | Clostridium phage phiMMP02, complete genome      |
| NC_017174_6_spacer14   | ref NC_019421.1  | 37 | 36 CCA | 1                            | 15 Clostridium phage phiMMP02, complete genome   |
| NC_017174_6_spacer15   | ref NC_019421.1  | 39 | 36 TCT | 3 4, 19, 37                  | Clostridium phage phiMMP02, complete genome      |
| NC_017174_6_spacer18   | ref NC_019421.1  | 38 | 33 TTT | 5 14, 17, 20, 26, 29         | Clostridium phage phiMMP02, complete genome      |
| NC_017174_6_spacer2    | emb LN681542.1   | 35 | 33 CCA | 2 34, 35                     | Clostridium phage phiMMP03, complete genome      |
| NC_017174_6_spacer4    | emb LN681542.1   | 36 | 35 CCA | 1                            | 34 Clostridium phage phiMMP03, complete genome   |
| NC_017174_6_spacer5    | emb LN681542.1   | 38 | 37 CTG | 1                            | 29 Clostridium phage phiMMP03, complete genome   |
| NC_017174_6_spacer6    | emb LN681542.1   | 37 | 37 CCA | 0                            | Clostridium phage phiMMP03, complete genome      |
| NC_017174_6_spacer14   | emb LN681542.1   | 37 | 36 CCA | 1                            | 15 Clostridium phage phiMMP03, complete genome   |
| NC_017174_6_spacer17   | emb LN681542.1   | 37 | 37 CCT | 0                            | Clostridium phage phiMMP03, complete genome      |
| NC_017174_6_spacer22   | emb LN681542.1   | 37 | 36 CCA | 1                            | 21 Clostridium phage phiMMP03, complete genome   |
| NC_017174_6_spacer14   | ref NC_019422.1  | 37 | 36 CCA | 1                            | 9 Clostridium phage phiMMP04, complete genome    |
| NC_017174_6_spacer18   | ref NC_019422.1  | 38 | 31 TTT | 7 17, 20, 23, 24, 25, 29, 35 | Clostridium phage phiMMP04, complete genome      |
| NC_017174_6_spacer21   | ref NC_019422.1  | 37 | 32 TCT | 5 22, 25, 29, 30, 35         | Clostridium phage phiMMP04, complete genome      |
| NC_017174_6_spacer24   | ref NC_019422.1  | 36 | 30 CCA | 6 1, 2, 3, 4, 10, 12         | Clostridium phage phiMMP04, complete genome      |
| NC_017174_6_spacer27   | ref NC_019422.1  | 37 | 31 CCA | 6 1, 2, 8, 11, 13, 35        | Clostridium phage phiMMP04, complete genome      |
| NC_017174_6_spacer28   | ref NC_019422.1  | 38 | 38 CCC | 0                            | Clostridium phage phiMMP04, complete genome      |
| NC_017174_6_spacer29   | ref NC_019422.1  | 36 | 33 CCT | 3 3, 23, 30                  | Clostridium phage phiMMP04, complete genome      |
| NC_017174_6_spacer37   | ref NC_019422.1  | 36 | 31 CCA | 5 1, 12, 18, 20, 23          | Clostridium phage phiMMP04, complete genome      |
| NC_017174_6_spacer2    | ref NC_024144.1  | 35 | 35 CCA | 0                            | Clostridium phage CDMH1 complete genome          |
| NC_017174_6_spacer3    | ref NC_024144.1  | 37 | 30 GAA | 7 1, 28, 31, 34, 35, 36, 37  | Clostridium phage CDMH1 complete genome          |
| NC_017174_6_spacer4    | ref NC_024144.1  | 36 | 32 CCA | 4 10, 13, 14, 34             | Clostridium phage CDMH1 complete genome          |
| NC_017174_6_spacer5    | ref NC_024144.1  | 38 | 36 CTG | 2 20, 36                     | Clostridium phage CDMH1 complete genome          |
| NC_017174_6_spacer14   | ref NC_024144.1  | 37 | 37 CCA | 0                            | Clostridium phage CDMH1 complete genome          |
| NC_017174_6_spacer18   | ref NC_024144.1  | 38 | 31 TTT | 7 16, 19, 23, 25, 26, 29, 35 | Clostridium phage CDMH1 complete genome          |
| NC_017174_6_spacer10   | ref NC_007917.1  | 36 | 36 CCA | 0                            | Clostridium phage phi CD119, complete genome     |
| NC_017174_6_spacer12   | ref NC_007917.1  | 37 | 30 CCA | 7 4, 6, 25, 26, 27, 28, 37   | Clostridium phage phi CD119, complete genome     |
| NC_017174_6_spacer19   | ref NC_007917.1  | 35 | 31 CTA | 4 1, 2, 17, 35               | Clostridium phage phi CD119, complete genome     |
| NC_017174_6_spacer22   | ref NC_007917.1  | 37 | 33 CCA | 4 5, 6, 21, 23               | Clostridium phage phi CD119, complete genome     |
| NC_017174_6_spacer2    | ref NC_009231.1  | 35 | 33 CCA | 2 34, 35                     | Clostridium phage phiC2, complete genome         |
| NC_017174_6_spacer4    | ref NC_009231.1  | 36 | 35 CCA | 1                            | 28 Clostridium phage phiC2, complete genome      |
| NC_017174_6_spacer5    | ref NC_009231.1  | 38 | 37 CTG | 1                            | 29 Clostridium phage phiC2, complete genome      |
| NC_017174_6_spacer6    | ref NC_009231.1  | 37 | 37 CCA | 0                            | Clostridium phage phiC2, complete genome         |
| NC_017174_6_spacer17   | ref NC_009231.1  | 37 | 37 CCT | 0                            | Clostridium phage phiC2, complete genome         |
| NC_017174_6_spacer18   | ref NC_009231.1  | 38 | 33 TTT | 5 18, 21, 24, 26, 27         | Clostridium phage phiC2, complete genome         |
| NC_017174_6_spacer32   | ref NC_009231.1  | 37 | 36 CCA | 1                            | 30 Clostridium phage phiC2, complete genome      |
| NC_017174_6_spacer14   | emb LN681535.1   | 37 | 34 CCA | 3                            | 15 Clostridium phage phiCD111, complete genome   |
| NC_017174_6_spacer25   | emb LN681535.1   | 37 | 30 CCA | 7 3, 7, 10, 15, 22, 23, 25   | Clostridium phage phiCD111, complete genome      |
| NC_017174_6_spacer13   | emb LN681534.1   | 37 | 31 CCT | 6 23, 24, 25, 30, 36, 37     | Clostridium phage phiCD24-1, complete genome     |
| NC_017174_6_spacer14   | emb LN681534.1   | 37 | 34 CCA | 3                            | 15 Clostridium phage phiCD24-1, complete genome  |
| NC_017174_6_spacer1    | ref NC_011398.1  | 38 | 36 TCA | 2 5, 20                      | Clostridium phage phiCD27, complete genome       |
| NC_017174_6_spacer6    | ref NC_011398.1  | 37 | 37 CCA | 0                            | Clostridium phage phiCD27, complete genome       |
| NC_017174_6_spacer14   | ref NC_011398.1  | 37 | 36 CCA | 1                            | 32 Clostridium phage phiCD27, complete genome    |
| NC_017174_6_spacer16   | ref NC_011398.1  | 37 | 37 CCT | 0                            | Clostridium phage phiCD27, complete genome       |
| NC_017174_6_spacer18   | ref NC_011398.1  | 38 | 32 TTT | 6 15, 18, 21, 24, 26, 27     | Clostridium phage phiCD27, complete genome       |
| NC_017174_6_spacer18   | emb LN681538.1   | 38 | 31 TTT | 7 1, 2, 17, 20, 23, 25, 26   | Clostridium phage phiCD481-1, complete genome    |
| NC_017174_6_spacer21   | emb LN681538.1   | 37 | 32 TCT | 5 22, 25, 29, 30, 35         | Clostridium phage phiCD481-1, complete genome    |
| NC_017174_6_spacer24   | emb LN681538.1   | 36 | 29 CCT | 7 1, 2, 3, 4, 9, 18, 24      | Clostridium phage phiCD481-1, complete genome    |
| NC_017174_6_spacer27   | emb LN681538.1   | 37 | 37 CCA | 0                            | Clostridium phage phiCD481-1, complete genome    |
| NC_017174_6_spacer29   | emb LN681538.1   | 36 | 35 CCT | 1                            | 30 Clostridium phage phiCD481-1, complete genome |
| NC_017174_7_spacer3    | ref NC_007917.1  | 38 | 38 TGG | 0                            | Clostridium phage phi CD119, complete genome     |
| NC_017174_7_spacer6    | ref NC_007917.1  | 36 | 31 CCA | 5 5, 11, 17, 30, 32          | Clostridium phage phi CD119, complete genome     |
| NC_017174_7_spacer8    | ref NC_007917.1  | 37 | 34 CCA | 3 9, 19, 25                  | Clostridium phage phi CD119, complete genome     |
| NC_017174_7_spacer3    | ref NC_011398.1  | 38 | 38 TGG | 0                            | Clostridium phage phiCD27, complete genome       |
| NC_017174_7_spacer5    | ref NC_011398.1  | 36 | 35 CCA | 1                            | 33 Clostridium phage phiCD27, complete genome    |
| NC_017174_7_spacer2    | ENA CDIE01000001 | 36 | 30 ?   | 6 1, 15, 21, 27, 30, 33      | Clostridium phage phiCD52_contig1                |
| NC_017174_7_spacer3    | ENA CDIE01000001 | 38 | 36 ?   | 2 20, 23                     | Clostridium phage phiCD52_contig1                |
| NC_017174_7_spacer5    | ENA CDIE01000001 | 36 | 34 ?   | 2 5, 9                       | Clostridium phage phiCD52_contig1                |
| NC_017174_7_spacer3    | ref NC_019421.1  | 38 | 38 TGG | 0                            | Clostridium phage phiMMP02, complete genome      |
| NC_017174_7_spacer5    | ref NC_019421.1  | 36 | 35 CCA | 1                            | 33 Clostridium phage phiMMP02, complete genome   |
| NC_017174_8_spacer1    | emb LN681537.1   | 36 | 35 TCA | 1                            | 18 Clostridium phage phiCD211, complete genome   |
| NC_017174_8_spacer2    | emb LN681537.1   | 36 | 34 TCA | 2 13, 14                     | Clostridium phage phiCD211, complete genome      |
| NC_017174_8_spacer6    | emb LN681537.1   | 36 | 36 TCA | 0                            | Clostridium phage phiCD211, complete genome      |
| NC_017174_8_spacer7    | emb LN681537.1   | 36 | 34 TCA | 2 18, 23                     | Clostridium phage phiCD211, complete genome      |
| NC_017174_8_spacer10   | emb LN681537.1   | 36 | 36 TCA | 0                            | Clostridium phage phiCD211, complete genome      |
| NC_017174_8_spacer15   | emb LN681537.1   | 36 | 35 TCA | 1                            | 30 Clostridium phage phiCD211, complete genome   |
| NC_017174_8_spacer16   | emb LN681537.1   | 36 | 36 TCA | 0                            | Clostridium phage phiCD211, complete genome      |
| NC_017174_8_spacer17   | emb LN681537.1   | 36 | 36 TCA | 0                            | Clostridium phage phiCD211, complete genome      |
| NC_017174_8_spacer18   | emb LN681537.1   | 36 | 35 TCA | 1                            | 5 Clostridium phage phiCD211, complete genome    |
| NC_017174_8_spacer23   | emb LN681537.1   | 36 | 35 TTA | 1                            | 15 Clostridium phage phiCD211, complete genome   |
| <b>C.difficile 630</b> |                  |    |        |                              |                                                  |
| NC_009089_8_spacer2    | emb LN681539.1   | 36 | 34 CCA | 2 10, 12                     | Clostridium phage phiCD505, complete genome      |
| NC_009089_8_spacer8    | emb LN681539.1   | 39 | 37 CCA | 2 38, 39                     | Clostridium phage phiCD505, complete genome      |
| NC_009089_9_spacer3    | emb LN681535.1   | 37 | 33 CCT | 4 5, 6, 15, 33               | Clostridium phage phiCD111, complete genome      |
| NC_009089_9_spacer4    | emb LN681535.1   | 36 | 35 TCC | 1                            | 31 Clostridium phage phiCD111, complete genome   |
| NC_009089_9_spacer11   | emb LN681535.1   | 35 | 32 CCA | 3 5, 11, 21                  | Clostridium phage phiCD111, complete genome      |
| NC_009089_9_spacer3    | emb LN681536.1   | 37 | 33 CCT | 4 5, 6, 15, 33               | Clostridium phage phiCD146, complete genome      |
| NC_009089_9_spacer4    | emb LN681536.1   | 36 | 36 TCC | 0                            | Clostridium phage phiCD146, complete genome      |
| NC_009089_9_spacer11   | emb LN681536.1   | 35 | 33 CCA | 2 11, 21                     | Clostridium phage phiCD146, complete genome      |
| NC_009089_9_spacer3    | ref NC_015568.1  | 37 | 33 CCT | 4 5, 6, 15, 33               | Clostridium phage phiCD38-2, complete genome     |

|                       |                 |    |        |                            |                                               |
|-----------------------|-----------------|----|--------|----------------------------|-----------------------------------------------|
| NC_009089_9_spacer4   | ref NC_015568.1 | 36 | 36 TCC | 0                          | Clostridium phage phiCD38-2, complete genome  |
| NC_009089_9_spacer11  | ref NC_015568.1 | 35 | 33 CCA | 2 11, 21                   | Clostridium phage phiCD38-2, complete genome  |
| NC_009089_9_spacer3   | ref NC_019422.1 | 37 | 30 CCT | 7 5, 6, 24, 30, 33, 36, 37 | Clostridium phage phiMMP04, complete genome   |
| NC_009089_9_spacer4   | ref NC_019422.1 | 36 | 29 ACC | 7 1, 2, 3, 9, 13, 25, 31   | Clostridium phage phiMMP04, complete genome   |
| NC_009089_11_spacer1  | ref NC_011398.1 | 37 | 37 CCT | 0                          | Clostridium phage phiCD27, complete genome    |
| NC_009089_11_spacer2  | ref NC_011398.1 | 36 | 36 CCA | 0                          | Clostridium phage phiCD27, complete genome    |
| NC_009089_17_spacer1  | ref NC_011398.1 | 37 | 37 CCT | 0                          | Clostridium phage phiCD27, complete genome    |
| NC_009089_17_spacer4  | ref NC_011398.1 | 37 | 31 CCT | 6 3, 6, 8, 18, 19, 23      | Clostridium phage phiCD27, complete genome    |
| NC_009089_17_spacer15 | ref NC_011398.1 | 36 | 35 CCT | 1                          | 18 Clostridium phage phiCD27, complete genome |
| NC_009089_17_spacer11 | emb LN681537.1  | 36 | 36 CCT | 0                          | Clostridium phage phiCD211, complete genome   |
| NC_009089_17_spacer12 | emb LN681537.1  | 37 | 37 CCA | 0                          | Clostridium phage phiCD27, complete genome    |
| NC_009089_17_spacer2  | ref NC_015262.1 | 37 | 37 CCT | 0                          | Clostridium phage phiCD6356, complete genome  |
| NC_009089_17_spacer4  | ref NC_015262.1 | 37 | 32 CCT | 5 3, 6, 8, 19, 23          | Clostridium phage phiCD6356, complete genome  |
| NC_009089_17_spacer1  | emb LN681539.1  | 37 | 37 CCT | 0                          | Clostridium phage phiCD505, complete genome   |
| NC_009089_17_spacer4  | emb LN681539.1  | 37 | 31 CCT | 6 3, 6, 8, 19, 23, 24      | Clostridium phage phiCD505, complete genome   |

**C.difficile CD196=R20291=2007855=BI1**

|                       |                 |    |        |                          |                                                |
|-----------------------|-----------------|----|--------|--------------------------|------------------------------------------------|
| NC_013315_10_spacer4  | emb LN681536.1  | 39 | 33 CCA | 6 4, 7, 11, 28           | Clostridium phage phiCD146, complete genome    |
| NC_013315_10_spacer5  | emb LN681536.1  | 37 | 36 CCA | 1                        | 33 Clostridium phage phiCD146, complete genome |
| NC_013315_10_spacer4  | ref NC_015568.1 | 39 | 33 CCA | 6 10, 14, 15, 16, 31, 34 | Clostridium phage phiCD38-2, complete genome   |
| NC_013315_10_spacer5  | ref NC_015568.1 | 37 | 35 CCA | 2 24, 31                 | Clostridium phage phiCD38-2, complete genome   |
| NC_013315_10_spacer8  | ref NC_015262.1 | 37 | 37 CCA | 0                        | Clostridium phage phiCD6356, complete genome   |
| NC_013315_10_spacer10 | ref NC_015262.1 | 37 | 32 CCA | 5 1, 2, 3, 4, 7          | Clostridium phage phiCD6356, complete genome   |
| NC_013315_10_spacer3  | ref NC_011398.1 | 35 | 33 CCA | 2 3, 9                   | Clostridium phage phiCD27, complete genome     |
| NC_013315_10_spacer14 | ref NC_011398.1 | 37 | 37 CCT | 0                        | Clostridium phage phiCD27, complete genome     |
| NC_013315_11_spacer3  | emb LN681535.1  | 36 | 32 CCA | 4 3, 7, 9, 12            | Clostridium phage phiCD111, complete genome    |
| NC_013315_11_spacer7  | emb LN681535.1  | 37 | 36 CCC | 1                        | 6 Clostridium phage phiCD111, complete genome  |
| NC_013315_11_spacer3  | ref NC_015568.1 | 36 | 32 CCA | 4 3, 7, 9, 12            | Clostridium phage phiCD38-2, complete genome   |
| NC_013315_11_spacer5  | ref NC_015568.1 | 38 | 37 CCT | 1                        | 8 Clostridium phage phiCD38-2, complete genome |
| NC_013315_11_spacer7  | ref NC_015568.1 | 37 | 37 CCA | 0                        | Clostridium phage phiCD38-2, complete genome   |
| NC_013315_15_spacer3  | ref NC_015262.1 | 38 | 38 CCT | 0                        | Clostridium phage phiCD6356, complete genome   |
| NC_013315_15_spacer9  | ref NC_015262.1 | 36 | 35 CCA | 1                        | 9 Clostridium phage phiCD6356, complete genome |
| NC_013315_19_spacer3  | ref NC_015262.1 | 36 | 34 CCT | 2 6, 8                   | Clostridium phage phiCD6356, complete genome   |
| NC_013315_19_spacer4  | ref NC_015262.1 | 38 | 34 CCA | 4 8, 11, 17, 26          | Clostridium phage phiCD6356, complete genome   |
| NC_013315_19_spacer7  | ref NC_019421.1 | 37 | 37 CCA | 0                        | Clostridium phage phiMMP02, complete genome    |
| NC_013315_19_spacer9  | ref NC_019421.1 | 38 | 33 CCA | 5 12, 15                 | Clostridium phage phiMMP02, complete genome    |
| NC_013315_19_spacer13 | emb LN681537.1  | 37 | 36 CTT | 1                        | 1 Clostridium phage phiCD211, complete genome  |
| NC_013315_19_spacer14 | emb LN681537.1  | 37 | 37 CCT | 0                        | Clostridium phage phiCD211, complete genome    |

**C.difficile BI9**

|                       |                 |    |        |                         |                                                 |
|-----------------------|-----------------|----|--------|-------------------------|-------------------------------------------------|
| NC_013974_10_spacer5  | ref NC_015262.1 | 38 | 37 CCT | 1                       | 38 Clostridium phage phiCD6356, complete genome |
| NC_013974_10_spacer6  | ref NC_015262.1 | 37 | 34 CCA | 3 10, 11, 16            | Clostridium phage phiCD6356, complete genome    |
| NC_013974_12_spacer12 | emb LN681536.1  | 36 | 32 CCA | 4 16, 31, 35, 36        | Clostridium phage phiCD146, complete genome     |
| NC_013974_12_spacer13 | emb LN681536.1  | 37 | 37 CCA | 0                       | Clostridium phage phiCD146, complete genome     |
| NC_013974_12_spacer12 | ref NC_015568.1 | 36 | 32 CCA | 4 16, 31, 35, 36        | Clostridium phage phiCD38-2, complete genome    |
| NC_013974_12_spacer13 | ref NC_015568.1 | 37 | 36 CCA | 1                       | 32 Clostridium phage phiCD38-2, complete genome |
| NC_013974_14_spacer1  | emb LN681536.1  | 38 | 35 CCA | 3 4, 6, 18              | Clostridium phage phiCD146, complete genome     |
| NC_013974_14_spacer7  | emb LN681536.1  | 39 | 34 CCT | 5 1, 2, 16, 27, 30      | Clostridium phage phiCD146, complete genome     |
| NC_013974_18_spacer5  | emb LN681536.1  | 36 | 36 CCA | 0                       | Clostridium phage phiCD146, complete genome     |
| NC_013974_18_spacer7  | emb LN681536.1  | 34 | 32 CCT | 2 3, 9                  | Clostridium phage phiCD146, complete genome     |
| NC_013974_18_spacer10 | emb LN681536.1  | 35 | 28 CCT | 7 1, 2, 3, 4, 5, 15, 22 | Clostridium phage phiCD146, complete genome     |
| NC_013974_18_spacer5  | ref NC_015568.1 | 36 | 33 CCA | 3 14, 15, 16            | Clostridium phage phiCD38-2, complete genome    |
| NC_013974_18_spacer7  | ref NC_015568.1 | 34 | 28 CCT | 6 3, 9, 15, 21, 33, 34  | Clostridium phage phiCD38-2, complete genome    |
| NC_013974_18_spacer10 | ref NC_015568.1 | 35 | 28 CCT | 7 1, 2, 3, 4, 5, 14, 23 | Clostridium phage phiCD38-2, complete genome    |
| NC_013974_18_spacer5  | emb LN681535.1  | 36 | 32 CCC | 4 6, 13, 14, 15         | Clostridium phage phiCD111, complete genome     |
| NC_013974_18_spacer7  | emb LN681535.1  | 34 | 32 CCT | 2 3, 9                  | Clostridium phage phiCD111, complete genome     |
| NC_013974_18_spacer10 | emb LN681535.1  | 35 | 29 CCT | 6 1, 2, 3, 4, 5, 15     | Clostridium phage phiCD111, complete genome     |

**C.difficile CF5**

|                       |                 |    |        |                          |                                                  |
|-----------------------|-----------------|----|--------|--------------------------|--------------------------------------------------|
| NC_017173_6_spacer2   | emb LN681536.1  | 37 | 34 TCT | 3 3, 14, 22              | Clostridium phage phiCD146, complete genome      |
| NC_017173_6_spacer3   | emb LN681536.1  | 38 | 38 CCA | 0                        | Clostridium phage phiCD146, complete genome      |
| NC_017173_6_spacer3   | emb LN681538.1  | 38 | 35 CCA | 3 1, 2, 20               | Clostridium phage phiCD481-1, complete genome    |
| NC_017173_6_spacer7   | emb LN681538.1  | 36 | 30 CCC | 6 12, 13, 15, 24, 27, 28 | Clostridium phage phiCD481-1, complete genome    |
| NC_017173_6_spacer9   | emb LN681538.1  | 36 | 35 CAA | 1                        | 18 Clostridium phage phiCD481-1, complete genome |
| NC_017173_6_spacer3   | emb LN681540.1  | 38 | 38 CCA | 0                        | Clostridium phage phiCD506, complete genome      |
| NC_017173_6_spacer7   | emb LN681540.1  | 36 | 30 CCC | 6 12, 13, 15, 24, 27, 28 | Clostridium phage phiCD506, complete genome      |
| NC_017173_6_spacer9   | emb LN681540.1  | 36 | 35 CAA | 1                        | 18 Clostridium phage phiCD506, complete genome   |
| NC_017173_8_spacer13  | ref NC_015262.1 | 37 | 37 CCT | 0                        | Clostridium phage phiCD6356, complete genome     |
| NC_017173_8_spacer14  | ref NC_015262.1 | 36 | 36 CCA | 0                        | Clostridium phage phiCD6356, complete genome     |
| NC_017173_10_spacer2  | ref NC_015262.1 | 38 | 37 CCA | 1                        | 36 Clostridium phage phiCD6356, complete genome  |
| NC_017173_10_spacer6  | ref NC_015262.1 | 35 | 35 CCG | 0                        | Clostridium phage phiCD6356, complete genome     |
| NC_017173_10_spacer10 | ref NC_015262.1 | 36 | 36 CCA | 0                        | Clostridium phage phiCD6356, complete genome     |
| NC_017173_10_spacer11 | ref NC_015262.1 | 36 | 29 CCT | 7 1, 2, 3, 4, 5, 15, 22  | Clostridium phage phiCD6356, complete genome     |
| NC_017173_10_spacer13 | ref NC_015262.1 | 37 | 36 TCA | 1                        | 8 Clostridium phage phiCD6356, complete genome   |
| NC_017173_10_spacer19 | ref NC_015262.1 | 37 | 37 CCA | 0                        | Clostridium phage phiCD6356, complete genome     |
| NC_017173_10_spacer1  | ref NC_019422.1 | 37 | 31 CTT | 6 4, 8, 14, 16, 21, 24   | Clostridium phage phiMMP04, complete genome      |
| NC_017173_10_spacer2  | ref NC_019422.1 | 38 | 37 CCA | 1                        | 36 Clostridium phage phiMMP04, complete genome   |

**C.difficile M68**

|                      |                |    |        |             |                                             |
|----------------------|----------------|----|--------|-------------|---------------------------------------------|
| NC_017175_6_spacer2  | emb LN681536.1 | 37 | 34 CCT | 3 3, 16, 22 | Clostridium phage phiCD146, complete genome |
| NC_017175_6_spacer3  | emb LN681536.1 | 38 | 38 CCA | 0           | Clostridium phage phiCD146, complete genome |
| NC_017175_10_spacer1 | emb LN681537.1 | 36 | 34 CCT | 2 8, 20     | Clostridium phage phiCD211, complete genome |
| NC_017175_10_spacer2 | emb LN681537.1 | 36 | 36 CCT | 0           | Clostridium phage phiCD211, complete genome |
| NC_017175_10_spacer5 | emb LN681537.1 | 36 | 34 CCA | 2 35, 36    | Clostridium phage phiCD211, complete genome |
