# Supplementary material for: Function of the CRISPR-Cas System of the Human Pathogen Clostridium difficile
Source: PubMed Central journal article supplement — mBio. 2015 Sep 1;6(5):e01112-15. doi: 10.1128/mBio.01112-15 (PMC4556805; doi:10.1128/mbio.01112-15), 2015-09-01
Supplement: mbo004152441st3.pdf [file mbo004152441st3.pdf]

**Table S3. CRISPR spacer homology analysis in comparison with phage sensitivity**

Siphoviridae phages: [phiCD111](#), [phiCD38-2](#), [phiCD146](#), [phiCD24-1](#), [phiCD6356](#)

Myoviridae phages: [phiCD27](#), [phiC2](#), [phiCD119](#), [phiMMP01](#), [phiMMP03](#), [phiCD52](#), [phiCD481-1](#), [phiCD505](#), [phiCD506](#), [phiMMP02](#), [phiMMP04](#), [phiCDMH1](#)

Similar Myoviridae phage groups: [phiCD481-1/phiCD506/phiMMP04](#); [phiMMP02/phiCD505](#); [phiMMP01/phiMMP03](#)

**Analysis of spacer targets**

|                                                                         | Phage homology                                      | Target gene product                                                  | PAM(CCA/T consensus) |
|-------------------------------------------------------------------------|-----------------------------------------------------|----------------------------------------------------------------------|----------------------|
| <b>CRISPR spacers of strain 630</b>                                     |                                                     |                                                                      |                      |
| <b>CRISPR 3 4 (6+3 spacers)</b>                                         |                                                     |                                                                      |                      |
| CRISPR3 spacer 2                                                        | <a href="#">phiCD211</a>                            | conserved protein of unknown function                                | CCT                  |
| CRISPR3 spacer 5 (4 mismatches, <b>1 in seed insertion position 3</b> ) | <a href="#">phiCD111</a>                            | tail protein/endopeptidase                                           | CTT                  |
| <b>CRISPR4 spacer 1 (6 mismatches, 3 in seed position 2,5,6)</b>        |                                                     |                                                                      |                      |
|                                                                         | <a href="#">phiCD119</a>                            | xkdK   xkdK protein                                                  | CCA                  |
| <b>CRISPR4 spacer 2 (3 mismatches, 1 in seed position 5)</b>            | <a href="#">phiCD505</a>                            | conserved protein of unknown function (right end-skin element, yqzN) | CCT                  |
| <b>CRISPR4 spacer 2 (2 mismatches, no in seed)</b>                      | <a href="#">phiMMP02</a>                            | conserved protein of unknown function (right end-skin element, yqzN) | CCT                  |
| <b>CRISPR4 spacer 2 (2 mismatches, no in seed)</b>                      | <a href="#">phiCD27</a>                             | hypothetical protein                                                 | CCT                  |
| <b>CRISPR4 spacer 3 (1 mismatch, no in seed)</b>                        | <a href="#">phiC2</a>                               | putative tail tape measure protein                                   | CCA                  |
| <b>CRISPR4 spacer 3 (1 mismatch, no in seed)</b>                        | <a href="#">phiMMP01</a>                            | putative tail tape measure protein                                   | CCA                  |
| <b>CRISPR4 spacer 3 (1 mismatch, no in seed)</b>                        | <a href="#">phiMMP03</a>                            | putative tail tape measure protein                                   | CCA                  |
| <b>CRISPR4 spacer 3 (1 mismatch, no in seed)</b>                        | <a href="#">phiCDMH1</a>                            | putative tail tape measure protein                                   | CCA                  |
| <b>CRISPR 6 (13 spacers)</b>                                            |                                                     |                                                                      |                      |
| CRISPR6 spacer 1(6 mismatches, <b>3 in seed positions 4,7,8</b> )       | <a href="#">phiCD111</a>                            | conserved protein of unknown function                                | CTA                  |
| <b>CRISPR6 spacer 8 (1 mismatch in seed position 1)</b>                 | <a href="#">phiCD481-1</a>                          | Intergenic region                                                    | CGA                  |
| <b>CRISPR6 spacer 8 (3 mismatches, no in seed)</b>                      | <a href="#">phiCD111</a>                            | Intergenic region                                                    | CCA                  |
| <b>CRISPR6 spacer 8 (1 mismatch, no in seed)</b>                        | <a href="#">phiCD506</a>                            | Intergenic region                                                    | CCA                  |
| <b>CRISPR6 spacer 8</b>                                                 | <a href="#">phiCD146</a>                            | Intergenic region                                                    | CCA                  |
| <b>CRISPR6 spacer 8</b>                                                 | <a href="#">phiCD38-2</a>                           | Intergenic region                                                    | CCA                  |
| CRISPR6 spacer 13 (3 mismatches, <b>2 in seed positions 2 and 3</b> )   | <a href="#">phiCD119</a>                            | int   putative integrase                                             | CCA                  |
| <b>CRISPR 7 (12 spacers)</b>                                            |                                                     |                                                                      |                      |
| CRISPR7 spacer 3                                                        | C. difficile B11 putative phage or plasmid sequence |                                                                      | CCA                  |
| <b>CRISPR7 spacer 6 (3 mismatches, no in seed)</b>                      | <a href="#">phiCD481-1</a>                          | Site-specific recombinase, phage integrase family                    | TCG                  |
| <b>CRISPR7 spacer 6 (3 mismatches, no in seed)</b>                      | <a href="#">phiCD506</a>                            | Site-specific recombinase, phage integrase family                    | CCG                  |
| <b>CRISPR7 spacer 6 (4 mismatches, 1 in seed position 3)</b>            | <a href="#">phiMMP04</a>                            | Site-specific recombinase, phage integrase family                    | CCG                  |
| CRISPR7 spacer 11 ( <b>8 mismatches, 2 in seed position 3,5</b> )       | <a href="#">phiCD119</a>                            | hypothetical protein                                                 | CCT                  |
| <b>CRISPR 8 (8 spacers)</b>                                             |                                                     |                                                                      |                      |
| <b>CRISPR8 spacer 2</b>                                                 | <a href="#">phiCD119</a>                            | hypothetical protein                                                 | ACA                  |
| <b>CRISPR8 spacer 2 (2 mismatches, no in seed)</b>                      | <a href="#">phiC2</a>                               | putative cytosine-C5 specific DNA methylase                          | ACA                  |
| <b>CRISPR8 spacer 2</b>                                                 | <a href="#">phiMMP03</a>                            | putative phage DNA modification methylase                            | ACA                  |
| <b>CRISPR8 spacer 2</b>                                                 | <a href="#">phiMMP02</a>                            | putative phage DNA modification methylase                            | ACA                  |
| <b>CRISPR8 spacer 2 (2 mismatches, no in seed)</b>                      | <a href="#">phiCD505</a>                            | putative phage DNA modification methylase                            | CCA                  |
| <b>CRISPR8 spacer 2</b>                                                 | <a href="#">phiCDMH1</a>                            | putative DNA methylase protein                                       | CTA                  |
| <b>CRISPR8 spacer 4</b>                                                 | <a href="#">phiCD38-2</a>                           | hypothetical protein                                                 | CCA                  |
| <b>CRISPR8 spacer 4 (1 mismatch, no in seed)</b>                        | <a href="#">phiCD146</a>                            | conserved protein of unknown function                                | CCA                  |
| <b>CRISPR8 spacer 4 (3 mismatches, no in seed)</b>                      | <a href="#">phiCD111</a>                            | conserved protein of unknown function                                | CCA                  |
| <b>CRISPR8 spacer 8 (2 mismatches, 1 in seed position 6)</b>            | <a href="#">phiCD27</a>                             | putative phage tail tape measure protein                             | CCA                  |
| <b>CRISPR8 spacer 8 (1 mismatch, no in seed)</b>                        | <a href="#">phiCD505</a>                            | putative phage tail tape measure protein                             | CCA                  |
| <b>CRISPR 9 (15 spacers)</b>                                            |                                                     |                                                                      |                      |
| <b>CRISPR9 spacer 1</b>                                                 | <a href="#">phiCD27</a>                             | putative portal protein                                              | CCA                  |
| <b>CRISPR9 spacer 1</b>                                                 | <a href="#">phiCD505</a>                            | putative portal protein                                              | CCA                  |
| <b>CRISPR9 spacer 1</b>                                                 | <a href="#">phiMMP02</a>                            | putative portal protein                                              | CCA                  |
| CRISPR9 spacer 2                                                        | <a href="#">phiCD6356</a>                           | putative tail fiber protein H                                        | CCA                  |
| <b>CRISPR9 spacer 3 (4 mismatches, 2 in seed positions 5 and 6)</b>     | <a href="#">phiCD38-2</a>                           | putative DNase/helicase protein                                      | CCT                  |
| <b>CRISPR9 spacer 3 (4 mismatches, 2 in seed positions 5 and 6)</b>     | <a href="#">phiCD111</a>                            | putative DNase/helicase protein                                      | CCT                  |
| <b>CRISPR9 spacer 3 (4 mismatches, 2 in seed positions 5 and 6)</b>     | <a href="#">phiCD146</a>                            | putative DNase/helicase protein                                      | CCT                  |
| <b>CRISPR9 spacer 3 (4 mismatches, 2 in seed positions 5 and 6)</b>     | <a href="#">phiCD506</a>                            | putative DNase/helicase protein                                      | CCT                  |
| <b>CRISPR9 spacer 3 (6 mismatches, 2 in seed positions 5 and 6)</b>     | <a href="#">phiMMP04</a>                            | putative DNase/helicase protein                                      | CCT                  |
| <b>CRISPR9 spacer 3 (6 mismatches, 3 in seed positions 5,7 and 8)</b>   | <a href="#">phiCD481-1</a>                          | putative DNase/helicase protein                                      | CCT                  |

|                                                                       |                   |                                                                           |  |            |
|-----------------------------------------------------------------------|-------------------|---------------------------------------------------------------------------|--|------------|
| <b>CRISPR9 spacer 4</b>                                               |                   |                                                                           |  |            |
| <b>CRISPR9 spacer 4</b> (1 mismatch in seed position 6)               | <b>phiCD38-2</b>  | putative DNase/helicase protein                                           |  | <b>TCC</b> |
| <b>CRISPR9 spacer 4</b>                                               | <b>phiCD111</b>   | putative DNase/helicase protein                                           |  | <b>TCC</b> |
| <b>CRISPR9 spacer 4</b>                                               | <b>phiCD146</b>   | putative DNase/helicase protein                                           |  | <b>TCC</b> |
| <b>CRISPR9 spacer 4</b> (6 mismatches, 2 in seed position 1,3)        | <b>phiMMP04</b>   | putative DNase/helicase protein                                           |  | <b>ACC</b> |
| <b>CRISPR9 spacer 4</b> (8 mismatches, 3 in seed position 1,3,7)      | <b>phiCD481-1</b> | putative DNase/helicase protein                                           |  | <b>ACC</b> |
| <b>CRISPR9 spacer 4</b> (8 mismatches, 3 in seed position 1,3,7)      | <b>phiCD506</b>   | putative DNase/helicase protein                                           |  | <b>ACC</b> |
| CRISPR9 spacer 6                                                      | pCDB1             | hypothetical protein                                                      |  | CCA        |
| CRISPR9 spacer 8 (8 mismatches, 3 in seed, position 1,3,6)            | phiCD119          | int   putative integrase                                                  |  | <b>AGA</b> |
| <b>CRISPR9 spacer 11</b> (2 mismatches, no in seed)                   | <b>phiCD38-2</b>  | hypothetical protein                                                      |  | CCA        |
| <b>CRISPR9 spacer 11</b> (2 mismatches, no in seed)                   | <b>phiCD146</b>   | conserved protein of unknown function                                     |  | CCA        |
| <b>CRISPR9 spacer 11</b> (3 mismatches, no in seed)                   | <b>phiCD111</b>   | conserved protein of unknown function                                     |  | CCA        |
| <b>CRISPR 10 (2 spacers)</b>                                          |                   |                                                                           |  |            |
| <b>CRISPR10 spacer 2</b> (2 mismatches, 1 in seed position 5)         | <b>phiCD146</b>   | Minor capsid protein                                                      |  | CTA        |
| <b>CRISPR10 spacer 2</b> (2 mismatches, 1 in seed position 5)         | <b>phiCD111</b>   | Minor capsid protein                                                      |  | CTA        |
| <b>CRISPR10 spacer 2</b> (8 mismatches, 1 in seed position 8)         | <b>phiCD38-2</b>  | Minor capsid protein                                                      |  | CAA        |
| <b>CRISPR 11 (14 spacers)</b>                                         |                   |                                                                           |  |            |
| <b>CRISPR11 spacer 1</b>                                              | phiCD27           | hypothetical protein                                                      |  | CCT        |
| <b>CRISPR11 spacer 1</b>                                              | <b>phiCD505</b>   | conserved protein of unknown function (left hand-head morphogenesis prote |  | CCT        |
| <b>CRISPR11 spacer 1</b>                                              | <b>phiMMP02</b>   | conserved protein of unknown function (left hand-head morphogenesis prote |  | CCT        |
| CRISPR11 spacer 2                                                     | phiCD27           | putative phage tail tape measure protein                                  |  | CCA        |
| CRISPR11 spacer 4 (6 mismatches, 4 in seed positions 3, 5, 7, 8)      | phiCD119          | hypothetical protein                                                      |  | CCA        |
| <b>CRISPR11 spacer 10</b> (3 mismatches, 1 in seed position 3)        | <b>phiCD146</b>   | Tail tape measure                                                         |  | CCA        |
| <b>CRISPR11 spacer 10</b> (4 mismatches, 1 in seed position 3)        | <b>phiCD38-2</b>  | Tail tape measure                                                         |  | CCA        |
| <b>CRISPR 12 (6 spacers)</b>                                          |                   |                                                                           |  |            |
| <b>CRISPR12 spacer 6</b> (5 mismatches, 2 in seed position 1,2)       | <b>phiCD146</b>   | Terminase large subunit                                                   |  | CCT        |
| <b>CRISPR12 spacer 6</b> (8 mismatches, 3 in seed position 1,2,8)     | <b>phiCD38-2</b>  | Terminase large subunit                                                   |  | CCT        |
| <b>CRISPR12 spacer 6</b> (10 mismatches, 3 in seed position 1,2,8)    | <b>phiCD111</b>   | Terminase large subunit                                                   |  | CCT        |
| <b>CRISPR 15 16 (3+6 spacers)</b>                                     |                   |                                                                           |  |            |
| CRISPR15 spacer 1 (6 mismatches, 3 in seed position 2, 5, 6)          | phiCD119          | xkdK   XkdK protein                                                       |  | CCA        |
| <b>CRISPR15 spacer 2</b> (2 mismatches, no in seed)                   | phiCD27           | hypothetical protein                                                      |  | CCT        |
| <b>CRISPR15 spacer 2</b> (5 mismatches, 1 in seed position 5)         | <b>phiCD505</b>   | conserved protein of unknown function (right end-skin element, yqzN)      |  | CCT        |
| <b>CRISPR15 spacer 2</b> (2 mismatches, no in seed)                   | <b>phiMMP02</b>   | conserved protein of unknown function (right end-skin element, yqzN)      |  | CCT        |
| <b>CRISPR15 spacer 3</b> (1 mismatch, no in seed)                     | phiC2             | putative tail tape measure protein                                        |  | CCA        |
| <b>CRISPR15 spacer 3</b> (1 mismatch, no in seed)                     | <b>phiMMP01</b>   | putative tail tape measure protein                                        |  | CCA        |
| <b>CRISPR15 spacer 3</b> (1 mismatch, no in seed)                     | <b>phiMMP03</b>   | putative tail tape measure protein                                        |  | CCA        |
| <b>CRISPR15 spacer 3</b> (1 mismatch, no in seed)                     | phiCDMH1          | putative tail tape measure protein                                        |  | CCA        |
| CRISPR16 spacer 2                                                     | phiCD211          | conserved protein of unknown function                                     |  | CCT        |
| CRISPR16 spacer 5 (4 mismatches, 1 in seed position 3)                | phiCD111          | tail protein/endopeptidase                                                |  | <b>CTT</b> |
| <b>CRISPR 17 (19 spacers)</b>                                         |                   |                                                                           |  |            |
| <b>CRISPR17 spacer 1</b>                                              | phiCD27           | hypothetical protein                                                      |  | CCT        |
| <b>CRISPR17 spacer 1</b>                                              | <b>phiCD505</b>   | conserved protein of unknown function (right hand-head morphogenesis prot |  | CCT        |
| <b>CRISPR17 spacer 1</b>                                              | <b>phiMMP02</b>   | conserved protein of unknown function (right hand-head morphogenesis prot |  | CCT        |
| CRISPR17 spacer 2                                                     | phiCD6356         | putative phage tail tape measure protein                                  |  | CCT        |
| CRISPR17 spacer 3 (7 mismatches, 3 in seed position 4,7,8)            | phiCD6356         | hypothetical protein                                                      |  | CCA        |
| <b>CRISPR17 spacer 4</b> (5 mismatches, 3 in seed position 3,6,8)     | phiCD6356         | hypothetical protein                                                      |  | CCT        |
| <b>CRISPR17 spacer 4</b> (9 mismatches, 5 in seed position 1,2,3,6,8) | <b>phiMMP02</b>   | conserved protein of unknown function                                     |  | CCT        |
| <b>CRISPR17 spacer 4</b> (6 mismatches, 3 in seed position 3,6,8)     | phiCD27           | hypothetical protein                                                      |  | CCT        |
| <b>CRISPR17 spacer 4</b> (6 mismatches, 3 in seed position 3,6,8)     | <b>phiCD505</b>   | conserved protein of unknown function                                     |  | CCT        |
| <b>CRISPR17 spacer 4</b> (7 mismatches, 4 in seed position 1,3,6,8)   | phiCD506          | conserved protein of unknown function                                     |  | <b>TCT</b> |
| <b>CRISPR17 spacer 4</b> (6 mismatches, 3 in seed position 1,3,6,8)   | <b>phiMMP03</b>   | conserved protein of unknown function                                     |  | CCT        |
| CRISPR17 spacer 11                                                    | phiCD211          | conserved protein of unknown function                                     |  | CCT        |
| CRISPR17 spacer 12                                                    | phiCD211          | protein of unknown function                                               |  | CCA        |
| <b>CRISPR17 spacer 15</b>                                             | <b>phiMMP01</b>   | conserved protein of unknown function                                     |  | CCT        |
| <b>CRISPR17 spacer 15</b> (1 mismatch, no in seed)                    | phiCD27           | hypothetical protein                                                      |  | CCT        |

---

**CRISPR spacers of R20291 strain****CRISPR10 (14 spacers)**

|                                                                                                  |                   |                                                   |            |
|--------------------------------------------------------------------------------------------------|-------------------|---------------------------------------------------|------------|
| <b>CRISPR10 spacer 1</b> (8 mismatches, <b>position 3,4,5,6 in seed</b> , 10,14,21,33)           | <b>phiMMP04</b>   | putative phage terminase, large subunit           | CCT        |
| <b>CRISPR10 spacer 1</b> (6 mismatches, <b>position 3,4,5,6 in seed</b> , 10,33)                 | <b>phiCD506</b>   | putative phage terminase, large subunit           | CCT        |
| <b>CRISPR10 spacer 1</b> (6 mismatches, <b>position 3,4,5,6 in seed</b> , 10,33)                 | <b>phiCD481-1</b> | putative phage terminase, large subunit           | CCT        |
| CRISPR10 spacer 3 (2 mismatches, <b>position 2 in seed</b> , 9)                                  | phiCD27           | hypothetical protein                              | CCA        |
| <b>CRISPR10 spacer 4</b> (6 mismatches, position 10,14,15,16,31,34)                              | <b>phiCD38-2</b>  | endolysine                                        | CCA        |
| <b>CRISPR10 spacer 4</b> (4 mismatches, <b>position 4,7 in seed</b> , 11, 28)                    | <b>phiCD111</b>   | endolysine                                        | CCA        |
| <b>CRISPR10 spacer 4</b> (6 mismatches, position 10,14,15,16,31,34)                              | <b>phiCD146</b>   | endolysine                                        | CCA        |
| <b>CRISPR10 spacer 4</b> (9 mismatches, <b>position 1,4,7,8 in seed</b> , 10,14,15,16,34,37)     | phiCD6356         | probable phage N-acetylmuramoyl-L-alanine amidase | <b>TAA</b> |
| <b>CRISPR10 spacer 5</b> (2 mismatches in positions 24, 33, no in seed)                          | <b>phiCD38-2</b>  | hypothetical protein                              | CCA        |
| <b>CRISPR10 spacer 5</b> (1 mismatch in position 33, no in seed)                                 | <b>phiCD146</b>   | conserved protein of unknown function             | CCA        |
| <b>CRISPR10 spacer 7</b> (9 mismatches, <b>position 1,3,4,8 in seed</b> , 9,10,12,13,35)         | <b>phiCD38-2</b>  | Intergenic region                                 | <b>AGT</b> |
| <b>CRISPR10 spacer 7</b> (12 mismatches, <b>position 1,3,4,5,6,7 in seed</b> , 9,10,11,12,13,14) | <b>phiCD111</b>   | Intergenic region                                 | <b>TCA</b> |
| <b>CRISPR10 spacer 7</b> (6 mismatches, <b>position 1,3,4,8 in seed</b> , 9,35)                  | <b>phiCD146</b>   | Intergenic region                                 | <b>AGT</b> |
| CRISPR10 spacer 8                                                                                | phiCD6356         | hypothetical protein                              | CCA        |
| <b>CRISPR10 spacer 9</b> (8 mismatches, <b>position 2,6,7,8 in seed</b> , 9,12,15,36)            | <b>phiCD38-2</b>  | recombinase/resolvase                             | CCT        |
| <b>CRISPR10 spacer 9</b> (8 mismatches, <b>position 2,6,7,8 in seed</b> , 9,12,15,36)            | <b>phiCD111</b>   | recombinase/resolvase                             | CCT        |
| CRISPR10 spacer 10 (3 mismatches, <b>positions 3,4,7 in seed</b> )                               | phiCD6356         | putative terminase large subunit                  | CCA        |
| CRISPR10 spacer 13 (7 mismatches, <b>position 4,6,7 in seed</b> , 16,17,18,28)                   | phiCD119          | putative portal protein                           | CCA        |
| <b>CRISPR10 spacer 14</b>                                                                        | phiCD27           | putative antirepressor                            | CCT        |
| <b>CRISPR10 spacer 14</b>                                                                        | phiCD52           | conserved protein of unknown function             | CCT        |
| <b>CRISPR10 spacer 14</b>                                                                        | <b>phiCD505</b>   | putative antirepressor                            | CCT        |
| <b>CRISPR10 spacer 14</b> (1 mismatch position 27, no in seed)                                   | phiC2             | hypothetical protein                              | CCT        |
| <b>CRISPR10 spacer 14</b> (1 mismatch, no in seed)                                               | phiMMP03          | conserved protein of unknown function             | CCT        |

**CRISPR11 (11 spacers)**

|                                                                                |                   |                                 |     |
|--------------------------------------------------------------------------------|-------------------|---------------------------------|-----|
| <b>CRISPR11 spacer 3</b> (4 mismatches, <b>position 3, 7 in seed</b> , 9, 12)  | <b>phiCD38-2</b>  | putative DNase/helicase protein | CCA |
| <b>CRISPR11 spacer 3</b> (4 mismatches, <b>position 2,3 in seed</b> , 12, 21)  | <b>phiMMP04</b>   | putative DNase/helicase protein | CCA |
| <b>CRISPR11 spacer 3</b> (2 mismatches, <b>position 7 in seed</b> , 12)        | <b>phiCD506</b>   | putative DNase/helicase protein | CCA |
| <b>CRISPR11 spacer 3</b> (3 mismatches, <b>position 3,7 in seed</b> , 12)      | <b>phiCD481-1</b> | putative DNase/helicase protein | CCA |
| <b>CRISPR11 spacer 3</b> (3 mismatches, <b>position 3,7 in seed</b> , 12)      | <b>phiCD111</b>   | putative DNase/helicase protein | CCA |
| <b>CRISPR11 spacer 3</b> (3 mismatches, <b>position 3,7 in seed</b> , 12)      | <b>phiCD146</b>   | putative DNase/helicase protein | CCA |
| CRISPR11 spacer 5 (1 mismatch <b>seed in position 8</b> )                      | <b>phiCD38-2</b>  | hypothetical protein            | CCT |
| <b>CRISPR11 spacer 7</b>                                                       | <b>phiCD38-2</b>  | minor capsid protein            | CCA |
| <b>CRISPR11 spacer 7</b> (1 mismatch in seed position 6)                       | <b>phiCD111</b>   | minor capsid protein            | CCC |
| <b>CRISPR11 spacer 7</b> (3 mismatches 13-15, no in seed)                      | <b>phiCD146</b>   | minor capsid protein            | CCA |
| CRISPR11 spacer 10 (7 mismatches, <b>position 3,6 in seed</b> , 9,15,30,32,37) | pCDB11            | hypothetical protein            | CTT |

**CRISPR12 (4 spacers)**

|                                                                                 |           |                   |     |
|---------------------------------------------------------------------------------|-----------|-------------------|-----|
| CRISPR12 spacer 1 (8 mismatches, <b>position 1,3,4,5 in seed</b> , 13,19,21,36) | phiCD6356 | ParA-like protein | CCG |
|---------------------------------------------------------------------------------|-----------|-------------------|-----|

**CRISPR13 (5 spacers)**

|                                                                          |          |              |     |
|--------------------------------------------------------------------------|----------|--------------|-----|
| CRISPR13 spacer 4 (5 mismatches, <b>position 2,6 in seed</b> , 15,30,36) | phiCD119 | XkdK protein | CCT |
|--------------------------------------------------------------------------|----------|--------------|-----|

**CRISPR15 (14 spacers)**

|                                                                                 |                          |                                    |            |
|---------------------------------------------------------------------------------|--------------------------|------------------------------------|------------|
| <b>CRISPR15 spacer 2</b> (5 mismatches, <b>position 4,7 in seed</b> , 10,13,16) | <b>phiCD38-2</b>         | minor capsid protein               | <b>AAA</b> |
| <b>CRISPR15 spacer 2</b> (3 mismatches, <b>position 7 in seed</b> , 13,31)      | <b>phiCD111</b>          | minor capsid protein               | CCT        |
| <b>CRISPR15 spacer 2</b> (4 mismatches, position 10,31,33,34)                   | <b>phiCD146</b>          | minor capsid protein               | CTT        |
| CRISPR15 spacer 3                                                               | phiCD6356                | putative major capsid protein A    | CCT        |
| CRISPR15 spacer 7 (5 mismatches, <b>position 5 in seed</b> , 11,25,31,33)       | phiCD27                  | hypothetical protein               | CCA        |
| <b>CRISPR15 spacer 9</b> (1 mismatch in position 9, no in seed)                 | PhiCD6356                | putative site-specific recombinase | CCA        |
| <b>CRISPR15 spacer 9</b> (5 mismatches, <b>position 3,6 in seed</b> , 27,29,36) | Streptococcus phage PH10 | integrase/recombinases subgroup 3  | CCG        |
| <b>CRISPR15 spacer 10</b>                                                       | <b>phiMMP04</b>          | Intergenic region                  | CCG        |
| <b>CRISPR15 spacer 10</b>                                                       | <b>phiCD481-1</b>        | Intergenic region                  | CCG        |
| <b>CRISPR15 spacer 10</b>                                                       | <b>phiCD506</b>          | Intergenic region                  | CCG        |
| <b>CRISPR15 spacer 10</b> (2 mismatches in position 26, 37, no in seed)         | pCD630                   |                                    | CCG        |

|                                                                                           |                                           |                                                             |     |
|-------------------------------------------------------------------------------------------|-------------------------------------------|-------------------------------------------------------------|-----|
| <b>CRISPR16 (9 spacers)</b>                                                               |                                           |                                                             |     |
| <b>CRISPR16 spacer 4</b> (4 mismatches, <b>position 8 in seed</b> , 26,29,34)             | <b>phiMMP04</b>                           | Phage portal protein                                        | CAA |
| <b>CRISPR16 spacer 4</b> (6 mismatches, <b>position 2,8 in seed</b> , 11,26,29,34)        | <b>phiCD481-1</b>                         | Phage portal protein                                        | CAA |
| <b>CRISPR16 spacer 4</b> (6 mismatches, <b>position 2,8 in seed</b> , 11,26,29,34)        | <b>phiCD506</b>                           | Phage portal protein                                        | CAA |
| <b>CRISPR16 spacer 5</b> (1 mismatch <b>position 23</b> , no in seed)                     | <b>phiMMP02</b>                           | conserved protein of unknown function                       | CCA |
| <b>CRISPR16 spacer 5</b> (1 mismatch <b>position 23</b> , no in seed)                     | <b>phiCD505</b>                           | conserved protein of unknown function                       | CCA |
| <b>CRISPR16 spacer 5</b> (2 mismatches <b>position 23,31</b> , no in seed)                | phiCD27                                   | hypothetical protein                                        | CCA |
| <b>CRISPR16 spacer 6</b>                                                                  | <b>phiCD38-2</b>                          | terminase large subunit                                     | CCA |
| <b>CRISPR16 spacer 6</b> (2 mismatches, <b>2 in seed position 4,5</b> )                   | <b>phiCD111</b>                           | terminase large subunit                                     | CCA |
| <b>CRISPR16 spacer 6</b> (2 mismatches, <b>2 in seed position 4,5</b> )                   | <b>phiCD146</b>                           | terminase large subunit                                     | CCA |
| <b>CRISPR16 spacer 9</b> (6 mismatches, <b>position 13,15,18,19,31,37</b> )               | Bacillus thuringiensis phage GIL16c       | hypothetical protein                                        | CCA |
| <b>CRISPR16 spacer 9</b> (7 mismatches, <b>position 3,7 in seed</b> , 10,16,18,19,37)     | Bacillus thuringiensis phage Bam35c       | putative protein 14                                         | CCA |
| <b>CRISPR16 spacer 9</b> (7 mismatches, <b>position 3,7 in seed</b> , 10,16,18,19,37)     | Bacillus thuringiensis HD-789 plasmid p04 | putative cytoplasmic protein                                | CCA |
| <b>CRISPR16 spacer 9</b> (7 mismatches, <b>position 3,7 in seed</b> , 10,16,18,19,37)     | Bacillus phage pGIL01                     | putative DNA-packaging protein                              | CCA |
| <b>CRISPR19 (26 spacers)</b>                                                              |                                           |                                                             |     |
| CRISPR19 spacer 1                                                                         | pCDBI1                                    | hypothetical protein                                        | CCA |
| CRISPR19 spacer 2                                                                         | pCDBI1                                    |                                                             | CCT |
| CRISPR19 spacer 6 (2 mismatches in seed position 6,8)                                     | phiCD6356                                 | putative phage tail tape measure protein                    | CCT |
| CRISPR19 spacer 7 (4 mismatches, <b>position 8 in seed</b> , 11, 17, 26)                  | phiCD6356                                 | putative phage tail protein                                 | CCA |
| CRISPR19 spacer 9 (10 mismatches, <b>position 3,4,5,6 in seed</b> , 15,35,37,39,40,41)    | phiCD6356                                 | putative phage tail tape measure protein                    | CCA |
| CRISPR19 spacer 10                                                                        | <b>phiMMP02</b>                           | putative phage protein                                      | CCA |
| <b>CRISPR19 spacer 12</b> (3 mismatches, position 12,15,36, no in seed)                   | phiC2                                     | Gp157-like protein                                          | CCA |
| <b>CRISPR19 spacer 12</b> (3 mismatches, position 12,15,36, no in seed)                   | PhiCD52                                   | putative phage protein involved in bacteriophage resistance | CCA |
| <b>CRISPR19 spacer 12</b> (4 mismatches, position 12,15,36,37, no in seed)                | <b>phiMMP02</b>                           | conserved protein of unknown function                       | TCA |
| <b>CRISPR19 spacer 12</b> (3 mismatches, position 12,15,36, no in seed)                   | phiCD119                                  | hypothetical protein                                        | CCA |
| <b>CRISPR19 spacer 12</b> (3 mismatches, position 12,15,36, no in seed)                   | <b>phiCD24-2</b>                          | conserved protein of unknown function                       | CCA |
| <b>CRISPR19 spacer 12</b> (3 mismatches, position 12,15,36, no in seed)                   | <b>phiCD505</b>                           | conserved protein of unknown function                       | CCA |
| <b>CRISPR19 spacer 12</b> (3 mismatches, position 12,15,36, no in seed)                   | <b>phiMMP01</b>                           | conserved protein of unknown function                       | CCA |
| <b>CRISPR19 spacer 12</b> (3 mismatches, position 12,15,36, no in seed)                   | <b>phiMMP03</b>                           | conserved protein of unknown function                       | CCA |
| <b>CRISPR19 spacer 12</b> (8 mismatches, <b>position 3,5 in seed</b> , 12,15,18,24,27,36) | phiCD27                                   | hypothetical protein                                        | CCA |
| <b>CRISPR19 spacer 12</b> (3 mismatches, position 12,15,36, no in seed)                   | phiCDMH1                                  | conserved hypothetical protein (Gp157-like)                 | CCA |
| CRISPR19 spacer 16 (1 mismatch in seed position 1)                                        | phiCD211                                  | protein of unknown function                                 | CTT |
| CRISPR19 spacer 17                                                                        | phiCD211                                  | protein of unknown function                                 | GCT |
| <b>CRISPR19 spacer 23</b> (6 mismatches, <b>position 3 in seed</b> , 9,15,18,24,25)       | <b>phiCD38-2</b>                          | Minor capsid protein                                        | CCA |
| <b>CRISPR19 spacer 23</b> (5 mismatches, <b>position 3 in seed</b> , 9,23,24,25)          | <b>phiCD111</b>                           | Minor capsid protein                                        | CCA |
| <b>CRISPR19 spacer 23</b> (6 mismatches, <b>position 1,3 in seed</b> , 9,18,24,25)        | <b>phiCD146</b>                           | Minor capsid protein                                        | CCA |
| <b>CRISPR20 (9 spacers)</b>                                                               |                                           |                                                             |     |
| <b>CRISPR20 spacer 3</b> (7 mismatches, position 6 in seed, 18,19,21,29,31,33)            | <b>phiMMP02</b>                           | putative phage protein                                      | CCA |
| <b>CRISPR20 spacer 3</b> (7 mismatches, position 6 in seed, 18,19,21,29,31,33)            | phiC2                                     | hypothetical protein                                        | CCA |
| <b>CRISPR20 spacer 3</b> (7 mismatches, position 6 in seed, 18,19,21,29,31,33)            | phiCD119                                  | protein of unknown function                                 | CCA |
| CRISPR20 spacer 5 (2 mismatches, position 18,33, no in seed)                              | phiCD6356                                 | putative phage tail tape measure protein                    | CCT |
| <b>CRISPR20 spacer 7</b> (4 mismatches, <b>position 1, 6 in seed</b> ; pos 33, 36)        | <b>phiMMP04</b>                           | conserved protein of unknown function                       | CCA |
| <b>CRISPR20 spacer 7</b> (6 mismatches, <b>position 1,3, 6 in seed</b> ; pos 22, 33, 36)  | <b>phiCD481-1</b>                         | conserved protein of unknown function                       | CCA |
| <b>CRISPR20 spacer 7</b> (6 mismatches, <b>position 1,3, 6 in seed</b> ; pos 22, 33, 36)  | <b>phiCD506</b>                           | conserved protein of unknown function                       | CCA |

#### Analysis by phage targeting

| Phage (total of 19) and plasmids | Strain | CRISPR spacer                                              | PAM(CCA/T consensus) | Expected phage sensitivity | Experimental phage sensitivity |
|----------------------------------|--------|------------------------------------------------------------|----------------------|----------------------------|--------------------------------|
| phiCD27                          | 630    | CRISPR4 spacer 2 (2 mismatches, seed OK)                   | cct                  | Expected resistant         | Resistant                      |
|                                  |        | CRISPR8 spacer 8 (2 mismatches, 1 in seed position 6)      | cca                  |                            |                                |
|                                  |        | CRISPR9 spacer 1                                           | cca                  |                            |                                |
|                                  |        | CRISPR11 spacer 1                                          | cct                  |                            |                                |
|                                  |        | CRISPR11 spacer 2                                          | cca                  |                            |                                |
|                                  |        | CRISPR15 spacer 2 (2 mismatches, no in seed)               | cct                  |                            |                                |
|                                  |        | CRISPR17 spacer 1                                          | cct                  |                            |                                |
|                                  |        | CRISPR17 spacer 15 (1 mismatch, no in seed)                | cct                  |                            |                                |
|                                  |        | CRISPR17 spacer 4 (6 mismatches, 3 in seed position 3,6,8) | cct                  |                            |                                |

|           |        |                                                                                                                                                                                                                                                                                                                                                                                                                                                                                                                                                                                       |                                                                    |                                                                                |                                   |
|-----------|--------|---------------------------------------------------------------------------------------------------------------------------------------------------------------------------------------------------------------------------------------------------------------------------------------------------------------------------------------------------------------------------------------------------------------------------------------------------------------------------------------------------------------------------------------------------------------------------------------|--------------------------------------------------------------------|--------------------------------------------------------------------------------|-----------------------------------|
|           | R20291 | CRISPR10 spacer 3 (2 mismatches, <b>1 in seed position 3</b> )<br>CRISPR10 spacer 14<br>CRISPR15 spacer 7 ( <b>5 mismatches, 1 in seed position 5</b> )<br>CRISPR16 spacer 5 (2 mismatches, no in seed)<br>CRISPR19 spacer 12 ( <b>8 mismatches, 2 in seed position 3,5</b> )                                                                                                                                                                                                                                                                                                         | cca<br>cct<br>cca<br>cca<br>cca                                    | Expected resistant                                                             | Resistant                         |
| phiC2     | 630    | CRISPR4 spacer 3 (1 mismatch, no in seed)<br>CRISPR8 spacer 2 (2 mismatches, no in seed)<br>CRISPR15 spacer 3 (1 mismatch, no in seed)                                                                                                                                                                                                                                                                                                                                                                                                                                                | cca<br>ACA<br>cca                                                  | Expected resistant                                                             | ND                                |
|           | R20291 | CRISPR10 spacer 14 (1 mismatch, no in seed)<br>CRISPR19 spacer 12 (3 mismatches, no in seed)<br>CRISPR20 spacer 3 ( <b>7 mismatches, 1 in seed position 6</b> )                                                                                                                                                                                                                                                                                                                                                                                                                       | cct<br>cca<br>cca                                                  | Expected resistant                                                             |                                   |
| phiCD38-2 | 630    | CRISPR6 spacer 8<br>CRISPR8 spacer 4<br>CRISPR9 spacer 3 (4 mismatches, <b>2 in seed positions 5 and 6</b> )<br>CRISPR9 spacer 4<br>CRISPR9 spacer 11 (2 mismatches, no in seed)<br>CRISPR10 spacer 2 ( <b>8 mismatches, 1 in seed position 8</b> )<br>CRISPR11 spacer 10 (4 mismatches, <b>1 in seed position 3</b> )<br>CRISPR12 spacer 6 ( <b>8 mismatches, 3 in seed position 1,2,8</b> )                                                                                                                                                                                         | cca<br>cca<br>cct<br>TCC<br>cca<br>CAA<br>cca<br>cct               | Expected resistant                                                             | Resistant                         |
|           | R20291 | CRISPR10 spacer 4 ( <b>6 mismatches, no in seed</b> )<br>CRISPR10 spacer 5 (2 mismatches, no in seed)<br>CRISPR10 spacer 7 ( <b>9 mismatches, 4 in seed position 1,3,4,8</b> )<br>CRISPR10 spacer 9 ( <b>8 mismatches, 4 in seed position 2,6,7,8</b> )<br>CRISPR11 spacer 3 (4 mismatches, <b>2 in seed positions 3 and 7</b> )<br>CRISPR11 spacer 5 (2 mismatches, <b>1 in seed position 8</b> )<br>CRISPR11 spacer 7<br>CRISPR15 spacer 2 ( <b>5 mismatches, 2 in seed position 4,7</b> )<br>CRISPR16 spacer 6<br>CRISPR19 spacer 23 ( <b>6 mismatches, 1 in seed position 3</b> ) | cca<br>cca<br>AGT<br>cct<br>cca<br>cct<br>cca<br>AAA<br>cca<br>cca | Possible sensitive (only leader-distal spacers less expressed, less efficient) | Sensitive (Sekulovic et al, 2014) |
| phiCD119  | 630    | CRISPR4 spacer 1 ( <b>6 mismatches, 3 in seed position 2,5,6</b> )<br>CRISPR6 spacer 13 (3 mismatches, <b>2 in seed positions 2 and 3</b> )<br>CRISPR7 spacer 11 ( <b>8 mismatches, 2 in seed position 3,5</b> )<br>CRISPR8 spacer 2<br>CRISPR9 spacer 8 ( <b>8 mismatches, 3 in seed, position 1,3,6</b> )<br>CRISPR11 spacer 4 ( <b>6 mismatches, 4 in seed positions 3, 5, 7, 8</b> )<br>CRISPR15 spacer 1 ( <b>6 mismatches, 3 in seed position 2, 5, 6</b> )                                                                                                                     | cca<br>cca<br>cct<br>ACA<br>AGA<br>cca<br>cca                      | Expected sensitive                                                             | ND                                |
|           | R20291 | CRISPR10 spacer 13 ( <b>7 mismatches, 3 in seed position 4,6,7</b> )<br>CRISPR13 spacer 4 ( <b>5 mismatches, 2 in seed position 2,6</b> )<br>CRISPR19 spacer 12 (3 mismatches, no in seed)<br>CRISPR20 spacer 3 ( <b>7 mismatches, 1 in seed position 6</b> )                                                                                                                                                                                                                                                                                                                         | cca<br>cct<br>cca<br>cca                                           | Expected resistant                                                             |                                   |
| phiCD6356 | 630    | CRISPR9 spacer 2<br>CRISPR17 spacer 2<br>CRISPR17 spacer 3 ( <b>7 mismatches, 3 in seed position 4,7,8</b> )<br>CRISPR17 spacer 4 (5 mismatches, <b>3 in seed position 3,6,8</b> )                                                                                                                                                                                                                                                                                                                                                                                                    | cca<br>cct<br>cca<br>cct                                           | Expected resistant                                                             | ND                                |
|           | R20291 | CRISPR10 spacer 4 ( <b>9 mismatches, 4 in seed position 1,4,7,8</b> )<br>CRISPR10 spacer 8<br>CRISPR10 spacer 10 ( <b>3 mismatches in seed positions 3, 4, 7</b> )<br>CRISPR12 spacer 1 ( <b>8 mismatches, 4 in seed position 1,3,4,5</b> )<br>CRISPR15 spacer 3<br>CRISPR15 spacer 9 (1 mismatch, no in seed)<br>CRISPR19 spacer 6 ( <b>2 mismatches in seed position 6,8</b> )<br>CRISPR19 spacer 7 (4 mismatches, <b>1 in seed position 8</b> )<br>CRISPR19 spacer 9 (6 mismatches, no in seed)<br>CRISPR20 spacer 5 (2 mismatches, no in seed)                                    | TAA<br>cca<br>cca<br>CCG<br>cct<br>cca<br>cct<br>cca<br>cca<br>cct | Expected resistant                                                             |                                   |
| phiIMMP01 | 630    | CRISPR4 spacer 3 (1 mismatch, no in seed)<br>CRISPR15 spacer 3 (1 mismatch, no in seed)<br>CRISPR17 spacer 15                                                                                                                                                                                                                                                                                                                                                                                                                                                                         | cca<br>cca<br>cct                                                  | Expected resistant                                                             | Resistant                         |
|           | R20291 | CRISPR19 spacer 12 (3 mismatches, no in seed)                                                                                                                                                                                                                                                                                                                                                                                                                                                                                                                                         | cca                                                                | Expected resistant                                                             | Resistant (Sekulovic et al, 2014) |
| phiIMMP03 | 630    | CRISPR4 spacer 3 (1 mismatch, no in seed)<br>CRISPR8 spacer 2<br>CRISPR15 spacer 3 (1 mismatch, no in seed)<br>CRISPR17 spacer 4 ( <b>6 mismatches, 4 in seed position 1,3,6,8</b> )                                                                                                                                                                                                                                                                                                                                                                                                  | cca<br>ACA<br>cca<br>cct                                           | Expected resistant                                                             | Resistant                         |
|           | R20291 | CRISPR10 spacer 14 (1 mismatch, no in seed)<br>CRISPR19 spacer 12 (3 mismatches, no in seed)                                                                                                                                                                                                                                                                                                                                                                                                                                                                                          | cct<br>cca                                                         | Expected resistant                                                             | Resistant (Sekulovic, AEM, 2014)  |
| phiCD24-1 | 630    |                                                                                                                                                                                                                                                                                                                                                                                                                                                                                                                                                                                       |                                                                    | Expected sensitive                                                             | Resistant by other mechanisms     |
|           | R20291 |                                                                                                                                                                                                                                                                                                                                                                                                                                                                                                                                                                                       |                                                                    | Expected sensitive                                                             | Resistant by other mechanisms     |

|                                                                      |        |                                                                           |            |                                                                                |                                                       |
|----------------------------------------------------------------------|--------|---------------------------------------------------------------------------|------------|--------------------------------------------------------------------------------|-------------------------------------------------------|
| phiCD52                                                              | 630    |                                                                           |            | Expected sensitive                                                             | Resistant by other mechanisms                         |
|                                                                      | R20291 | CRISPR10 spacer 14<br>CRISPR19 spacer 12 (3 mismatches, no in seed)       | cct<br>cca | Expected resistant                                                             | Resistant (Sekulovic et al, 2014)                     |
| phiCD111                                                             | 630    | CRISPR3 spacer 5 (4 mismatches, <b>1 in seed insertion position 3</b> )   | CTT        | Expected resistant                                                             | Resistant                                             |
|                                                                      |        | CRISPR6 spacer 1 (6 mismatches, <b>3 in seed positions 4,7,8</b> )        | CTA        |                                                                                |                                                       |
|                                                                      |        | CRISPR6 spacer 8 (3 mismatches, no in seed)                               | cca        |                                                                                |                                                       |
|                                                                      |        | CRISPR8 spacer 4 (3 mismatches, no in seed)                               | cca        |                                                                                |                                                       |
|                                                                      |        | CRISPR9 spacer 3 (4 mismatches, <b>2 in seed positions 5 and 6</b> )      | cct        |                                                                                |                                                       |
|                                                                      |        | CRISPR9 spacer 4 (1 mismatch, seed position 6)                            | TCC        |                                                                                |                                                       |
|                                                                      | R20291 | CRISPR9 spacer 11 (3 mismatches, no in seed)                              | cca        | Expected sensitive                                                             | Resistant by other mechanisms (Sekulovic et al, 2014) |
|                                                                      |        | CRISPR10 spacer 2 (2 mismatches, <b>1 in seed position 5</b> )            | CTA        |                                                                                |                                                       |
|                                                                      |        | CRISPR12 spacer 6 (10 mismatches, <b>3 in seed position 1,2,8</b> )       | cct        |                                                                                |                                                       |
|                                                                      |        | CRISPR16 spacer 5 (4 mismatches, <b>1 in seed position 3</b> )            | cct        |                                                                                |                                                       |
| phiCD146                                                             | 630    | CRISPR10 spacer 4 (4 mismatches, <b>2 in seed position 4,7</b> )          | cca        | Expected resistant                                                             | Resistant                                             |
|                                                                      |        | CRISPR10 spacer 7 (12 mismatches, <b>6 in seed position 1,3,4,5,6,7</b> ) | TCA        |                                                                                |                                                       |
|                                                                      |        | CRISPR10 spacer 9 (8 mismatches, <b>4 in seed position 2,6,7,8</b> )      | cct        |                                                                                |                                                       |
|                                                                      |        | CRISPR11 spacer 3 (3 mismatches, <b>2 in seed position 3,7</b> )          | cca        |                                                                                |                                                       |
|                                                                      |        | CRISPR11 spacer 7 (1 mismatch in seed position 6)                         | CCC        |                                                                                |                                                       |
|                                                                      |        | CRISPR15 spacer 2 (3 mismatches, <b>1 in seed position 7</b> )            | cct        |                                                                                |                                                       |
|                                                                      | R20291 | CRISPR16 spacer 6 (2 mismatches, <b>2 in seed position 4,5</b> )          | cca        | Possible sensitive (only leader-distal spacers less expressed, less efficient) | Sensitive (Sekulovic et al, 2014)                     |
|                                                                      |        | CRISPR19 spacer 23 (5 mismatches, <b>1 in seed position 3</b> )           | cca        |                                                                                |                                                       |
|                                                                      |        | CRISPR6 spacer 8                                                          | cca        |                                                                                |                                                       |
|                                                                      |        | CRISPR8 spacer 4 (1 mismatch, no in seed)                                 | cca        |                                                                                |                                                       |
|                                                                      |        | CRISPR9 spacer 3 (4 mismatches, <b>2 in seed positions 5 and 6</b> )      | cct        |                                                                                |                                                       |
|                                                                      |        | CRISPR9 spacer 4                                                          | TCC        |                                                                                |                                                       |
|                                                                      |        | CRISPR9 spacer 11 (2 mismatches, no in seed)                              | cca        |                                                                                |                                                       |
| phiCD211                                                             | 630    | CRISPR10 spacer 2 (2 mismatches, <b>1 in seed position 5</b> )            | CTA        | Expected resistant                                                             | Resistant                                             |
|                                                                      |        | CRISPR11 spacer 10 (3 mismatches, <b>1 in seed position 3</b> )           | cca        |                                                                                |                                                       |
|                                                                      |        | CRISPR12 spacer 6 (5 mismatches, <b>2 in seed position 1,2</b> )          | cct        |                                                                                |                                                       |
|                                                                      |        | CRISPR10 spacer 4 (6 mismatches, no in seed)                              | cca        |                                                                                |                                                       |
|                                                                      |        | CRISPR10 spacer 5 (1 mismatch, no in seed)                                | cca        |                                                                                |                                                       |
|                                                                      |        | CRISPR10 spacer 7 (6 mismatches, <b>4 in seed position 1,3,4,8</b> )      | AGT        |                                                                                |                                                       |
|                                                                      | R20291 | CRISPR11 spacer 3 (3 mismatches, <b>2 in seed position 3,7</b> )          | cca        | Expected sensitive                                                             |                                                       |
|                                                                      |        | CRISPR11 spacer 7 (3 mismatches, no in seed)                              | cca        |                                                                                |                                                       |
|                                                                      |        | CRISPR15 spacer 2 (4 mismatches, no in seed)                              | CTT        |                                                                                |                                                       |
|                                                                      |        | CRISPR16 spacer 6 (2 mismatches, <b>2 in seed position 4,5</b> )          | cca        |                                                                                |                                                       |
| phiCD481-1                                                           | 630    | CRISPR19 spacer 23 (6 mismatches, <b>2 in seed position 1,3</b> )         | cca        | Expected resistant                                                             | Resistant                                             |
|                                                                      |        | CRISPR3 spacer 2                                                          | cct        |                                                                                |                                                       |
|                                                                      |        | CRISPR16 spacer 2                                                         | cct        |                                                                                |                                                       |
| phiCD481-1                                                           | 630    | CRISPR17 spacer 11                                                        | cct        | Expected sensitive                                                             | Resistant by other mechanisms                         |
|                                                                      |        | CRISPR17 spacer 12                                                        | cca        |                                                                                |                                                       |
|                                                                      |        | CRISPR19 spacer 16 (1 mismatch in seed position 1)                        | CTT        |                                                                                |                                                       |
| phiCD505                                                             | 630    | CRISPR19 spacer 17                                                        | GCT        | Expected sensitive                                                             | Resistant by other mechanisms                         |
|                                                                      |        | CRISPR6 spacer 8 (1 mismatch in seed position 1)                          | CGA        |                                                                                |                                                       |
|                                                                      |        | CRISPR7 spacer 6 (3 mismatches, no in seed)                               | TCG        |                                                                                |                                                       |
|                                                                      | R20291 | CRISPR9 spacer 3 (6 mismatches, <b>3 in seed positions 5,7 and 8</b> )    | cct        | Expected sensitive                                                             | Sensitive (Sekulovic et al, 2014)                     |
|                                                                      |        | CRISPR9 spacer 4 (8 mismatches, <b>3 in seed position 1,3,7</b> )         | ACC        |                                                                                |                                                       |
| phiCD505                                                             | 630    | CRISPR10 spacer 1 (6 mismatches, <b>4 in seed position 3,4,5,6</b> )      | cct        | Expected resistant                                                             | Resistant                                             |
|                                                                      |        | CRISPR11 spacer 3 (3 mismatches, <b>2 in seed position 3,7</b> )          | cca        |                                                                                |                                                       |
|                                                                      |        | CRISPR15 spacer 10                                                        | CCG        |                                                                                |                                                       |
|                                                                      |        | CRISPR16 spacer 4 (6 mismatches, <b>2 in seed position 2,8</b> )          | CAA        |                                                                                |                                                       |
|                                                                      |        | CRISPR20 spacer 7 (6 mismatches, <b>3 in seed position 1,3,6</b> )        | cca        |                                                                                |                                                       |
|                                                                      |        | CRISPR4 spacer 2 (3 mismatches, <b>1 in seed position 5</b> )             | cct        |                                                                                |                                                       |
|                                                                      | R20291 | CRISPR8 spacer 2 (2 mismatches, no in seed)                               | cca        | Expected resistant                                                             | Resistant (Sekulovic et al, 2014)                     |
|                                                                      |        | CRISPR8 spacer 8 (1 mismatch, no in seed)                                 | cca        |                                                                                |                                                       |
|                                                                      |        | CRISPR9 spacer 1                                                          | cca        |                                                                                |                                                       |
|                                                                      |        | CRISPR11 spacer 1                                                         | cct        |                                                                                |                                                       |
| phiCD506                                                             | 630    | CRISPR15 spacer 2 (5 mismatches, <b>1 in seed position 5</b> )            | cct        | Expected resistant                                                             | Resistant                                             |
|                                                                      |        | CRISPR17 spacer 1                                                         | cct        |                                                                                |                                                       |
|                                                                      |        | CRISPR17 spacer 4 (6 mismatches, <b>3 in seed position 3,6,8</b> )        | cct        |                                                                                |                                                       |
| phiCD506                                                             | 630    | CRISPR10 spacer 14                                                        | cct        | Expected resistant                                                             | Resistant                                             |
|                                                                      |        | CRISPR16 spacer 5 (1 mismatch, no in seed)                                | cca        |                                                                                |                                                       |
|                                                                      |        | CRISPR19 spacer 12 (3 mismatches, no in seed)                             | cca        |                                                                                |                                                       |
|                                                                      |        | CRISPR6 spacer 8 (1 mismatch, no in seed)                                 | cca        |                                                                                |                                                       |
|                                                                      |        | CRISPR7 spacer 6 (3 mismatches, no in seed)                               | CCG        |                                                                                |                                                       |
|                                                                      |        | CRISPR9 spacer 3 (4 mismatches, <b>2 in seed positions 5 and 6</b> )      | cct        |                                                                                |                                                       |
|                                                                      |        | CRISPR9 spacer 4 (8 mismatches, <b>3 in seed position 1,3,7</b> )         | ACC        |                                                                                |                                                       |
| CRISPR17 spacer 4 (7 mismatches, <b>4 in seed position 1,3,6,8</b> ) | TCT    |                                                                           |            |                                                                                |                                                       |

|           |        |                                                                                                                                                                                                                                                                               |                                               |                    |                                   |
|-----------|--------|-------------------------------------------------------------------------------------------------------------------------------------------------------------------------------------------------------------------------------------------------------------------------------|-----------------------------------------------|--------------------|-----------------------------------|
|           | R20291 | CRISPR10 spacer 1 (6 mismatches, 4 in seed position 3,4,5,6)<br>CRISPR11 spacer 3 (2 mismatches, 1 in seed position 7)<br>CRISPR15 spacer 10<br>CRISPR16 spacer 4 (6 mismatches, 2 in seed position 2,8)<br>CRISPR20 spacer 7 (6 mismatches, 2 in seed position 1,3, 6)       | cct<br>cca<br>CCG<br>CAA<br>cca               | Expected sensitive | Resistant (Sekulovic et al, 2014) |
| phiIMMP02 | 630    | CRISPR4 spacer 2 (2 mismatches, no in seed)<br>CRISPR8 spacer 2<br>CRISPR9 spacer 1<br>CRISPR11 spacer 1<br>CRISPR15 spacer 2 (2 mismatches, no in seed)<br>CRISPR17 spacer 1<br>CRISPR17 spacer 4 (9 mismatches, 5 in seed position 1,2,3,6,8)                               | cct<br>ACA<br>cca<br>cct<br>cct<br>cct<br>cct | Expected resistant | Resistant                         |
|           | R20291 | CRISPR16 spacer 5 (1 mismatch, no in seed)<br>CRISPR19 spacer 10<br>CRISPR19 spacer 12 (4 mismatches, no in seed)<br>CRISPR20 spacer 3 (7 mismatches, 1 in seed position 6)                                                                                                   | cca<br>cca<br>TCA<br>cca                      | Expected resistant | Resistant (Sekulovic et al, 2014) |
| phiIMMP04 | 630    | CRISPR7 spacer 6 (4 mismatches, 1 in seed position 3)<br>CRISPR9 spacer 3 (6 mismatches, 2 in seed positions 5 and 6)<br>CRISPR9 spacer 4 (6 mismatches, 2 in seed position 1,3)                                                                                              | CCG<br>cct<br>ACC                             | Expected sensitive | Resistant by other mechanisms     |
|           | R20291 | CRISPR10 spacer 1 (8 mismatches, 4 in seed position 3,4,5,6)<br>CRISPR11 spacer 3 (4 mismatches, 2 in seed position 2,3)<br>CRISPR15 spacer 10<br>CRISPR16 spacer 4 (4 mismatches, position 8 in seed, 26,29,34)<br>CRISPR20 spacer 7 (4 mismatches, 2 in seed position 1, 6) | cct<br>cca<br>CCG<br>CAA<br>cca               | Expected sensitive | Resistant (Sekulovic et al, 2014) |
| phiCDMH1  | 630    | CRISPR4 spacer 3 (1 mismatch, no in seed)<br>CRISPR8 spacer 2<br>CRISPR15 spacer 3 (1 mismatch, no in seed)                                                                                                                                                                   | cca<br>CTA<br>cca                             | Expected resistant | ND                                |
|           | R20291 | CRISPR19 spacer 12 (3 mismatches, no in seed)                                                                                                                                                                                                                                 | cca                                           | Expected resistant |                                   |
| pCDBI1    | 630    | CRISPR9 spacer 6                                                                                                                                                                                                                                                              | cca                                           | Expected resistant | ND                                |
|           | R20291 | CRISPR11 spacer 10 (7 mismatches, position 3,6 in seed, 9,15,30,32,37)<br>CRISPR19 spacer 1<br>CRISPR19 spacer 2                                                                                                                                                              | CTT<br>cca<br>cct                             | Expected resistant |                                   |
| pCD630    | 630    |                                                                                                                                                                                                                                                                               |                                               |                    | ND                                |
|           | R20291 | CRISPR15 spacer 10 (2 mismatches, no in seed)                                                                                                                                                                                                                                 | CCG                                           | Expected sensitive |                                   |
