# Supplementary material for: Function of the CRISPR-Cas System of the Human Pathogen Clostridium difficile
Source: PubMed Central journal article supplement — mBio. 2015 Sep 1;6(5):e01112-15. doi: 10.1128/mBio.01112-15 (PMC4556805; doi:10.1128/mbio.01112-15), 2015-09-01
Supplement: mbo004152441st5.pdf [file mbo004152441st5.pdf]

**Table S5. *C. difficile* Cas locus analysis.** A) Occurrence of *cas* loci homologous to *CD2982-CD2975* and *CD2455-CD2451* from 630 strain in published genomes of *C. difficile* strains. Correlation between MLST of strains and the absence of *CD2982-2975 cas* locus (B) or the presence of the *CDR2998-2994* locus (C).

**A**

| Accession    | PMID     | Nb. strains analysed | <i>CD2982-75</i> | <i>CD2455-51</i> | <i>CDR2998-94</i> |
|--------------|----------|----------------------|------------------|------------------|-------------------|
| PRJEB4556    | 24066741 | 785                  | 633              | 785              | 289               |
| PRJEB3093    | 24336451 | 494                  | 465              | 494              | 117               |
| PRJEB2318    | 23222960 | 274                  | 273              | 274              | 269               |
| PRJEB1483    | 24336451 | 210                  | 200              | 210              | 4                 |
| PRJEB2207    | 23222960 | 151                  | 151              | 151              | 147               |
| PRJEB1729    | 24336451 | 143                  | 125              | 143              | 49                |
| PRJEB2039    | 23222960 | 55                   | 53               | 52               | 51                |
| PRJEB3010    | 24336451 | 43                   | 37               | 43               | 2                 |
| PRJEB190-216 | 24482682 | 27                   | 23               | 27               | 1                 |
| PRJEB2134    | 23222960 | 22                   | 22               | 22               | 21                |
| PRJEB6600-2  | 24913157 | 3                    | 0                | 3                | 0                 |
|              |          | <b>2207</b>          | <b>89.8%</b>     | <b>99.9%</b>     | <b>43.0%</b>      |

**B**

| MLST <sup>a</sup> | Strains lacking <i>CD2982-75</i> | %    |
|-------------------|----------------------------------|------|
| 3 (027)           | 3 / 856                          | 0%   |
| 5                 | 3 / 3                            | 100% |
| 9                 | 19 / 19                          | 100% |
| 12                | 9 / 10                           | 90%  |
| 13                | 7 / 7                            | 100% |
| 18                | 2 / 2                            | 100% |
| 19                | 124 / 237                        | 52%  |
| 22                | 2 / 2                            | 100% |
| 23                | 1 / 23                           | 4%   |
| 25                | 5 / 10                           | 50%  |
| 27                | 1 / 3                            | 33%  |
| 45                | 37 / 37                          | 100% |
| 46                | 6 / 6                            | 100% |
| 51                | 2 / 2                            | 100% |
| 58                | 4 / 4                            | 100% |

<sup>a</sup> MLST: Multilocus sequence typing

**C**

| MLST <sup>a</sup> | Strains with <i>CDR2998-94</i> | %    |
|-------------------|--------------------------------|------|
| 3 (027)           | 849 / 856                      | 99%  |
| 4                 | 2 / 4                          | 50%  |
| 6                 | 2 / 12                         | 17%  |
| 9                 | 19 / 19                        | 100% |
| 15                | 8 / 8                          | 100% |
| 17                | 20 / 23                        | 87%  |
| 19                | 1 / 237                        | 0%   |
| 21                | 12 / 12                        | 100% |
| 23                | 16 / 23                        | 70%  |
| 24                | 19 / 20                        | 95%  |
| 25                | 9 / 10                         | 90%  |
| 33                | 1 / 151                        | 1%   |
| 38                | 7 / 7                          | 100% |
| 39                | 3 / 180                        | 2%   |
| 49                | 1 / 61                         | 2%   |

<sup>a</sup> MLST: Multilocus sequence typing
