# Supplementary material for: Function of the CRISPR-Cas System of the Human Pathogen Clostridium difficile
Source: PubMed Central journal article supplement — mBio. 2015 Sep 1;6(5):e01112-15. doi: 10.1128/mBio.01112-15 (PMC4556805; doi:10.1128/mbio.01112-15), 2015-09-01
Supplement: mbo004152441st6.pdf [file mbo004152441st6.pdf]

**Table S6. Oligonucleotides used in this study.**

| Name                                                               | Sequence (5'-3')                                                                           | Description                     |
|--------------------------------------------------------------------|--------------------------------------------------------------------------------------------|---------------------------------|
| <b>Cas cloning</b>                                                 |                                                                                            |                                 |
| OS674                                                              | GGGGATGCCATGGCTAAAATGAAAATTGAATTTAGTACAGGT                                                 | 5'-CD2982-<br>NcoI              |
| OS677                                                              | AAGGAAAAAAGCGGCCGCTTACTCCTCCTTCACAAAACA                                                    | 3'-CD2977-NotI                  |
| OS678                                                              | GGGGATGCCATGGCTTATAAAGACTATTATATTATAAGTAATGG                                               | 5'-CD2976-<br>NcoI              |
| OS675                                                              | AAGGAAAAAAGCGGCCGACCTATATAAACATTTTCATCAGAATAC                                              | 3'-CD2975-NotI                  |
| <b>Protospacer cloning into pT7Blue</b>                            |                                                                                            |                                 |
| Sp1-CR12-F                                                         | atCCAAAAGGTGTCCATTGATTTCTTTTCAGTTTCGGGAATAgc                                               | Spacer1-<br>CRISPR12            |
| Sp1-CR12-R                                                         | gcTATTCCCGAAACTGAAAGAAATCAATGGACACCTTTTGGat                                                | Spacer1-<br>CRISPR12<br>Mutated |
| Sp1mut-<br>CR12-F                                                  | atCCAgAAGGTGTCCATTGATTTCTTTTCAGTTTCGGGAATAgc                                               | Spacer1-<br>CRISPR12<br>Mutated |
| Sp1mut-<br>CR12-R                                                  | gcTATTCCCGAAACTGAAAGAAATCAATGGACACCTTcTGGat                                                | Spacer1-<br>CRISPR12            |
| Sp1-CR16-F                                                         | atCCAGTAGAGTCTTTATATGGTAGAGGTGGAATATATAAGTgc                                               | Spacer1-<br>CRISPR16            |
| Sp1-CR16-R                                                         | gcACTTATATATTCACCTCTACCATATAAAGACTCTACTGGat                                                | Spacer1-<br>CRISPR16<br>Mutated |
| Sp1mut-<br>CR16-F                                                  | atCCAaTAGAGTCTTTATATGGTAGAGGTGGAATATATAAGTgc                                               | Spacer1-<br>CRISPR16<br>Mutated |
| Sp1mut-<br>CR16-R                                                  | gcACTTATATATTCACCTCTACCATATAAAGACTCTAtTGGat                                                | Spacer1-<br>CRISPR16            |
| <b>CRISPR “mini-arrays” for <i>E. coli</i> strain construction</b> |                                                                                            |                                 |
| CRISPR12-5'                                                        | ACAATTCCTCTAGAAATAATTTTGTTTAACTTTTGCTTTTATTATATCACAAATTG                                   | CRISPR-12-<br>mini-array        |
| CRISPR12-3'                                                        | ATTTGCTTTTATTATATCACAAATTGACCCGTTTAGAGGCCCAAGGGGTTATGCTAGGGGATTTACATTTCCATATAGTTAATATAAAAC | CRISPR-12-<br>mini-array        |
| CRISPR16-5'                                                        | ACAATTCCTCTAGAAATAATTTTGTTTAACTTTTGCTTTTATTATACCACAAATTGGTACAG                             | CRISPR-16-<br>mini-array        |
| CRISPR16-3'                                                        | ATTTGCTTTTATTATACCACAAATTGGTACAGACTTATATATTCACCTCTACCATATAAAGAC                            | CRISPR-16-<br>mini-array        |
| Repeat-5'                                                          | ACAATTCCTCTAGAAATAATTTTGTTTAACTTTTGCTTTTATTATATCACAAATTG                                   | CRISPR repeat                   |
| Repeat-3'                                                          | ATTTGCTTTTATTATACCACAAATTGGTACAGCCCAAATAAATTGAGTATTTTC                                     | CRISPR repeat                   |
| <b>PAM CRISPR cloning into pMTL84121</b>                           |                                                                                            |                                 |
| OS486                                                              | GATCCCCAAAAGGTGTCCATTGATTTCTTTTCAGTTTCGGGAATA                                              | 5'CCA-spacer1-<br>CRISPR12      |
| OS487                                                              | AGCTTATTCGAAACTGAAAGAAATCAATGGACACCTTTTGGG                                                 | 3'CCA-spacer1-<br>CRISPR12      |
| OS488                                                              | GATCCCCTAAAGGTGTCCATTGATTTCTTTTCAGTTTCGGGAATA                                              | 5'CCT-spacer1-<br>CRISPR12      |
| OS489                                                              | AGCTTATTCGAAACTGAAAGAAATCAATGGACACCTTTAGGG                                                 | 3'CCT-spacer1-<br>CRISPR12      |
| OS490                                                              | GATCCGAGAAAGGTGTCCATTGATTTCTTTTCAGTTTCGGGAATA                                              | 5'GAG-spacer1-<br>CRISPR12      |
| OS491                                                              | AGCTTATTCGAAACTGAAAGAAATCAATGGACACCTTTCTCG                                                 | 3'GAG-spacer1-<br>CRISPR12      |
| OS525                                                              | GATCCAATAAAGGTGTCCATTGATTTCTTTTCAGTTTCGGGAATA                                              | 5'AAT-spacer1-<br>CRISPR12      |

OS526 AGCTTATCCCGAAACTGAAAGAAATCAATGGACACCTTTATTG

3'AAT-spacer1-  
CRISPR12

**Protospacer cloning into pRPF185**

OS681 cctCCAGTAGAGTCTTTATATGGTAGAGGTGGAATATATAAGTg

5'CCA-spacer1-  
CRISPR16

OS682 gatccACTTATATATCCACCTCTACCATATAAAGACTCTACTGGagg

3'CCA-spacer1-  
CRISPR16

OS683 cctCCAaTAGAGTCTTTATATGGTAGAGGTGGAATATATAAGTg

5'CCA Mutated  
Spacer1-

OS684 gatccACTTATATATCCACCTCTACCATATAAAGACTCTatTGGagg

CRISPR16

3'CCA Mutated  
Spacer1-  
CRISPR16

---
