# Supplementary figures and images for: Function of the CRISPR-Cas System of the Human Pathogen Clostridium difficile
Source: PubMed Central journal article supplement — mBio. 2015 Sep 1;6(5):e01112-15. doi: 10.1128/mBio.01112-15 (PMC4556805; doi:10.1128/mbio.01112-15), 2015-09-01

Fig. S2. Expression analysis of CRISPR arrays from *C. difficile* R20291 strain by RNA-seq

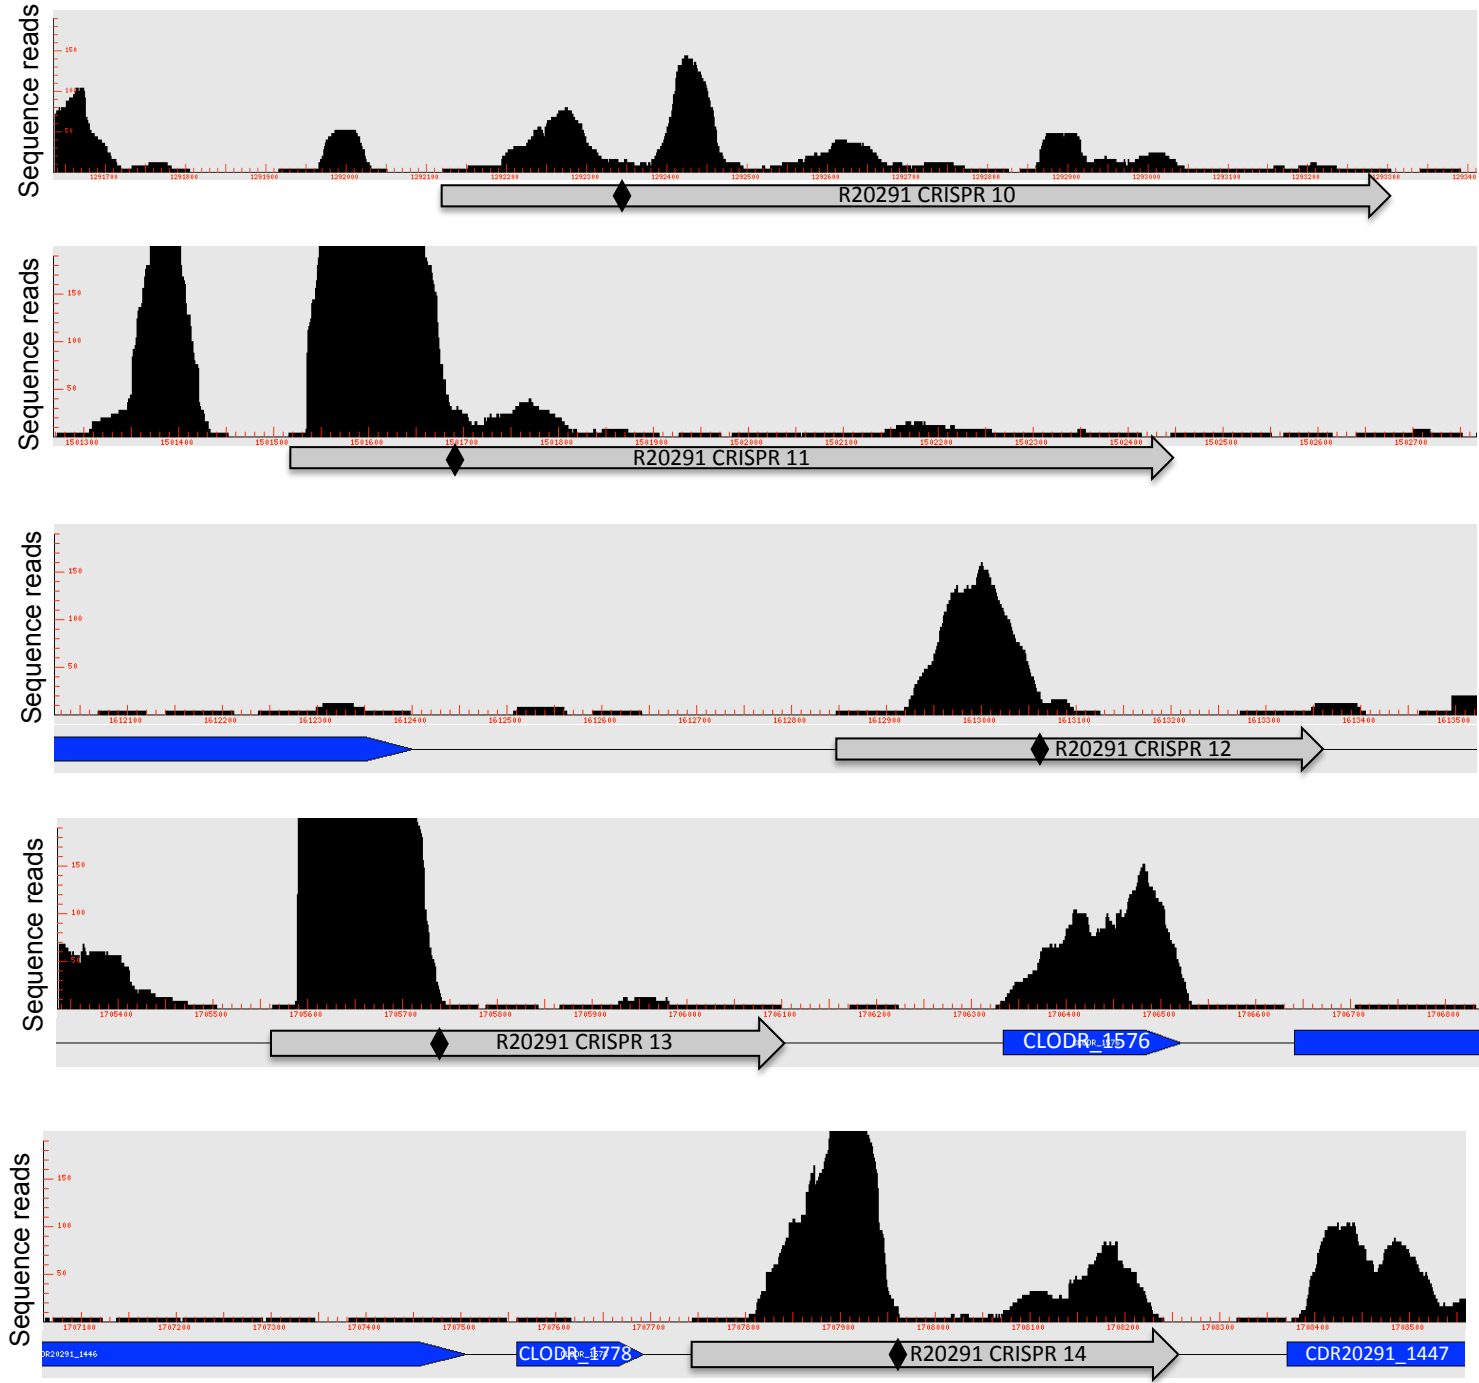

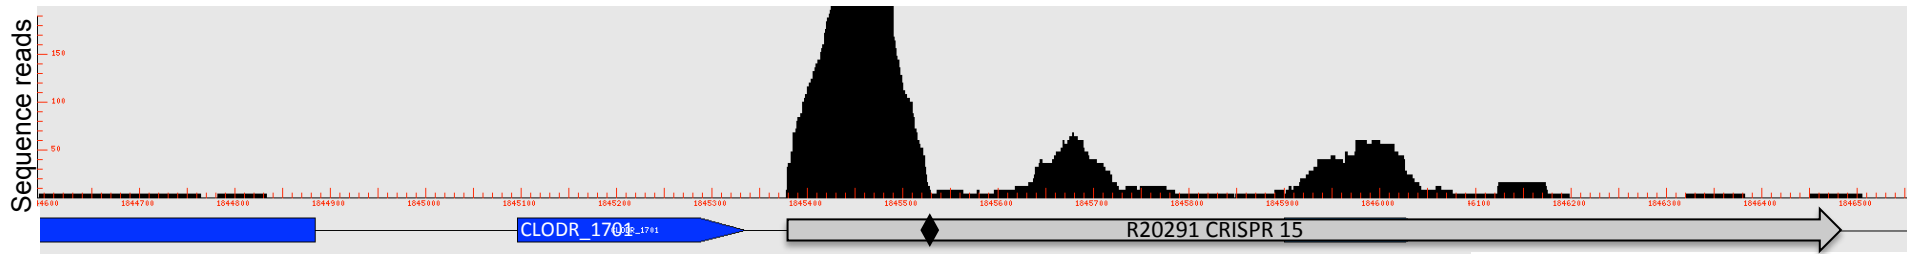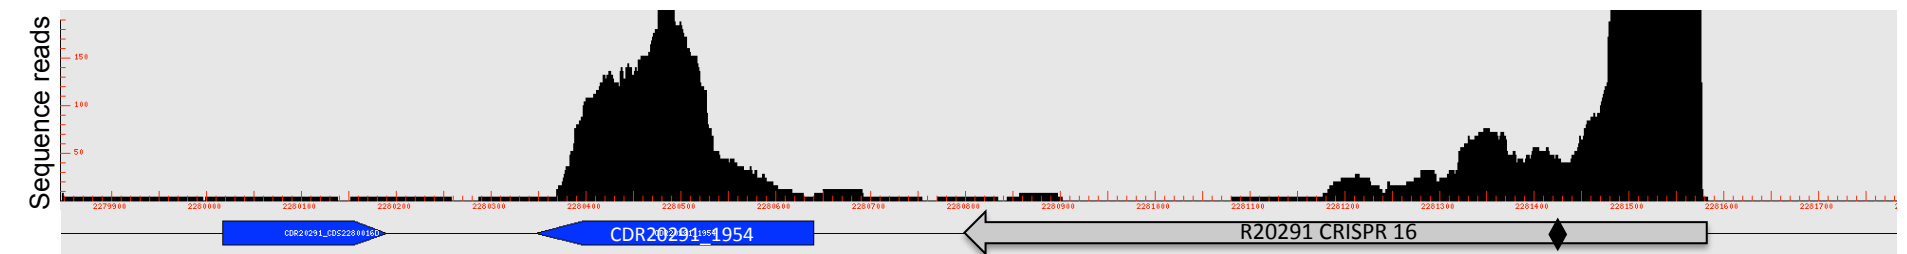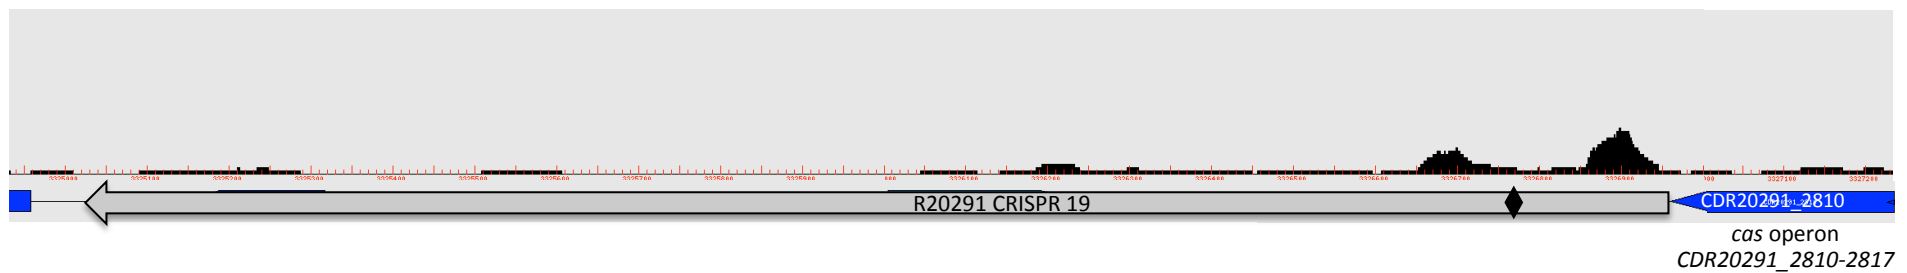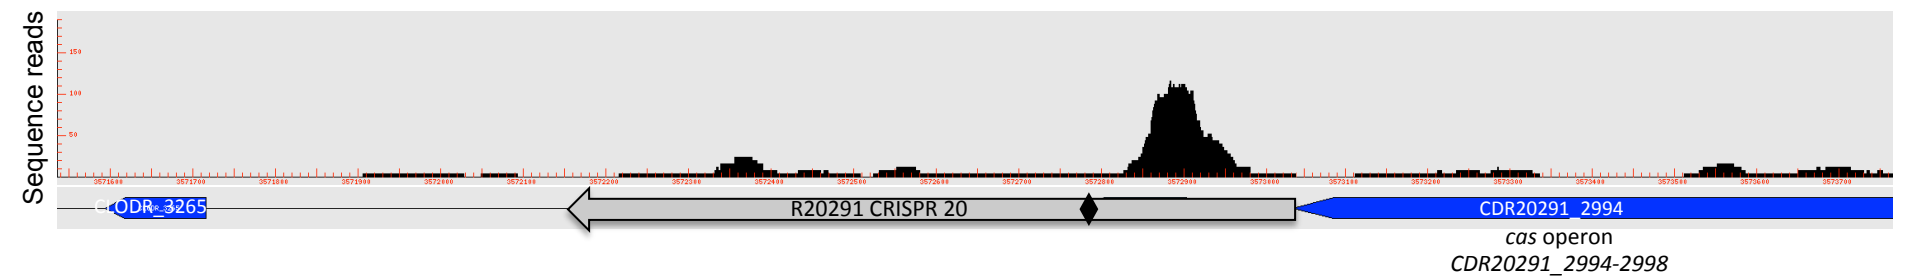

Supplement: mbo004152441sf2.pdf [file mbo004152441sf2.pdf]
